# Supplementary material for: Tandem processes promoted by a hydrogen shift in 6-arylfulvenes bearing acetalic units at ortho position: a combined experimental and computational study
Source: publisher site journal article supplement (doi:10.3762/bjoc.12.28), 2016-02-11

**Supporting Information**  
**for**  
**Tandem processes promoted by a hydrogen shift in 6-arylfulvenes bearing acetalic units at *ortho* position: a combined experimental and computational study**

Mateo Alajarin<sup>1</sup>, Marta Marin-Luna<sup>1</sup>, Pilar Sanchez-Andrada\*<sup>2</sup> and Angel Vidal<sup>1</sup>

Address: <sup>1</sup>Departamento de Química Orgánica, Universidad de Murcia, Facultad de Química, Regional Campus of International Excellence “Campus Mare Nostrum”, Espinardo, 30100 Murcia (Spain) and <sup>2</sup>University Centre of Defence at the Spanish Air Force Academy, Base Aerea de San Javier, C/ Coronel López Peña s/n, 30720, Santiago de la Ribera, Murcia, Spain

Email: Pilar Sanchez-Andrada - pilar.sanchez@cud.upct.es

\*Corresponding author

## **Experimental part**

### **General Methods**

All melting points are uncorrected. Infrared (IR) spectra were recorded as Nujol emulsions or neats. <sup>1</sup>H NMR spectra were recorded in CDCl<sub>3</sub>, CD<sub>2</sub>Cl<sub>2</sub> or DMSO-*d*<sub>6</sub> at 300 or 400 MHz. <sup>13</sup>C NMR spectra were recorded in CDCl<sub>3</sub>, CD<sub>2</sub>Cl<sub>2</sub> or DMSO-*d*<sub>6</sub> at 75 or 100 MHz. The chemical shifts are expressed in ppm, relative to Me<sub>4</sub>Si at  $\delta = 0.00$  ppm for <sup>1</sup>H, while the chemical shifts for <sup>13</sup>C are reported relative to the resonance of CDCl<sub>3</sub>  $\delta = 77.1$  ppm, CD<sub>2</sub>Cl<sub>2</sub>  $\delta = 54.0$  ppm or DMSO-*d*<sub>6</sub>  $\delta = 39.5$  ppm. Mass spectra were recorded on a HPLC/MS TOF 6220 Agilent Technologies apparatus.

### **Materials**

2-(1,3-Dioxolan-2-yl)benzaldehyde (**4a**) [1], 2-(1,3-dioxolan-2-yl)-4-methoxybenzaldehyde (**4b**) [2], 6-(1,3-dioxolan-2-yl)-1,3-benzodioxole-5-carboxaldehyde (**4c**) [3], 2-(1,3-dioxan-2-yl)benzaldehyde (**4d**) [4], 6-(1,3-dioxan-2-yl)-1,3-benzodioxole-

5-carboxaldehyde (**4f**) [4], 2-(dimethoxymethyl)benzaldehyde (**23a**) [5], 2-(dimethoxymethyl)-4-methoxybenzaldehyde (**23b**) [6], 6-(dimethoxymethyl)-1,3-benzodioxole-5-carboxaldehyde (**23c**) [7], 2-(diethoxymethyl)benzaldehyde (**23d**) [8] and 2-(1,3-dioxolan-2-yl)-2*d*benzaldehyde [9] were prepared following published experimental procedures.

#### Preparation of 2-(1,3-dioxan-2-yl)-4-methoxybenzaldehyde (**4e**)

*n*-BuLi [5.8 mL, 2.6 M in hexane, 14.4 mmol] was added dropwise to a solution of 2-(2-bromo-5-methoxyphenyl)-1,3-dioxane (3.4 g, 12.0 mmol) in anhydrous tetrahydrofuran (50 mL), at  $-78^{\circ}\text{C}$  under an atmosphere of nitrogen. The solution was stirred at  $-78^{\circ}\text{C}$  for 30 min. Then, a solution of *N,N*-dimethylformamide (1.12 mL, 14.4 mmol) in tetrahydrofuran (10 mL) was added dropwise. The reaction mixture was stirred at  $-78^{\circ}\text{C}$  for 15 min, warmed to room temperature and the stirring was continued for 3 h. After quenching the reaction by the addition of water (25 mL), the mixture was extracted with ethyl acetate ( $2 \times 30$  mL). The combined organic layers were washed with water ( $2 \times 100$  mL) and dried over anhydrous  $\text{MgSO}_4$ . The solvent was removed under reduced pressure and the resulting oil was purified by silica gel column chromatography, using hexanes/diethyl ether (3:2, v/v) as eluent.

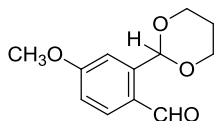

**2-(1,3-Dioxan-2-yl)-4-methoxybenzaldehyde **4e**:** (65%); mp  $105\text{--}107^{\circ}\text{C}$  (colourless prisms, diethyl ether);  $\nu_{\text{max}}$  (Neat)/ $\text{cm}^{-1}$  1684 (vs), 1601 (s), 1089 (s);  $\delta_{\text{H}}$  (400 MHz,  $\text{CDCl}_3$ ) 1.44–1.49 (1H, m), 2.19–2.28 (1H, m), 3.87 (3H, m), 4.00–4.07 (2H, m), 4.24–4.28 (2H, m), 6.08 (1H, m), 6.94 (1H, dd,  $J = 2.8, 8.4\text{Hz}$ ), 7.23 (1H, d,  $J = 2.8\text{ Hz}$ ), 7.85 (1H, d,  $J = 8.4\text{ Hz}$ ), 10.3 (1H, s);  $\delta_{\text{C}}$  (100 MHz,  $\text{CDCl}_3$ ) 25.7, 55.6, 67.2, 99.1, 112.1, 114.6, 126.8 (s), 133.0, 142.1 (s), 163.9 (s), 190.8 (s); HRMS (ESI)  $m/z$  calcd for  $\text{C}_{12}\text{H}_{15}\text{O}_4$  [ $\text{M}+\text{H}$ ] $^{+}$  223.0965; found: 223.0963.

#### Procedure for the preparation of fulvenes **3** and **24**

To a solution of the appropriate benzaldehyde **4** or **23** (3 mmol) in dry methanol (15 mL) were added cyclopentadiene (0.4 g, 6 mmol) and pyrrolidine (0.43 g, 6 mmol). The reaction mixture was stirred at room temperature overnight. Then, the reaction mixture was acidified with acetic acid (1 mL), diluted with water (40 mL) and extracted with diethyl ether ( $3 \times 20$  mL). The organic layer was washed with brine ( $2 \times 10$  mL), dried over

anhydrous MgSO<sub>4</sub>, filtered and evaporated under reduced pressure. The resulting residue was purified by silica gel column chromatography.

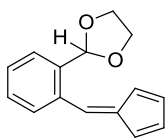

**Fulvene 3a:** eluent for column chromatography: hexanes/diethyl ether (9:1 v/v); (65%); red oil;  $\nu_{\text{max}}$  (Neat)/cm<sup>-1</sup> 1626 (vs), 1600 (s), 1572 (s);  $\delta_{\text{H}}$  (300 MHz, DMSO-d<sub>6</sub>, 100 °C) 3.95-4.09 (4H, m), 5.99 (1H, s), 6.37-6.43 (2H, m), 6.50-6.53 (1H, m), 6.61-6.64 (1H, m), 7.39-7.49 (3H, m), 7.58-7.61 (1H, m), 7.67 (1H, s);  $\delta_{\text{C}}$  (75 MHz, DMSO-d<sub>6</sub>, 100 °C) 64.2, 100.8, 119.9, 125.9, 126.0, 127.8, 128.0, 130.2, 130.7, 134.2, 134.6 (s), 135.0, 136.4 (s), 145.3 (s); HRMS (ESI)  $m/z$  calcd for C<sub>15</sub>H<sub>15</sub>O<sub>2</sub> [M+H]<sup>+</sup> 227.1067; found: 227.1067.

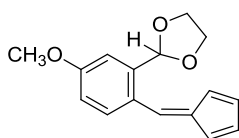

**Fulvene 3b:** eluent for column chromatography: hexanes/diethyl ether (9:1 v/v); (75%); red oil;  $\nu_{\text{max}}$  (Neat)/cm<sup>-1</sup> 1601 (vs), 1496 (s), 1287 (s);  $\delta_{\text{H}}$  (400 MHz, CDCl<sub>3</sub>) 3.87 (3H, s), 4.04-4.17 (4H, m), 6.02 (1H, s), 6.36-6.37 (1H, m), 6.53-6.55 (2H, m), 6.64-6.65 (1H, m), 6.95 (1H, dd,  $J$  = 2.8, 8.4 Hz), 7.21 (1H, d,  $J$  = 2.8 Hz), 7.53 (1H, d,  $J$  = 8.4 Hz), 7.60 (1H, s);  $\delta_{\text{C}}$  (100 MHz, CDCl<sub>3</sub>) 55.4, 65.4, 101.5, 111.6, 114.6, 120.9, 126.5, 128.1 (s), 130.8, 133.9, 134.7, 135.6, 138.4 (s), 145.2 (s), 160.3 (s); HRMS (ESI)  $m/z$  calcd for C<sub>16</sub>H<sub>17</sub>O<sub>3</sub> [M+H]<sup>+</sup> 257.1172; found: 257.1182.

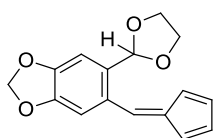

**Fulvene 3c:** eluent for column chromatography: hexanes/diethyl ether (9:1 v/v); (65%); red oil;  $\nu_{\text{max}}$  (Neat)/cm<sup>-1</sup> 1602 (m), 1502 (vs), 1484 (vs);  $\delta_{\text{H}}$  (400 MHz, CDCl<sub>3</sub>) 4.01-4.16 (4H, m), 5.97 (2H, s), 6.01 (1H, s), 6.32-6.35 (1H, m), 6.52-6.53 (2H, m), 6.63-6.65 (1H, m), 7.04 (1H, s), 7.14 (1H, s), 7.52 (1H, s);  $\delta_{\text{C}}$  (100 MHz, CDCl<sub>3</sub>) 65.4, 101.1, 101.6, 106.7, 111.8, 120.6, 126.6, 129.9 (s), 131.1, 131.6 (s), 135.1, 145.7 (s), 148.1 (s), 148.3 (s); HRMS (ESI)  $m/z$  calcd for C<sub>16</sub>H<sub>15</sub>O<sub>4</sub> [M+H]<sup>+</sup> 271.0965; found: 271.0976.

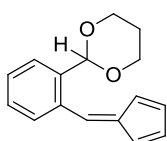

**Fulvene 3d:** eluent for column chromatography: hexanes/diethyl ether (9:1 v/v); (56%); red oil;  $\nu_{\text{max}}$  (Neat)/cm<sup>-1</sup> 1602 (w), 1466 (m), 1376 (m);  $\delta_{\text{H}}$  (400 MHz, CDCl<sub>3</sub>) 1.44-1.47 (1H, m), 2.20-2.32 (1H, m), 3.98 (2H, td,  $J$  = 2.4, 12.0 Hz), 4.28 (2H, dd,  $J$  = 4.0, 10.8 Hz), 5.67 (1H, s), 6.38 (1H, dt,  $J$  = 1.7, 5.2 Hz), 6.47-6.49 (1H, m), 6.56-6.58 (1H, m), 6.62-6.65 (1H, m), 7.38-7.40 (2H, m), 7.46-7.48 (1H, m), 7.63 (1H, s), 7.67-7.69 (1H, m);  $\delta_{\text{C}}$  (100 MHz, CDCl<sub>3</sub>) 25.8, 67.6, 100.2, 121.4,

126.3, 126.4, 128.7, 128.9, 131.6, 132.0, 134.8, 134.9 (s), 136.2, 137.4 (s), 146.5 (s); HRMS (ESI)  $m/z$  calcd for  $C_{16}H_{17}O_2$   $[M+H]^+$  241.1223; found: 241.1217.

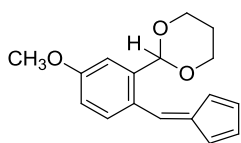

**Fulvene 3e:** eluent for column chromatography: hexanes/diethyl ether (9:1 v/v); (84%); red oil;  $\nu_{\max}$  (Neat)/ $\text{cm}^{-1}$  1602 (vs), 1498 (s), 1466 (m);  $\delta_{\text{H}}$  (300 MHz,  $\text{CDCl}_3$ ) 1.44-1.49 (1H, m), 2.20-2.33 (1H, m), 3.87 (3H, s), 3.99 (2H, td,  $J = 1.8, 12.0$  Hz), 4.28 (2H, dd,  $J = 4.8, 10.8$  Hz), 5.67 (1H, s), 6.38 (1H, dt,  $J = 1.5, 5.1$  Hz), 6.52-6.56 (2H, m), 6.62-6.66 (1H, m), 6.93 (1H, dd,  $J = 2.7, 8.4$  Hz), 7.25 (1H, d,  $J = 2.7$  Hz), 7.48 (1H, d,  $J = 8.4$  Hz), 7.55 (1H, s);  $\delta_{\text{C}}$  (75 MHz,  $\text{CDCl}_3$ ) 25.7, 55.5, 67.6, 99.7, 111.3, 114.9, 121.1, 126.5, 127.3 (s), 130.8, 133.7, 134.5, 136.0, 139.1 (s), 145.1 (s), 160.4 (s); HRMS (ESI)  $m/z$  calcd for  $C_{17}H_{19}O_3$   $[M+H]^+$  271.1329; found: 271.1339.

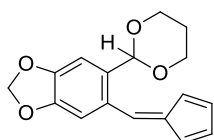

**Fulvene 3f:** eluent for column chromatography: hexanes/diethyl ether (9:1 v/v); (74%); red oil;  $\nu_{\max}$  (Neat)/ $\text{cm}^{-1}$  1602 (vs), 1503 (vs), 1486 (vs);  $\delta_{\text{H}}$  (300 MHz,  $\text{CDCl}_3$ ) 1.40-1.45 (1H, m), 2.14-2.30 (1H, m), 3.96 (2H, td,  $J = 1.8, 12.3$  Hz), 4.25 (2H, dd,  $J = 4.8, 10.8$  Hz), 5.63 (1H, s), 5.98 (2H, s), 6.37-6.39 (1H, m), 6.55-6.57 (2H, m), 6.66-6.68 (1H, m), 7.05 (1H, s), 7.23 (1H, s), 7.51 (1H, s);  $\delta_{\text{C}}$  (75 MHz,  $\text{CDCl}_3$ ) 25.5, 67.3, 99.2, 101.4, 106.9, 111.3, 120.6, 126.4, 128.6 (s), 130.9, 132.7 (s), 134.8, 135.4, 145.4 (s), 147.6 (s), 148.2 (s); HRMS (ESI)  $m/z$  calcd for  $C_{17}H_{17}O_4$   $[M+H]^+$  285.1121; found: 285.1131.

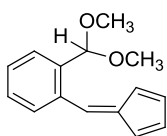

**Fulvene 24a:** eluent for column chromatography: hexanes/diethyl ether (9:1 v/v); (68%); red oil;  $\nu_{\max}$  (Neat)/ $\text{cm}^{-1}$  1626 (vs), 1599 (vs), 1484 (vs);  $\delta_{\text{H}}$  (400 MHz,  $\text{CDCl}_3$ ) 3.31 (6H, s), 5.52 (1H, s), 6.37-6.39 (1H, m), 6.46-6.49 (1H, m), 6.54-6.56 (1H, m), 6.62-6.65 (1H, m), 7.37-7.40 (2H, m), 7.48-7.50 (1H, m), 7.62-7.63 (2H, m);  $\delta_{\text{C}}$  (100 MHz,  $\text{CDCl}_3$ ) 53.0, 101.5, 121.1, 126.5, 127.0, 128.4, 131.5, 132.2, 135.0, 135.3 (s), 136.2, 136.8 (s), 146.3 (s); HRMS (ESI)  $m/z$  calcd for  $C_{14}H_{13}O$   $[M+H-OCH_4]^+$  197.0966; found: 197.0959.

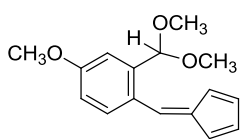

**Fulvene 24b:** eluent for column chromatography: hexanes/diethyl ether (9:1 v/v); (71%); red oil;  $\nu_{\max}$  (Neat)/ $\text{cm}^{-1}$  1600 (vs), 1493 (vs), 1305 (vs);  $\delta_{\text{H}}$  (400 MHz,  $\text{CDCl}_3$ ) 3.33 (6H, s), 3.87 (3H, s), 5.55 (1H, s), 6.37-6.39 (1H, m), 6.53-6.54 (2H, m), 6.64-6.65 (1H, m), 6.93 (1H, dd,  $J = 2.4, 8.4$  Hz),

7.23 (1H, d,  $J = 2.3$  Hz), 7.52 (1H, d,  $J = 8.4$  Hz), 7.60 (1H, s);  $\delta_C$  (100 MHz,  $CDCl_3$ ) 53.0, 55.4, 101.2, 112.6, 114.0, 120.8, 126.6, 127.8 (s), 130.7, 133.8, 134.6, 136.0, 138.7 (s), 145.0 (s), 160.1 (s); HRMS (ESI)  $m/z$  calcd for  $C_{15}H_{10}O_2$   $[M+H-OCH_4]^+$  227.1062; found: 227.1067.

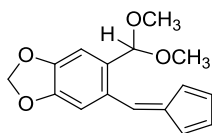

**Fulvene 24c:** eluent for column chromatography: hexanes/diethyl ether (9:1 v/v); (81%); red oil;  $\nu_{max}$  (Neat)/ $cm^{-1}$  1601 (m), 1502 (s), 1482 (vs);  $\delta_H$  (400 MHz,  $CDCl_3$ ) 3.30 (6H, s), 5.50 (1H, s), 6.01 (2H, s), 6.34-6.36 (1H, m), 6.51-6.53 (2H, m), 6.63-6.67 (1H, m), 7.04 (1H, s), 7.16 (1H, s), 7.52 (1H, s);  $\delta_C$  (100 MHz,  $CDCl_3$ ) 52.9, 100.7, 101.6, 107.6, 111.8, 120.6, 126.8, 129.3 (s), 131.0, 132.2 (s), 135.0, 135.6, 145.3 (s), 147.5 (s), 148.2 (s); HRMS (ESI)  $m/z$  calcd for  $C_{15}H_{13}O_3$   $[M+H-OCH_4]^+$  241.0865; found: 241.0867.

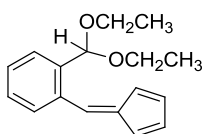

**Fulvene 24d:** eluent for column chromatography: hexanes/diethyl ether (9:1 v/v); (74%); red oil;  $\nu_{max}$  (Neat)/ $cm^{-1}$  1626 (m), 1481 (m), 1373 (m);  $\delta_H$  (400 MHz,  $CDCl_3$ ) 1.21 (6H, t,  $J = 7.2$  Hz), 3.50-3.63 (4H, m), 5.67 (1H, s), 6.39-6.40 (1H, m), 6.47-6.49 (1H, m), 6.55-6.57 (1H, m), 6.63-6.65 (1H, m), 7.37-7.40 (2H, m), 7.48-7.50 (1H, m), 7.67-7.69 (2H, m);  $\delta_C$  (100 MHz,  $CDCl_3$ ) 15.2, 61.3, 99.7, 121.2, 126.4, 126.7, 128.3, 128.5, 131.4, 132.1, 134.9, 135.2 (s), 136.5, 137.8 (s), 146.1 (s); HRMS (ESI)  $m/z$  calcd for  $C_{15}H_{15}O$   $[M+H-OC_2H_6]^+$  211.1123; found: 211.1124.

### Procedure for the preparation of benz[*f*]indenes **5**, **6**, **25** and **26**

A solution of the fulvene **3** or **24** (1 mmol) in dimethylsulfoxide (5 mL) was heated by microwave at 120 °C and at 120 W for 20–40 min. Then, the reaction mixture was poured into water (10 mL) and extracted with dichloromethane ( $3 \times 10$  mL). The organic layer was washed with water ( $3 \times 10$  mL) and dried over anhydrous  $MgSO_4$ . The solvent was evaporated and the resulting material was purified by column chromatography on silica gel.

**Benz[*f*]indenes 5a and 6a:** eluent for column chromatography: hexanes/diethyl ether (4:1 v/v); (34%).

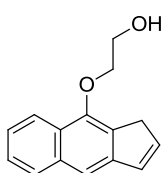

**9-(2-Hydroxy)ethoxybenz[*f*]indene (5a):** yellow oil;  $\nu_{max}$  (Neat)/ $cm^{-1}$  3384 (s), 1683 (m), 1579 (s);  $\delta_H$  (300 MHz,  $CDCl_3$ ) 2.36 (1H, br s), 3.60 (2H, t,  $J$

= 2.0 Hz), 4.05 (2H, t,  $J = 4.4$  Hz), 4.33 (2H, t,  $J = 4.4$  Hz), 6.61 (1H, dt,  $J = 2.0, 5.6$  Hz), 6.95 (1H, dt,  $J = 2.0, 5.6$  Hz), 7.44-7.49 (2H, m), 7.60 (1H, s), 7.85-7.87 (1H, m), 8.19-8.22 (1H, m);  $\delta_C$  (75 MHz,  $CDCl_3$ ) 36.5, 62.5, 73.8, 115.1, 121.8, 124.9, 125.7, 126.1 (s), 128.1, 128.7 (s), 132.2, 134.9 (s), 135.3, 145.2 (s), 149.4 (s); HRMS (ESI)  $m/z$  calcd for  $C_{15}H_{15}O_2$   $[M+H]^+$  227.1067; found: 227.1067.

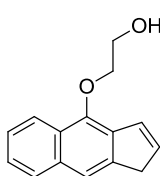

**4-(2-Hydroxy)ethoxybenz[f]indene (6a):** yellow oil;  $\nu_{max}$  (Neat)/ $cm^{-1}$  3384 (m), 1579 (m), 1398 (m);  $\delta_H$  (300 MHz,  $CDCl_3$ ) 2.09 (1H, br s), 3.56-3.57 (2H, m), 4.05 (2H, t,  $J = 5.0$  Hz), 4.30 (2H, t,  $J = 5.0$  Hz), 6.59 (1H, dt,  $J = 2.1, 5.7$  Hz), 7.16-7.19 (1H, m), 7.41-7.50 (2H, m), 7.69 (1H, s), 7.82-7.85 (1H, m), 8.20-8.23 (1H, m);  $\delta_C$  (75 MHz,  $CDCl_3$ ) 38.7, 62.5, 75.8, 118.6, 121.8, 125.2, 125.3, 127.1 (s), 128.0, 128.5, 133.3 (s), 133.4 (s), 135.0, 143.0 (s), 146.6 (s); HRMS (ESI)  $m/z$  calcd for  $C_{15}H_{15}O_2$   $[M+H]^+$  227.1067; found: 227.1068.

**Benz[f]indenes 5b and 6b:** eluent for column chromatography: hexanes/diethyl ether (9:1 v/v), (30%).

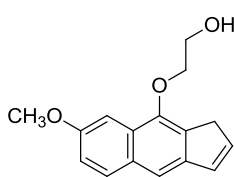

**9-(2-Hydroxy)ethoxy-7-methoxybenz[f]indene (5b):** yellow oil;  $\nu_{max}$  (Neat)/ $cm^{-1}$  3454 (m), 1618 (vs), 1500 (s);  $\delta_H$  (300 MHz,  $CDCl_3$ ) 2.00 (1H, br s), 3.59 (2H, t,  $J = 1.8$  Hz), 3.94 (3H, s), 4.05 (2H, t,  $J = 5.0$  Hz), 4.30 (2H, t,  $J = 5.0$  Hz), 6.53-6.56 (1H, m), 6.91-6.94 (1H, m), 7.13 (1H, dd,  $J = 2.7, 9.0$  Hz), 7.53 (1H, s), 7.54 (1H, d,  $J = 2.7$  Hz), 7.76 (1H, d,  $J = 9.0$  Hz);  $\delta_C$  (75 MHz,  $CDCl_3$ ) 36.4, 55.4, 62.6, 73.6, 100.6, 115.1, 118.1, 127.3 (s), 129.6, 129.9 (s), 130.3 (s), 132.2, 134.0, 143.1 (s), 148.7 (s), 157.4 (s); HRMS (ESI)  $m/z$  calcd for  $C_{16}H_{17}O_3$   $[M+H]^+$  257.1172; found: 257.1179.

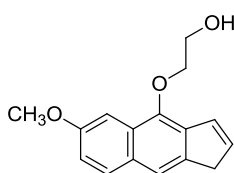

**4-(2-Hydroxy)ethoxy-6-methoxybenz[f]indene (6b):** yellow oil;  $\nu_{max}$  (Neat)/ $cm^{-1}$  3423 (s), 1617 (vs), 1501 (s);  $\delta_H$  (300 MHz,  $CDCl_3$ ) 1.86 (1H, br s), 3.53-3.54 (2H, m), 3.95 (3H, s), 4.05 (2H, t,  $J = 4.8$  Hz), 4.28 (2H, t,  $J = 4.8$  Hz), 6.58-6.61 (1H, m), 7.11 (1H, dd,  $J = 2.7, 9.0$  Hz), 7.15-7.17 (1H, m), 7.54 (1H, d,  $J = 2.7$  Hz), 7.62 (1H, s), 7.73 (1H, d,  $J = 9.0$  Hz);  $\delta_C$  (75 MHz,  $CDCl_3$ ) 38.6, 55.4, 62.6, 75.5, 100.2, 117.8, 118.4, 128.1 (s), 128.4, 128.9 (s), 129.5, 134.0 (s), 135.2, 140.5 (s), 145.9 (s), 157.5 (s); HRMS (ESI)  $m/z$  calcd for  $C_{16}H_{17}O_3$   $[M+H]^+$  257.1172; found: 257.1182.

**Benz[f]indenes 5c and 6c:** eluent for column chromatography: hexanes/diethyl ether (9:1 v/v), (45%).

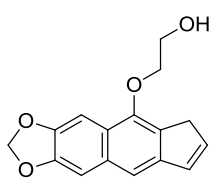

**9-(2-Hydroxyethoxy)-6,7-(methylenedioxy)benz[f]indene (5c):**

yellow oil;  $\nu_{\max}$  (Neat)/ $\text{cm}^{-1}$  3317 (m), 1498 (s), 1298 (s);  $\delta_{\text{H}}$  (400 MHz,  $\text{CDCl}_3$ ) 2.11 (1H, br s), 3.56 (2H, t,  $J = 2.0$  Hz), 4.04 (2H, t,  $J = 4.8$  Hz), 4.29 (2H, t,  $J = 4.8$  Hz), 6.04 (2H, s), 6.55 (1H, dt,  $J = 2.0, 5.6$  Hz), 6.89 (1H, dt,  $J = 2.0, 5.6$  Hz), 7.14 (1H, s), 7.43 (1H, s), 7.51 (1H, s);  $\delta_{\text{C}}$  (100 MHz,  $\text{CDCl}_3$ ) 36.4, 62.5, 73.6, 98.7, 101.1, 104.3, 114.3, 122.7 (s), 127.9 (s), 131.8 (s), 132.1, 134.3, 144.0 (s), 147.2 (s), 147.5 (s), 149.2 (s); HRMS (ESI)  $m/z$  calcd for  $\text{C}_{16}\text{H}_{15}\text{O}_4$   $[\text{M}+\text{H}]^+$  271.0965; found: 271.0973.

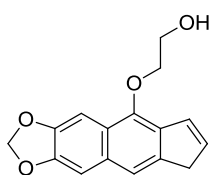

**4-(2-Hydroxyethoxy)-6,7-(methylenedioxy)benz[f]indene (6c):**

yellow oil;  $\nu_{\max}$  (Neat)/ $\text{cm}^{-1}$  3503 (m), 1498 (m), 1462 (vs);  $\delta_{\text{H}}$  (400 MHz,  $\text{CDCl}_3$ ) 2.01 (1H, br s), 3.50-3.52 (2H, m), 4.04 (2H, t,  $J = 4.8$  Hz), 4.24 (2H, t,  $J = 4.8$  Hz), 6.04 (2H, s), 6.52 (1H, dd,  $J = 2.4, 5.6$  Hz), 7.11-7.12 (2H, m), 7.51-7.52 (2H, m);  $\delta_{\text{C}}$  (100 MHz,  $\text{CDCl}_3$ ) 38.6, 62.5, 75.6, 98.5, 101.1, 104.2, 117.9, 123.6 (s), 128.4, 130.3 (s), 132.3 (s), 134.0, 141.8 (s), 146.4 (s), 147.2 (s), 147.4 (s); HRMS (ESI)  $m/z$  calcd for  $\text{C}_{16}\text{H}_{15}\text{O}_4$   $[\text{M}+\text{H}]^+$  271.0965; found: 271.0972.

**Benz[f]indenes 5d and 6d:** eluent for column chromatography: hexanes/diethyl ether (4:1 v/v), (57%).

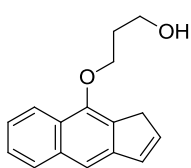

**9-(3-Hydroxypropoxy)benz[f]indene (5d):** white oil;  $\nu_{\max}$  (Neat)/ $\text{cm}^{-1}$

3373 (s), 1692 (m), 1579 (vs);  $\delta_{\text{H}}$  (300 MHz,  $\text{CDCl}_3$ ) 2.02 (1H, br s), 2.17 (2H, quint,  $J = 5.7$  Hz), 3.63 (2H, t,  $J = 2.1$  Hz), 4.03 (2H, t,  $J = 6.0$  Hz), 4.40 (2H, t,  $J = 6.0$  Hz), 6.61 (1H, dt,  $J = 2.1, 5.5$  Hz), 6.95 (1H, dt,  $J = 2.1, 5.5$  Hz), 7.42-7.48 (2H, m), 7.57 (1H, s), 7.83-7.86 (1H, m), 8.16-8.19 (1H, m);  $\delta_{\text{C}}$  (75 MHz,  $\text{CDCl}_3$ ) 33.1, 36.6, 61.0, 70.9, 114.9, 121.9, 124.8, 125.6, 126.2 (s), 128.0, 128.3 (s), 132.2, 134.9 (s), 135.3, 145.3 (s), 149.7 (s); HRMS (ESI)  $m/z$  calcd for  $\text{C}_{16}\text{H}_{17}\text{O}_2$   $[\text{M}+\text{H}]^+$  241.1223; found: 241.1230.

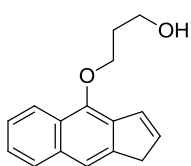

**4-(3-Hydroxypropoxy)benz[f]indene (6d):** white oil;  $\nu_{\max}$  (Neat)/ $\text{cm}^{-1}$

3386 (m), 1581 (m), 1363 (vs);  $\delta_{\text{H}}$  (300 MHz,  $\text{CDCl}_3$ ) 2.18 (2H, quint,  $J = 6.0$  Hz), 2.30 (1H, br s), 3.55 (2H, br s), 4.04 (2H, t,  $J = 6.0$  Hz), 4.34

(2H, t,  $J = 6.0$  Hz), 6.58 (1H, dt,  $J = 2.1, 5.4$  Hz), 7.17-7.19 (1H, m), 7.42-7.51 (2H, m), 7.67 (1H, s), 7.82-7.85 (1H, m), 8.19-8.22 (1H, m);  $\delta_{\text{C}}$  (75 MHz,  $\text{CDCl}_3$ ) 33.1, 38.6, 61.0, 73.0, 118.3, 121.9, 125.0, 125.2, 127.0 (s), 127.8, 128.6, 133.0 (s), 133.3 (s), 134.7, 142.9 (s), 146.9 (s); HRMS (ESI)  $m/z$  calcd for  $\text{C}_{16}\text{H}_{17}\text{O}_2$   $[\text{M}+\text{H}]^+$  241.1223; found: 241.1231.

**Benz[f]indenes 5e and 6e:** eluent for column chromatography: hexanes/diethyl ether (4:1 v/v), (46%).

**9-(3-Hydroxy)propoxy-7-methoxybenz[f]-indene (5e) and 4-(3-hydroxy)propoxy-6-methoxybenz[f]indene (6e):** white oil;  $\nu_{\text{max}}$  (Neat)/ $\text{cm}^{-1}$  3417 (m), 1617 (vs), 1500 (vs);  $\delta_{\text{H}}$  (300 MHz,  $\text{CDCl}_3$ ) 2.10-2.21 (4H, m)<sub>minor+major</sub>, 2.49 (2H, br s)<sub>minor+major</sub>, 3.50-3.51 (2H, m)<sub>minor+major</sub>, 3.57 (2H, t,  $J = 2.1$  Hz)<sub>major</sub>, 3.94 (3H, s)<sub>major</sub>, 3.95 (3H, s)<sub>minor</sub>, 4.00-4.03 (4H, m)<sub>minor+major</sub>, 4.28-4.35 (4H, m)<sub>minor+major</sub>, 6.51-6.58 (2H, m)<sub>minor+major</sub>, 6.91 (1H, dt,  $J = 2.1, 5.4$  Hz)<sub>major</sub>, 7.10-7.16 (2H, m)<sub>minor+major</sub>, 7.49-7.51 (4H, m)<sub>minor+major</sub>, 7.57 (1H, s)<sub>minor</sub>, 7.71 (1H, d,  $J = 9.0$  Hz)<sub>minor</sub>, 7.73 (1H, d,  $J = 9.0$  Hz)<sub>major</sub>;  $\delta_{\text{C}}$  (75 MHz,  $\text{CDCl}_3$ ) 33.1, 36.4, 38.5, 55.3, 60.7, 60.8, 70.3, 72.5, 100.3, 100.5, 114.7, 117.6, 117.8, 118.1, 127.1 (s), 127.9 (s), 128.5, 128.8 (s), 129.2 (s), 129.3, 129.5, 130.1 (s), 132.1, 133.6 (s), 133.9, 134.9, 140.4 (s), 143.1 (s), 146.0 (s), 148.8 (s), 157.1 (s), 157.3 (s); HRMS (ESI)  $m/z$  calcd for  $\text{C}_{17}\text{H}_{18}\text{NaO}_3$   $[\text{M}+\text{Na}]^+$  293.1154; found: 293.1153.

**Benz[f]indenes 5f and 6f:** eluent for column chromatography: hexanes/diethyl ether (4:1 v/v), (53%).

**9-(3-Hydroxy)propoxy-6,7-(methylenedioxy)benz[f]indene (5f):** white oil;  $\nu_{\text{max}}$  (Neat)/ $\text{cm}^{-1}$  3382 (m), 1617 (m), 1497 (s);  $\delta_{\text{H}}$  (300 MHz,  $\text{CDCl}_3$ ) 2.09-2.18 (3H, m), 3.57 (2H, t,  $J = 1.8$  Hz), 4.00 (2H, t,  $J = 6.0$  Hz), 4.33 (2H, t,  $J = 6.0$  Hz), 6.02 (2H, s), 6.53 (1H, dt,  $J = 1.8, 5.7$  Hz), 6.88 (1H, dt,  $J = 1.8, 5.7$  Hz), 7.12 (1H, br s), 7.40 (1H, s), 7.47 (1H, s);  $\delta_{\text{C}}$  (75 MHz,  $\text{CDCl}_3$ ) 33.1, 36.5, 60.9, 70.6, 98.8, 101.0, 104.2, 122.7 (s), 127.6 (s), 131.8 (s), 132.1, 134.3, 144.1 (s), 147.0 (s), 147.4 (s), 149.5 (s); HRMS (ESI)  $m/z$  calcd for  $\text{C}_{17}\text{H}_{16}\text{NaO}_4$   $[\text{M}+\text{Na}]^+$  307.0946; found: 307.0950.



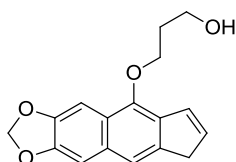

**4-(3-Hydroxy)propoxy-6,7-(methylenedioxy)benz[f]indene (6f):**

white oil;  $\nu_{\max}$  (Neat)/ $\text{cm}^{-1}$  3384 (m), 1498 (s), 1460 (vs);  $\delta_{\text{H}}$  (300 MHz,  $\text{CDCl}_3$ ) 1.86 (1H, br s), 2.16 (2H, quint,  $J = 5.7$  Hz), 3.49-3.51 (2H, m), 4.03 (2H, t,  $J = 5.7$  Hz), 4.28 (2H, t,  $J = 5.7$  Hz), 6.03 (2H, s), 6.51 (1H, dt,  $J = 2.1, 5.7$  Hz), 7.10-7.12 (2H, m), 7.48 (1H, s), 7.50 (1H, s);  $\delta_{\text{C}}$  (75 MHz,  $\text{CDCl}_3$ ) 33.1, 38.6, 61.1, 72.9, 98.7, 101.1, 104.1, 117.8, 123.6 (s), 128.5, 130.3 (s), 132.2 (s), 133.8, 141.8 (s), 146.7 (s), 147.2 (s), 147.3 (s); HRMS (ESI)  $m/z$  calcd for  $\text{C}_{17}\text{H}_{16}\text{NaO}_4$   $[\text{M}+\text{Na}]^+$  307.0946; found: 307.0947.

**Benz[f]indenes 25a and 26a:** eluent for column chromatography: hexanes/diethyl ether (4:1 v/v), (54%).

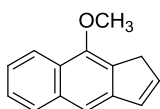

**9-Methoxybenz[f]indene (25a):** white oil;  $\nu_{\max}$  (Neat) / $\text{cm}^{-1}$  1632 (m), 1579

(vs), 1499 (s);  $\delta_{\text{H}}$  (300 MHz,  $\text{CDCl}_3$ ) 3.64 (2H, t,  $J = 2.1$  Hz), 4.10 (3H, s), 6.62 (1H, dt,  $J = 1.5, 5.4$  Hz), 6.95 (1H, dt,  $J = 1.5, 5.7$  Hz), 7.44-7.47 (2H, m), 7.57 (1H, s), 7.83-7.86 (1H, m), 8.19-8.22 (1H, m);  $\delta_{\text{C}}$  (75 MHz,  $\text{CDCl}_3$ ) 36.6, 60.2, 114.7, 122.1, 124.7, 125.7, 126.1 (s), 127.7 (s), 127.9, 132.3, 134.9 (s), 135.3, 145.4 (s), 150.9 (s); HRMS (ESI)  $m/z$  calcd for  $\text{C}_{14}\text{H}_{13}\text{O}$   $[\text{M}+\text{H}]^+$  197.0966; found: 197.0960.

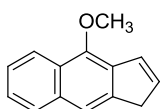

**4-Methoxybenz[f]indene (26a):**  $\delta_{\text{H}}$  (300 MHz,  $\text{CDCl}_3$ ) 3.57-3.59 (2H, br

s), 4.13 (3H, s), 6.60 (1H, dt,  $J = 1.5, 4.2$  Hz), 7.22-7.25 (1H, m), 7.47-7.52 (2H, m), 7.69 (1H, s), 7.85-7.89 (1H, m), 8.24-8.28 (1H, m);  $\delta_{\text{C}}$  (75 MHz,  $\text{CDCl}_3$ ) 38.5, 62.2, 118.1, 122.0, 124.9, 125.3, 126.9 (s), 127.8, 128.7, 132.4 (s), 133.4 (s), 134.5, 143.1 (s), 148.1 (s). HRMS (ESI)  $m/z$  calcd for  $\text{C}_{14}\text{H}_{13}\text{O}$   $[\text{M}+\text{H}]^+$  197.0966; found: 197.0962.

**Benz[f]indenes 25b and 26b:** eluent for column chromatography: hexanes/diethyl ether (4:1 v/v), (42%).

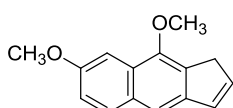

**7,9-Dimethoxybenz[f]indene (25b):** white oil;  $\nu_{\max}$  (Neat)/ $\text{cm}^{-1}$  1617

(s), 1501 (m), 1465 (m);  $\delta_{\text{H}}$  (400 MHz,  $\text{CDCl}_3$ ) 3.64 (2H, t,  $J = 2.0$  Hz), 3.96 (3H, s), 4.11 (3H, s), 6.54-6.57 (1H, m), 6.92-6.94 (1H, m), 7.13 (1H, dd,  $J = 2.8, 8.8$  Hz), 7.51 (1H, d,  $J = 2.8$  Hz), 7.51 (1H, s), 7.75 (1H, d,  $J = 8.8$  Hz);  $\delta_{\text{C}}$  (100 MHz,  $\text{CDCl}_3$ ) 36.5, 55.4, 59.9, 100.5, 114.5, 118.1, 127.0 (s), 128.5 (s), 129.4, 130.2 (s), 132.2, 134.0, 143.2 (s), 150.1 (s), 157.2 (s); HRMS (ESI)  $m/z$  calcd for  $\text{C}_{15}\text{H}_{15}\text{O}_2$   $[\text{M}+\text{H}]^+$  227.1072; found: 227.1062.

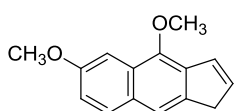

**4,6-Dimethoxybenz[f]indene (26b):** white oil;  $\nu_{\max}$  (Neat)/ $\text{cm}^{-1}$  1617 (vs), 1502 (s), 1466 (s);  $\delta_{\text{H}}$  (300 MHz,  $\text{CDCl}_3$ ) 3.52-3.54 (2H, m), 3.96 (3H, s), 4.09 (3H, s), 6.58 (1H, dt,  $J = 2.1, 5.7$  Hz), 7.11 (1H, dd,  $J = 2.7, 9.0$  Hz), 7.17-7.20 (1H, m), 7.51 (1H, d,  $J = 2.7$  Hz), 7.60 (1H, s), 7.73 (1H, d,  $J = 9.0$  Hz);  $\delta_{\text{C}}$  (75 MHz,  $\text{CDCl}_3$ ) 38.5, 55.4, 61.9, 100.3, 117.8, 117.9, 127.8 (s), 128.7, 128.8 (s), 129.3, 133.1 (s), 134.7, 140.6 (s), 147.4 (s), 157.4 (s); HRMS (ESI)  $m/z$  calcd for  $\text{C}_{15}\text{H}_{15}\text{O}_2$   $[\text{M}+\text{H}]^+$  227.1072; found: 227.1068.

**Benz[f]indenes 25c and 26c:** eluent for column chromatography: hexanes/diethyl ether (4:1 v/v), (47%).

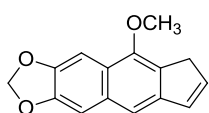

**9-Methoxy-6,7-(methylenedioxy)benz[f]indene (25c):** white oil;  $\nu_{\max}$  (Neat)/ $\text{cm}^{-1}$  1499 (m), 1464 (vs), 1299 (m);  $\delta_{\text{H}}$  (400 MHz,  $\text{CDCl}_3$ ) 3.60 (2H, t,  $J = 2.4$  Hz), 4.06 (3H, s), 6.03 (2H, s), 6.55 (1H, dt,  $J = 2.0, 5.6$  Hz), 6.90 (1H, dt,  $J = 2.0, 5.6$  Hz), 7.13 (1H, s), 7.41 (1H, s), 7.50 (1H, s);  $\delta_{\text{C}}$  (100 MHz,  $\text{CDCl}_3$ ) 36.5, 60.1, 98.9, 101.1, 104.1, 114.2, 122.6 (s), 127.1 (s), 131.8 (s), 132.1, 134.3, 144.2 (s), 147.0 (s), 147.5 (s), 150.6 (s); HRMS (ESI)  $m/z$  calcd for  $\text{C}_{15}\text{H}_{13}\text{O}_3$   $[\text{M}+\text{H}]^+$  241.0865; found: 241.0851.

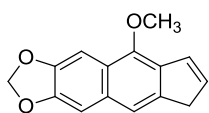

**4-Methoxy-6,7-(methylenedioxy)benz[f]indene (26c):** white oil;  $\nu_{\max}$  (Neat)/ $\text{cm}^{-1}$  1499 (m), 1465 (vs), 1300 (m);  $\delta_{\text{H}}$  (300 MHz,  $\text{CDCl}_3$ ) 3.50-3.51 (2H, m), 4.03 (3H, s), 6.03 (2H, s), 6.51 (1H, dt,  $J = 2.1, 5.7$  Hz), 7.11-7.14 (2H, m), 7.50 (2H, m);  $\delta_{\text{C}}$  (75 MHz,  $\text{CDCl}_3$ ) 38.6, 62.1, 98.8, 101.1, 104.1, 114.1 (s), 117.6, 123.5 (s), 128.6, 130.3 (s), 131.7 (s), 133.6, 141.9 (s), 147.3 (s), 148.0 (s); HRMS (ESI)  $m/z$  calcd for  $\text{C}_{15}\text{H}_{13}\text{O}_3$   $[\text{M}+\text{H}]^+$  241.0865; found: 241.0852.

**Benz[f]indenes 25d and 26d:** eluent for column chromatography: hexanes/diethyl ether (4:1 v/v), (60%).

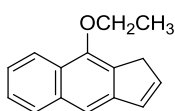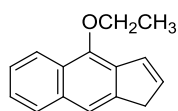

**9-Ethoxybenz[f]indene (25d) and 4-ethoxybenz[f]indene (26d):** white oil;  $\nu_{\max}$  (Neat)/ $\text{cm}^{-1}$  1607 (m), 1580 (vs), 1418 (vs);  $\delta_{\text{H}}$  (300 MHz,  $\text{CDCl}_3$ ) 1.55 (6H, t,  $J = 7.2$  Hz)<sub>minor+major</sub>, 3.58 (2H, br s)<sub>minor</sub>, 3.64 (6H, t,  $J = 2.1$  Hz)<sub>major</sub>, 4.28-4.38 (4H, m)<sub>minor+major</sub>, 6.56-6.60 (1H, m)<sub>minor</sub>, 6.61-6.65 (1H, m)<sub>major</sub>, 6.97 (1H, dt,  $J = 1.8, 5.4$  Hz)<sub>major</sub>, 7.17-7.20 (1H, m)<sub>minor</sub>, 7.45-7.50 (4H, m)<sub>minor+major</sub>, 7.59 (1H, s)<sub>major</sub>, 7.68 (1H,

s)<sub>minor</sub>, 7.83-7.88 (2H, m)<sub>minor+major</sub>, 8.21-8.28 (2H, m)<sub>minor+major</sub>;  $\delta_C$  (75 MHz, CDCl<sub>3</sub>) 16.0, 16.1, 36.7, 38.6, 68.3, 70.5, 114.6, 118.0, 122.3, 124.6, 124.8, 125.2, 125.5, 126.6 (s), 127.4 (s), 127.8, 127.9, 128.3 (s), 129.0, 132.2, 133.1 (s), 133.4 (s), 134.2, 134.9 (s), 135.2, 143.0 (s), 145.3 (s), 147.2 (s), 150.0 (s); HRMS (ESI)  $m/z$  calcd for C<sub>15</sub>H<sub>15</sub>O [M+H]<sup>+</sup> 211.1123; found: 211.1124.

#### **Procedure for the preparation of 2-(1,3-dioxolan-2-yl)benzaldehyde-formyl-*d***

*n*-BuLi (12.3 mL, 2.6 M in hexane) was added dropwise to a solution of 2-(2-bromophenyl)-1,3-dioxolane (3.0 g, 12.3 mmol) in anhydrous tetrahydrofuran (50 mL), at -78 °C under an atmosphere of nitrogen. The mixture was stirred at -78 °C for 30 min. Then, a solution of *N*-formylpiperidine-*d*<sub>7</sub> (1.4 gr, 12.3 mmol) in tetrahydrofuran (10 mL) was added dropwise. The mixture was stirred at -78 °C for 15 min, warmed to room temperature and stirred for 3 h. Then, the reaction was quenched with the addition of water (25 mL) and extracted with ethyl acetate (2 × 30 mL). The combined organic layers were washed with water (2 × 100 mL) and dried over anhydrous MgSO<sub>4</sub>. The solvent was removed under reduced pressure and the resulting oil was purified by silica gel column chromatography using hexanes/diethyl ether (3:2 v/v) as eluent.

**2-(1,3-Dioxolan-2-yl)benzaldehyde formyl-*d***: (72%); yellow oil;  $\nu_{\max}$  (Neat)/cm<sup>-1</sup> 1673 (vs), 1599 (vs), 1407 (m);  $\delta_H$  (400 MHz, CDCl<sub>3</sub>) 4.07-4.16 (4H, m), 6.39 (1H, s), 7.52 (1H, t,  $J$  = 7.6 Hz), 7.61 (1H, t,  $J$  = 7.6 Hz), 7.72 (1H, dd,  $J$  = 7.6, 1.2 Hz), 7.93 (1H, dd,  $J$  = 7.6, 1.2 Hz);  $\delta_C$  (100 MHz, CDCl<sub>3</sub>) 65.4, 101.2, 127.0, 129.5, 130.1, 133.7, 134.4 (t,  $J_{CD}$  = 3.5 Hz) (s), 139.1 (s), 191.5 (t,  $J_{CD}$  = 27.2 Hz); HRMS (ESI)  $m/z$  calcd for C<sub>10</sub>H<sub>10</sub>DO<sub>3</sub> [M+H]<sup>+</sup> 180.0771; found: 180.0777.

#### **Procedure for the preparation of the fulvenes 14 and 20**

To a solution of the appropriate benzaldehyde (3 mmol) in anhydrous methanol (15 mL) were added cyclopentadiene (6 mmol) and pyrrolidine (6 mmol). The reaction mixture was stirred at room temperature overnight. Then, the reaction mixture was acidified with acetic acid (1 mL), diluted with water (40 mL) and extracted with diethyl ether (3 × 20 mL). The organic layer was washed with brine (2 × 10 mL), dried over anhydrous MgSO<sub>4</sub>, filtered and evaporated under reduced pressure. The resulting residue was purified by silica gel column chromatography.

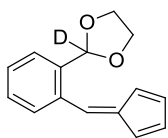

**Fulvene 14:** eluent for column chromatography: hexanes/diethyl ether (9:1 v/v); (77%); red oil;  $\nu_{\max}$  (Neat)/ $\text{cm}^{-1}$  1626 (w), 1482 (m), 1229 (s);  $\delta_{\text{H}}$  (400 MHz,  $\text{CDCl}_3$ ) 4.03-4.17 (4H, m), 6.37 (1H, td,  $J = 2.0, 5.2$  Hz), 6.48-6.50 (1H, m), 6.55-6.57 (1H, m), 6.63-6.65 (1H, m), 7.38-7.44 (2H, m), 7.50-7.52 (1H, m), 7.63-7.65 (1H, m);  $\delta_{\text{C}}$  (100 MHz,  $\text{CDCl}_3$ ) 65.5, 101.6 (t,  $J_{\text{CD}} = 25.5$  Hz), 121.2, 126.2, 126.3, 128.8, 129.0, 131.7, 132.2, 135.1, 135.7 (s), 135.8, 136.4 (s), 146.6 (s); HRMS (ESI)  $m/z$  calcd for  $\text{C}_{15}\text{H}_{14}\text{DO}_2$   $[\text{M}+\text{H}]^+$  228.1135; found: 228.1136.

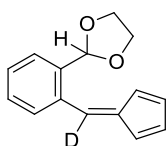

**Fulvene 20:** eluent for column chromatography: hexanes/diethyl ether (9:1 v/v); (77%); red oil;  $\nu_{\max}$  (Neat)/ $\text{cm}^{-1}$  1616 (m), 1484 (m), 1361 (s);  $\delta_{\text{H}}$  (300 MHz,  $\text{CDCl}_3$ ) 4.02-4.18 (4H, m), 6.02 (1H, s), 6.36-6.38 (1H, m), 6.47-6.50 (1H, m), 6.54-6.56 (1H, m), 6.63-6.65 (1H, m), 7.38-7.42 (2H, m), 7.49-7.53 (1H, m), 7.62-7.65 (1H, m);  $\delta_{\text{C}}$  (75 MHz,  $\text{CDCl}_3$ ) 65.4, 102.1, 121.2, 126.3, 126.4, 128.7, 129.0, 131.6, 132.2, 135.1, 135.7 (s), 136.6 (s), 146.5 (s); HRMS (ESI)  $m/z$  calcd for  $\text{C}_{15}\text{H}_{13}\text{DO}_2$   $[\text{M}+\text{H}]^+$  228.1135; found: 228.1138.

### Procedure for the preparation of the benz[*f*]indenes 18, 19, 21 and 22

A solution of the fulvene **14** or **20** (1 mmol) in dimethylsulfoxide (5 mL) was heated by microwave at 120 °C and at 120 W for 40 min. Then, the reaction mixture was poured into water (10 mL) and extracted with dichloromethane ( $3 \times 10$  mL). The organic layer was washed with water ( $3 \times 10$  mL) and dried over anhydrous  $\text{MgSO}_4$ . The solvent was evaporated and the resulting material was purified by column chromatography on silica gel.

**Benz[*f*]indenes 18 and 19:** eluent for column chromatography: hexanes/diethyl ether (7:3 v/v), (43%).

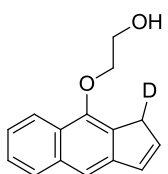

**9-(2-Hydroxy)ethoxybenz[*f*]indene-1-*d* (18):** white oil;  $\nu_{\max}$  (Neat)/ $\text{cm}^{-1}$  3383 (vs), 1579 (s), 1494 (m);  $\delta_{\text{H}}$  (400 MHz,  $\text{CDCl}_3$ ) 2.43 (1H, br s), 3.59-3.61 (1H, m), 4.06 (2H, t,  $J = 4.1$  Hz), 4.34 (2H, t,  $J = 4.1$  Hz), 6.61 (1H, dd,  $J = 2.4, 5.6$  Hz), 6.96 (1H, dd,  $J = 2.4, 5.6$  Hz), 7.45-7.48 (2H, m), 7.59 (1H, s), 7.84-7.87 (1H, m), 8.19-8.22 (1H, m);  $\delta_{\text{C}}$  (75 MHz,  $\text{CDCl}_3$ ) 36.2 (t,  $J_{\text{CD}} = 19.7$  Hz), 62.5, 73.9, 115.1, 121.8, 124.9, 125.7, 126.2 (s), 128.1, 128.6 (s), 132.3, 134.9 (s), 135.3, 145.3 (s), 149.5 (s); HRMS (ESI)  $m/z$  calcd for  $\text{C}_{15}\text{H}_{14}\text{DO}_2$   $[\text{M}+\text{H}]^+$  228.1135; found: 228.1140.

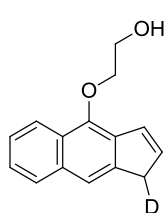

**4-(2-Hydroxy)ethoxybenz[f]indene-1-d (19):** white oil;  $\nu_{\max}$  (Neat)/ $\text{cm}^{-1}$  3384 (vs), 1579 (m), 1499 (m);  $\delta_{\text{H}}$  (400 MHz,  $\text{CDCl}_3$ ) 2.36-2.38 (1H, m), 3.50-3.57 (1H, m), 4.04-4.08 (2H, m), 4.29-4.31 (2H, m), 6.59 (1H, dd,  $J = 2.0, 5.6$  Hz), 7.18 (1H, dd,  $J = 2.0, 5.6$  Hz), 7.42-7.50 (2H, m), 7.68 (1H, s), 7.83-7.85 (1H, m), 8.21-8.23 (1H, m);  $\delta_{\text{C}}$  (100 MHz,  $\text{CDCl}_3$ ) 38.4 (t,  $J_{\text{CD}} = 19.6$  Hz), 62.6, 75.8, 118.6, 121.9, 125.2, 125.4, 127.1 (s), 128.0, 128.6, 133.3 (s), 133.4 (s), 135.0, 143.0 (s), 146.6 (s); HRMS (ESI)  $m/z$  calcd for  $\text{C}_{15}\text{H}_{14}\text{DO}_2$   $[\text{M}+\text{H}]^+$  228.1135; found: 228.1139.

**Benz[f]indenes 21 and 22:** eluent for column chromatography: hexanes/diethyl ether (7:3 v/v), (43%).

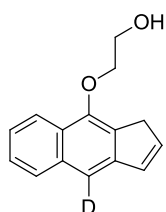

**9-(2-Hydroxy)ethoxybenz[f]indene-4-d (21):** white oil;  $\nu_{\max}$  (Neat)/ $\text{cm}^{-1}$  3384 (vs), 1578 (m), 1418 (vs);  $\delta_{\text{H}}$  (400 MHz,  $\text{CDCl}_3$ ) 2.39 (1H, br s), 3.60 (2H, t,  $J = 2.0$  Hz), 4.05 (2H, t,  $J = 4.0$  Hz), 4.32 (2H, t,  $J = 4.0$  Hz), 6.61 (1H, dt,  $J = 2.0, 5.6$  Hz), 6.95 (1H, dt,  $J = 2.0, 5.6$  Hz), 7.43-7.48 (2H, m), 7.84-7.87 (1H, m), 8.19-8.22 (1H, m);  $\delta_{\text{C}}$  (100 MHz,  $\text{CDCl}_3$ ) 36.5, 62.5, 114.8 (t,  $J_{\text{CD}} = 24.2$  Hz), 121.8, 124.9, 125.7, 126.1 (s), 128.0, 128.7 (s), 132.1, 134.8 (s), 135.3, 145.1 (s), 149.4 (s); HRMS (ESI)  $m/z$  calcd for  $\text{C}_{15}\text{H}_{14}\text{DO}_2$   $[\text{M}+\text{H}]^+$  228.1135; found: 228.1140.

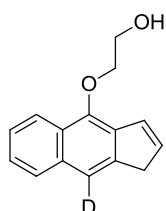

**4-(2-Hydroxy)ethoxybenz[f]indene-9-d (22):** white oil;  $\nu_{\max}$  (Neat)/ $\text{cm}^{-1}$  3384 (vs), 1580 (m), 1345 (vs);  $\delta_{\text{H}}$  (400 MHz,  $\text{CDCl}_3$ ) 2.28 (1H, br s), 3.57 (2H, t,  $J = 2.0$  Hz), 4.06 (2H, t,  $J = 4.8$  Hz), 4.30 (2H, t,  $J = 4.8$  Hz), 6.59 (1H, dt,  $J = 2.4, 5.6$  Hz), 7.18 (1H, dt,  $J = 2.4, 5.6$  Hz), 7.42-7.50 (2H, m), 7.83-7.85 (1H, m), 8.21-8.24 (1H, m);  $\delta_{\text{C}}$  (100 MHz,  $\text{CDCl}_3$ ) 38.6, 62.5, 75.8, 118.2 (t,  $J_{\text{CD}} = 24.1$  Hz), 121.8, 125.2, 125.3, 127.0 (s), 127.9, 128.5, 133.2 (s), 133.3 (s), 135.0, 142.9 (s), 146.6 (s); HRMS (ESI)  $m/z$  calcd for  $\text{C}_{15}\text{H}_{14}\text{DO}_2$   $[\text{M}+\text{H}]^+$  228.1135; found: 228.1139.

## References:

- [1] Hartman, G. D.; Phillips, B. T.; Halczenko, W. *J. Org. Chem.* **1985**, *50*, 2423-2427.
- [2] Remy, D. C.; King, S. W.; Cochran, D. *J. Org. Chem.* **1985**, *50*, 4120-4125.
- [3] Dumoulin, D.; Lebrun, S.; Deniau, E.; Couture, A.; Grandclaudeon, P. *Eur. J. Org. Chem.* **2009**, 3741-3752.
- [4] Moody, C.J.; Warrelow, G. J. *J. Chem. Soc., Perkin Trans. 1* **1990**, 2929-2936.

- [5] Meegalla, S. K.; Rodrigo, R. *J. Org. Chem.* **1991**, *56*, 1882-1888.
- [6] Friedrichsen, W.; Koenig, B. M.; Hildebrandt, K. *Heterocycles* **1986**, *24*, 297-302.
- [7] Rodrigo, R.; Knabe, S. M.; Taylor, N. J.; Rajapaksa, D.; Chernishenko, M. J. *J. Org. Chem.* **1986**, *51*, 3973-3978.
- [8] Sanchez-Larios, E.; Holmes, J. M.; Daschner, C. L.; Gravel, M. *Synthesis* **2011**, 1896-1904.
- [9] Alajarin, M.; Bonillo, B.; Marin-Luna, M.; Sanchez-Andrada, P.; Vidal, A. *Chem. Eur. J.* **2013**, *19*, 16093-16103.

<sup>1</sup>H NMR 5a

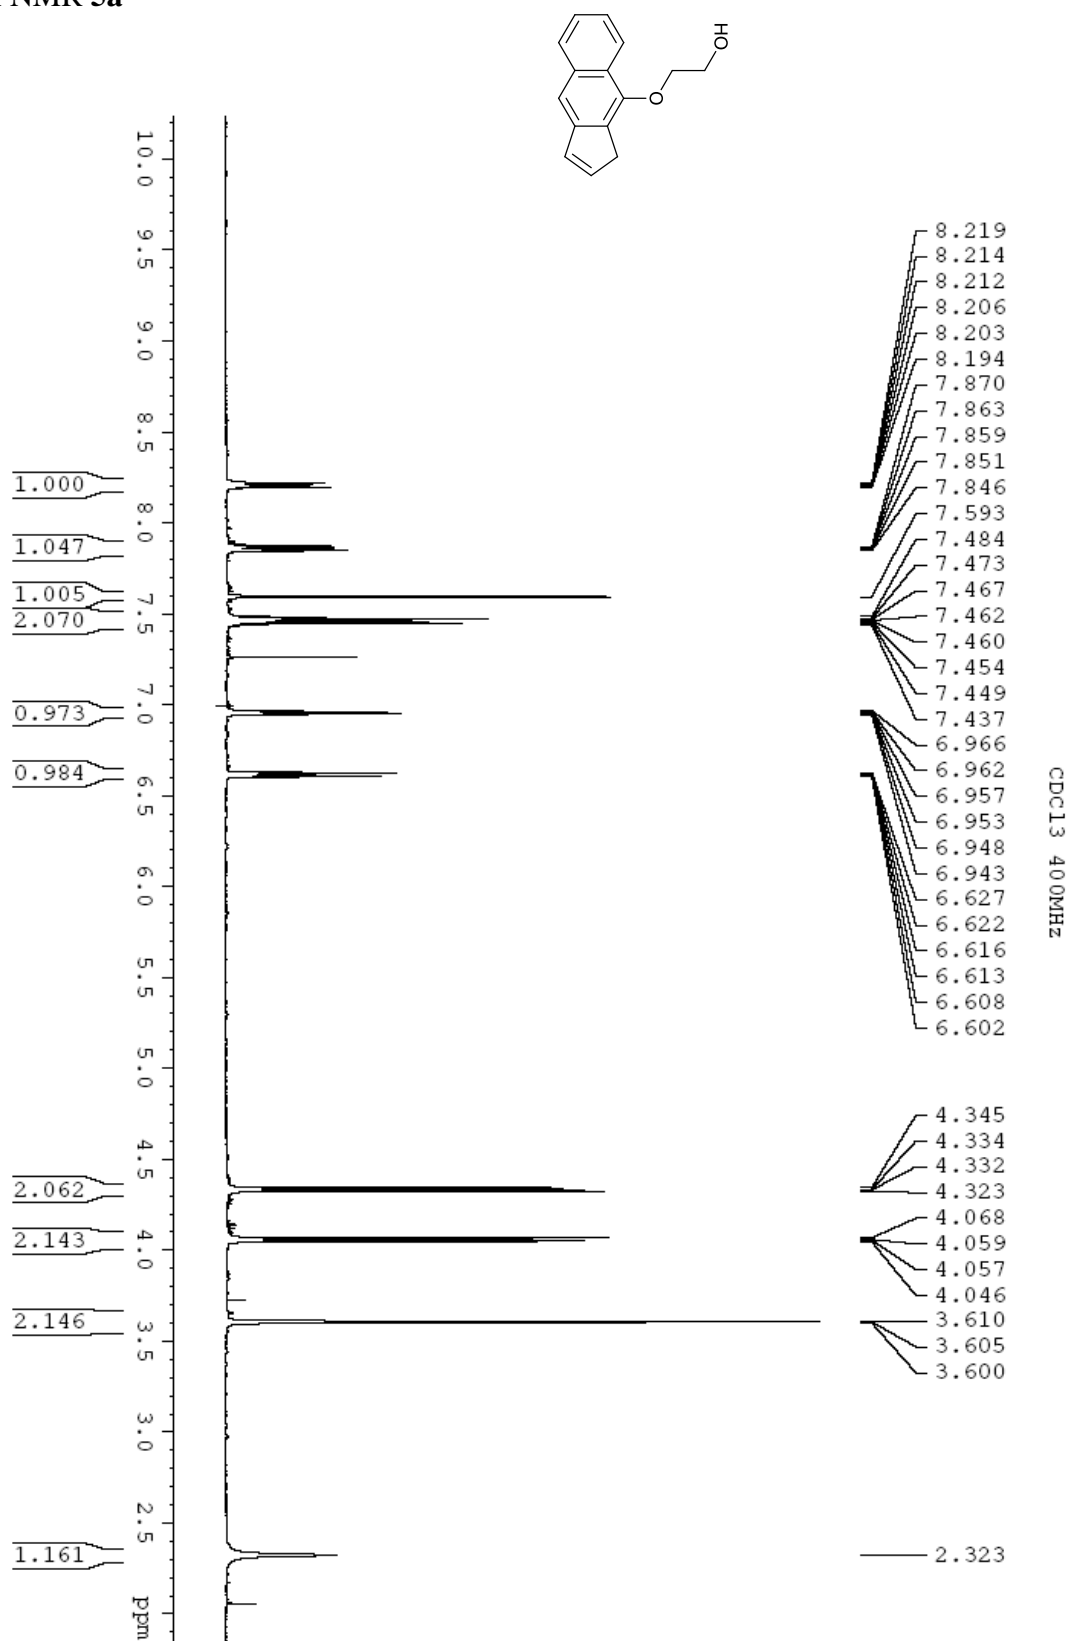

<sup>13</sup>C NMR **5a**

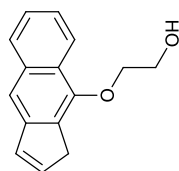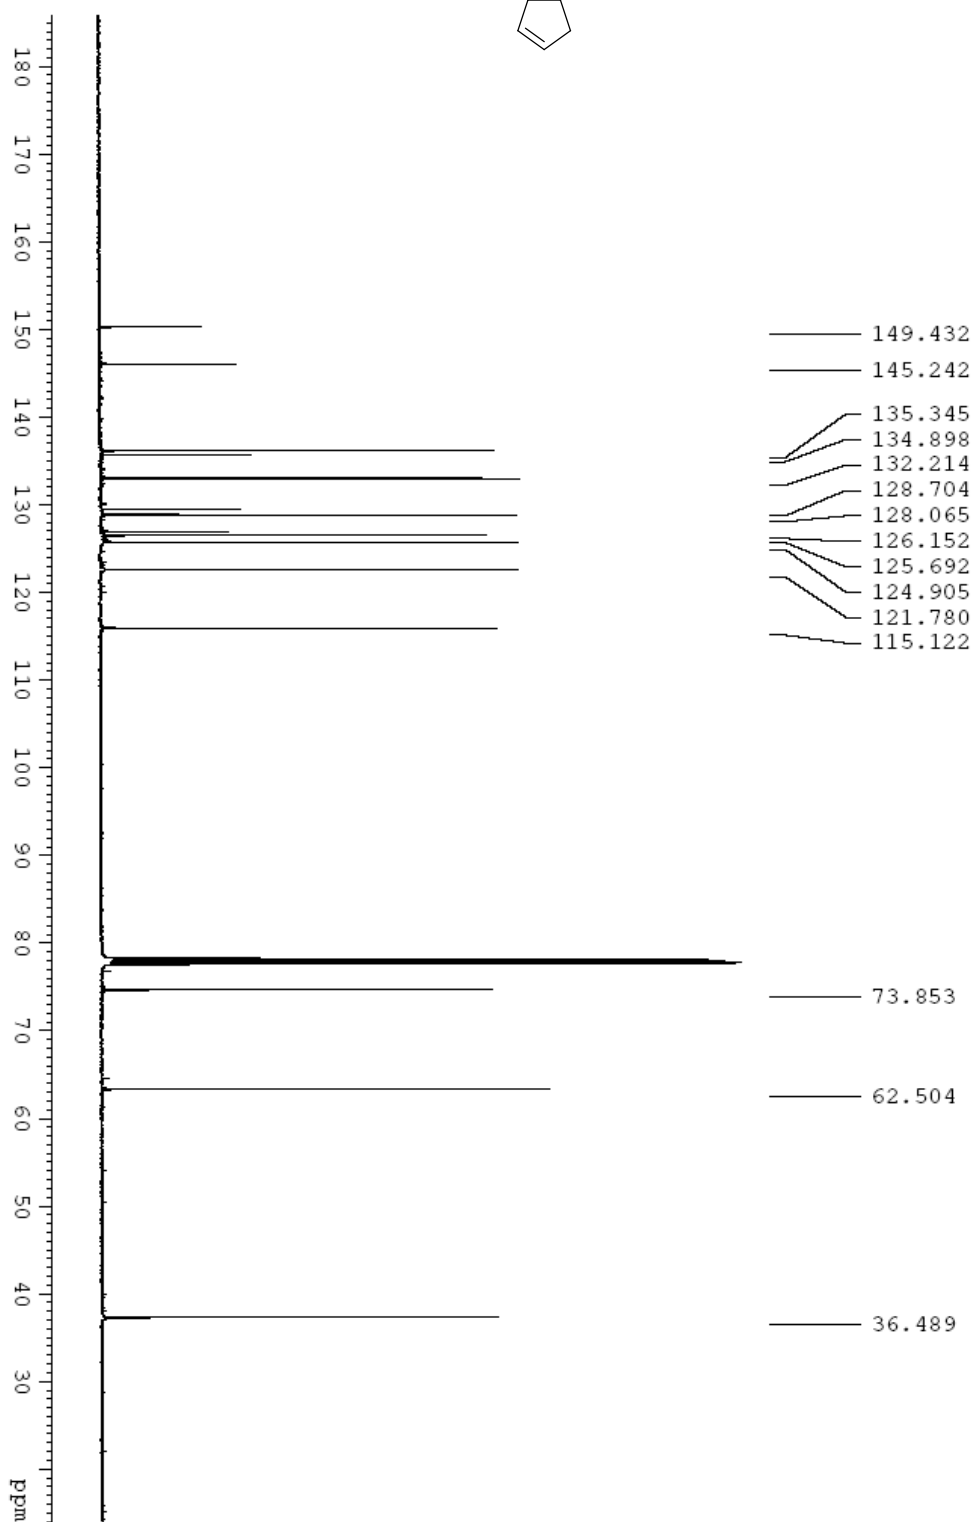

CDCl<sub>3</sub> 100MHz



<sup>1</sup>H NMR **6a**

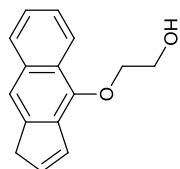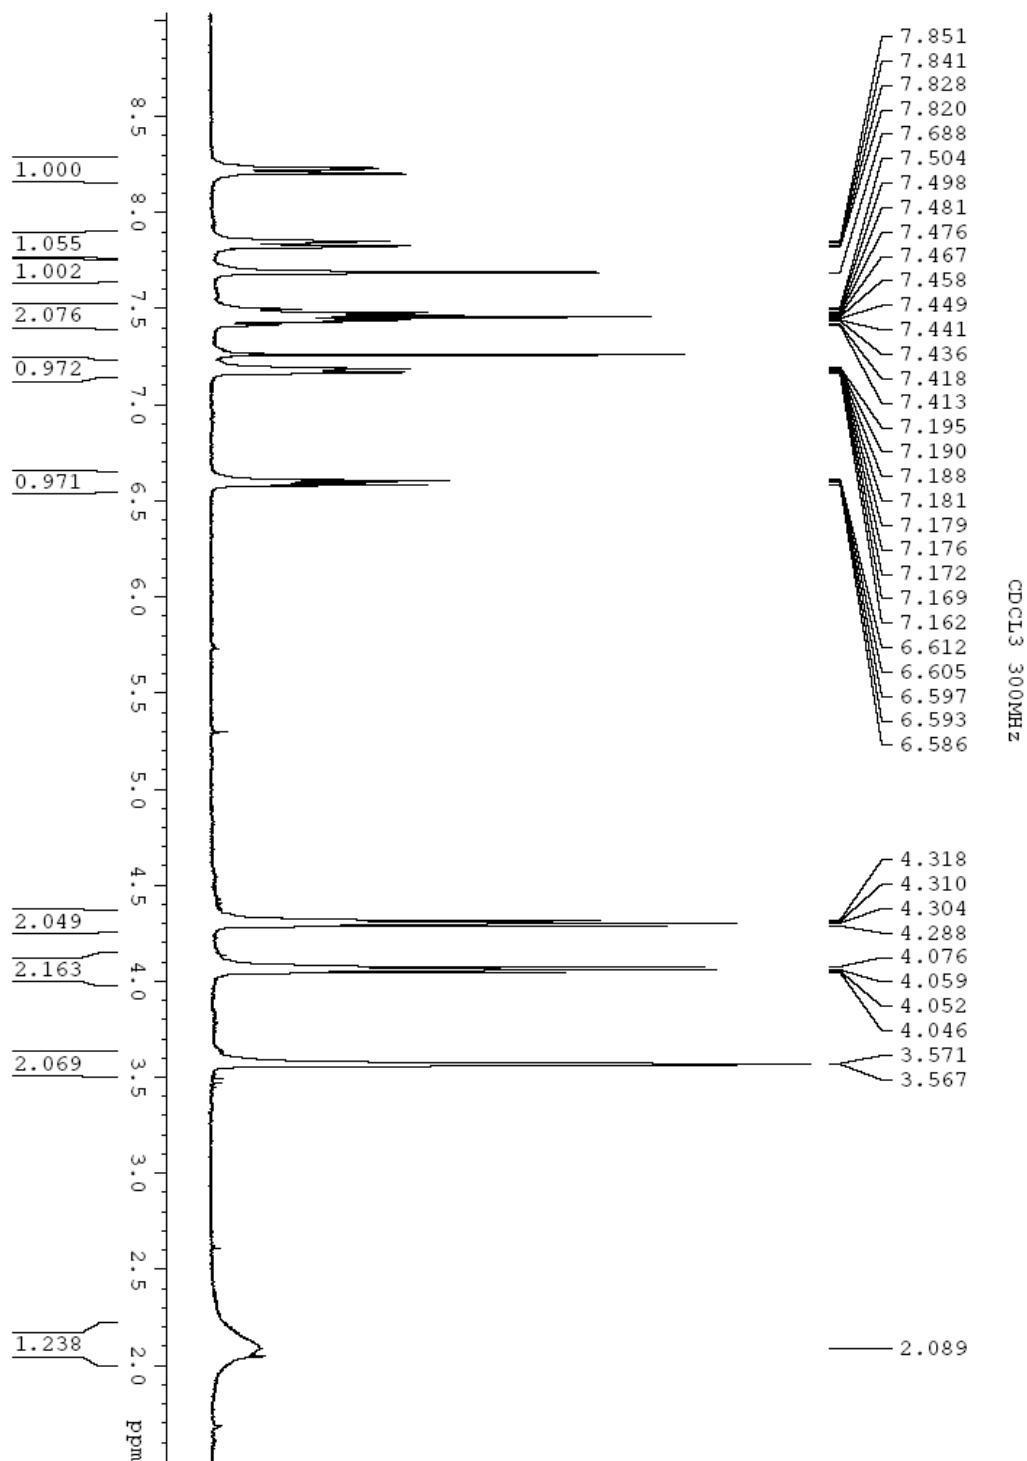

<sup>13</sup>C NMR 6a

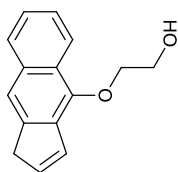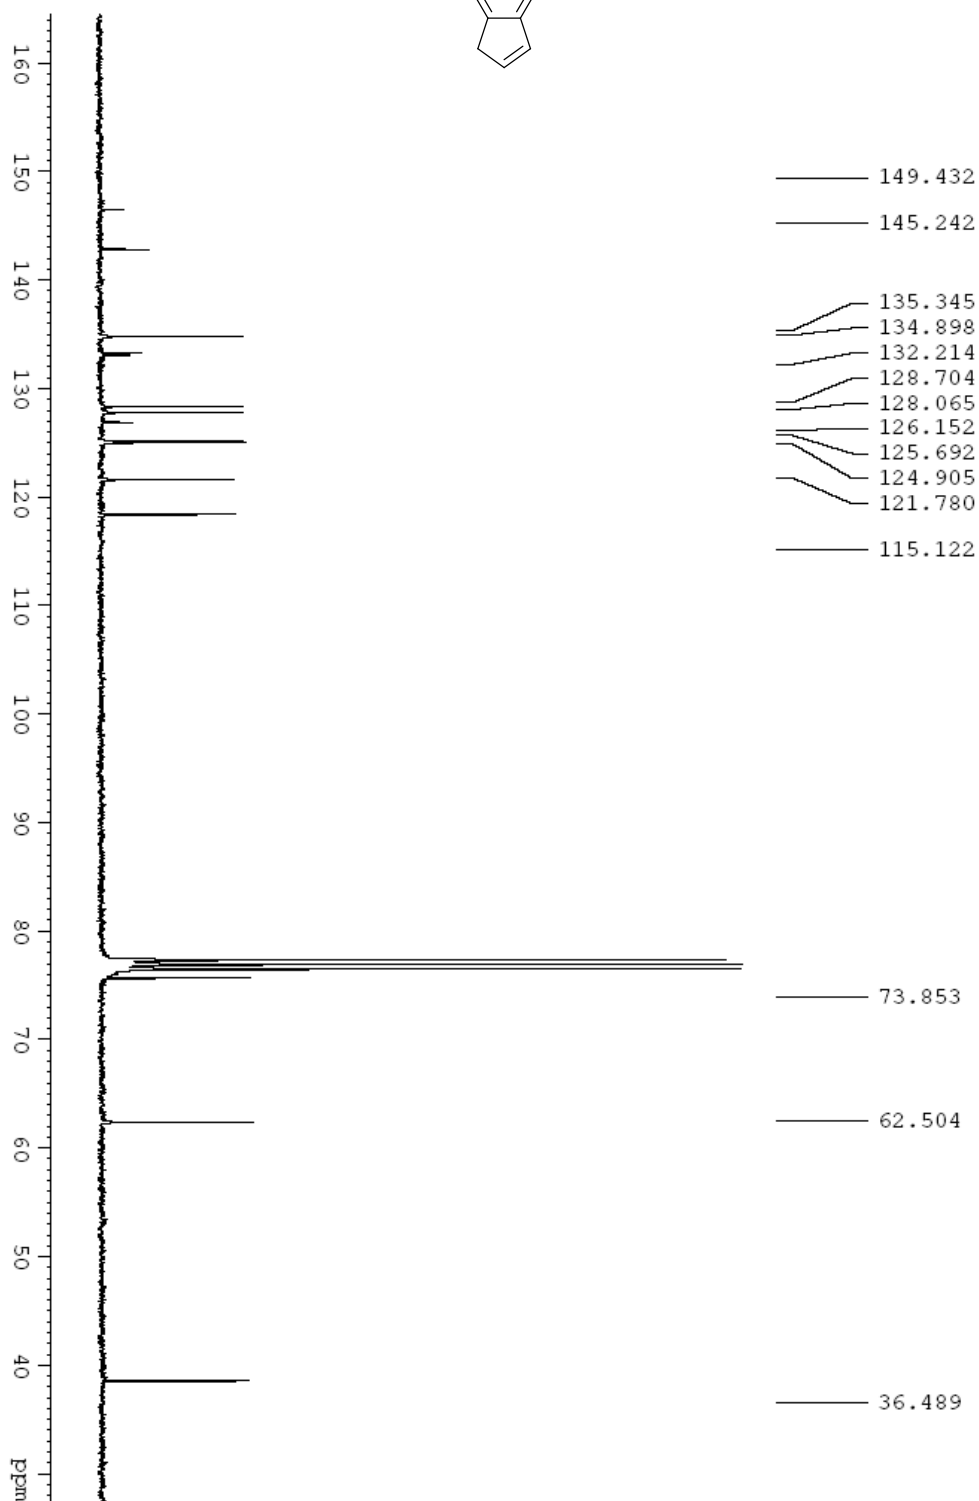

<sup>1</sup>H NMR **5b**

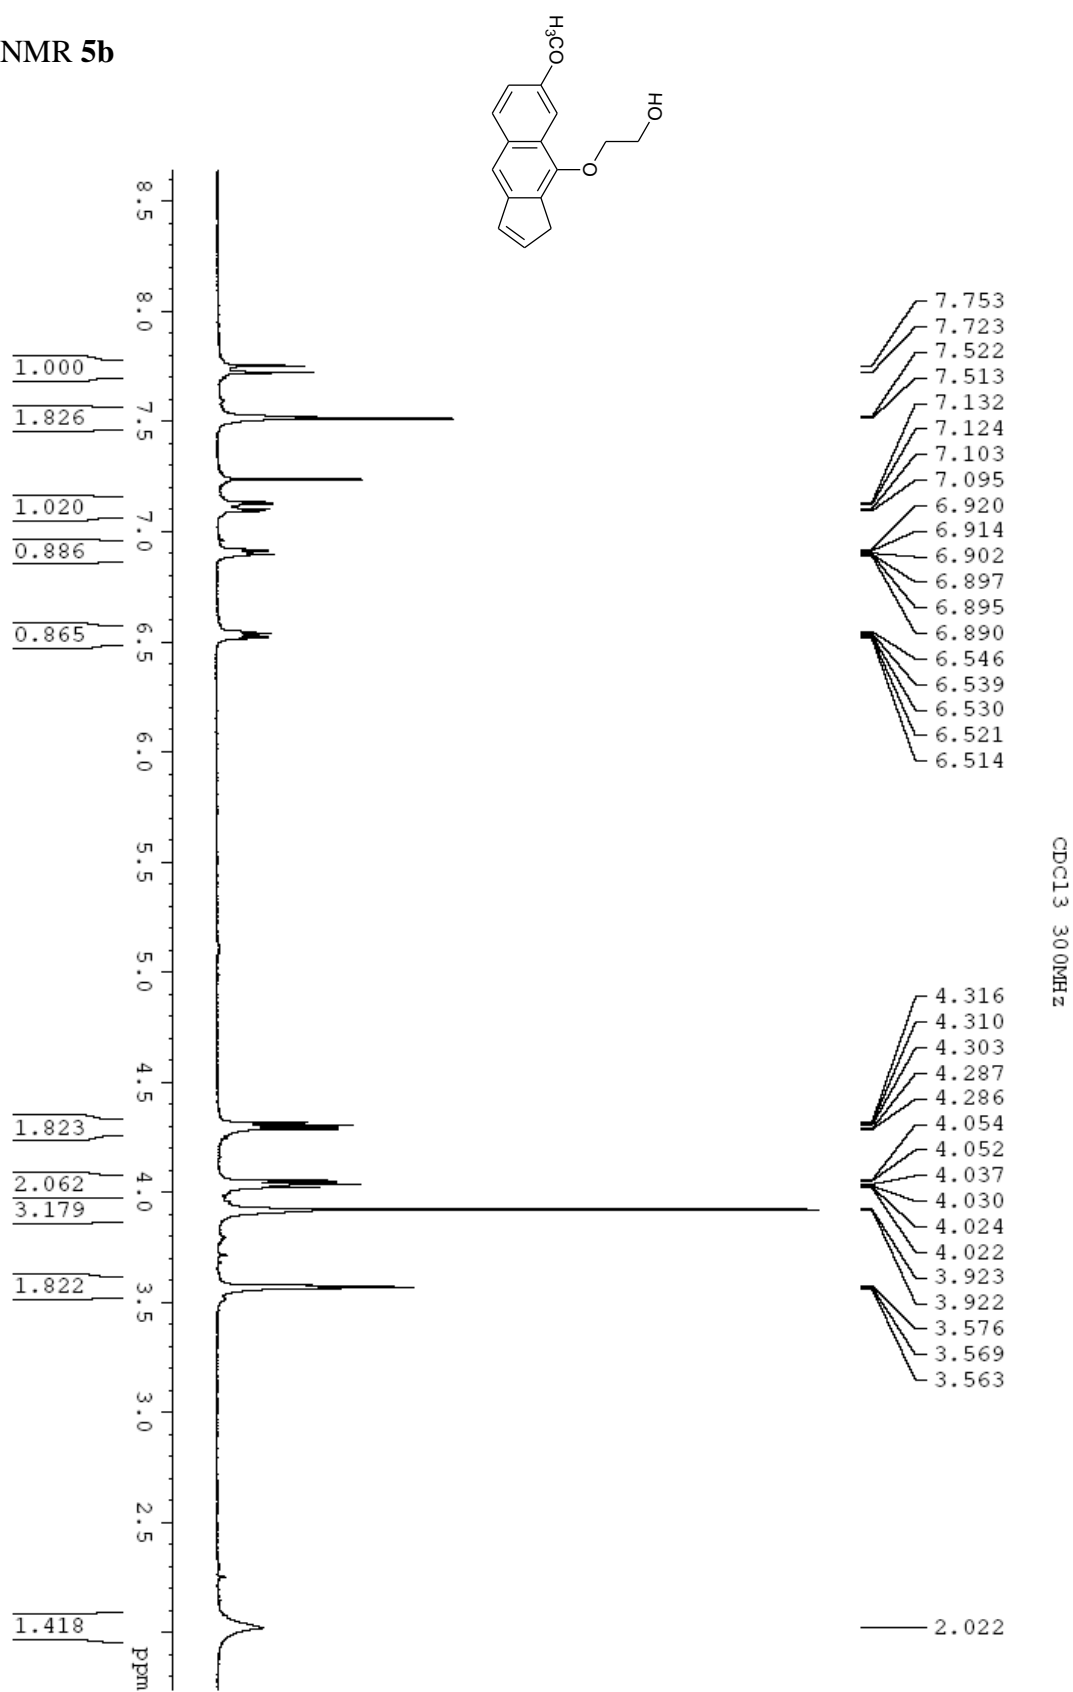

<sup>13</sup>C NMR **5b**

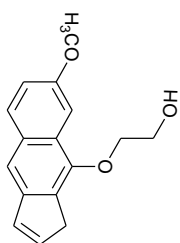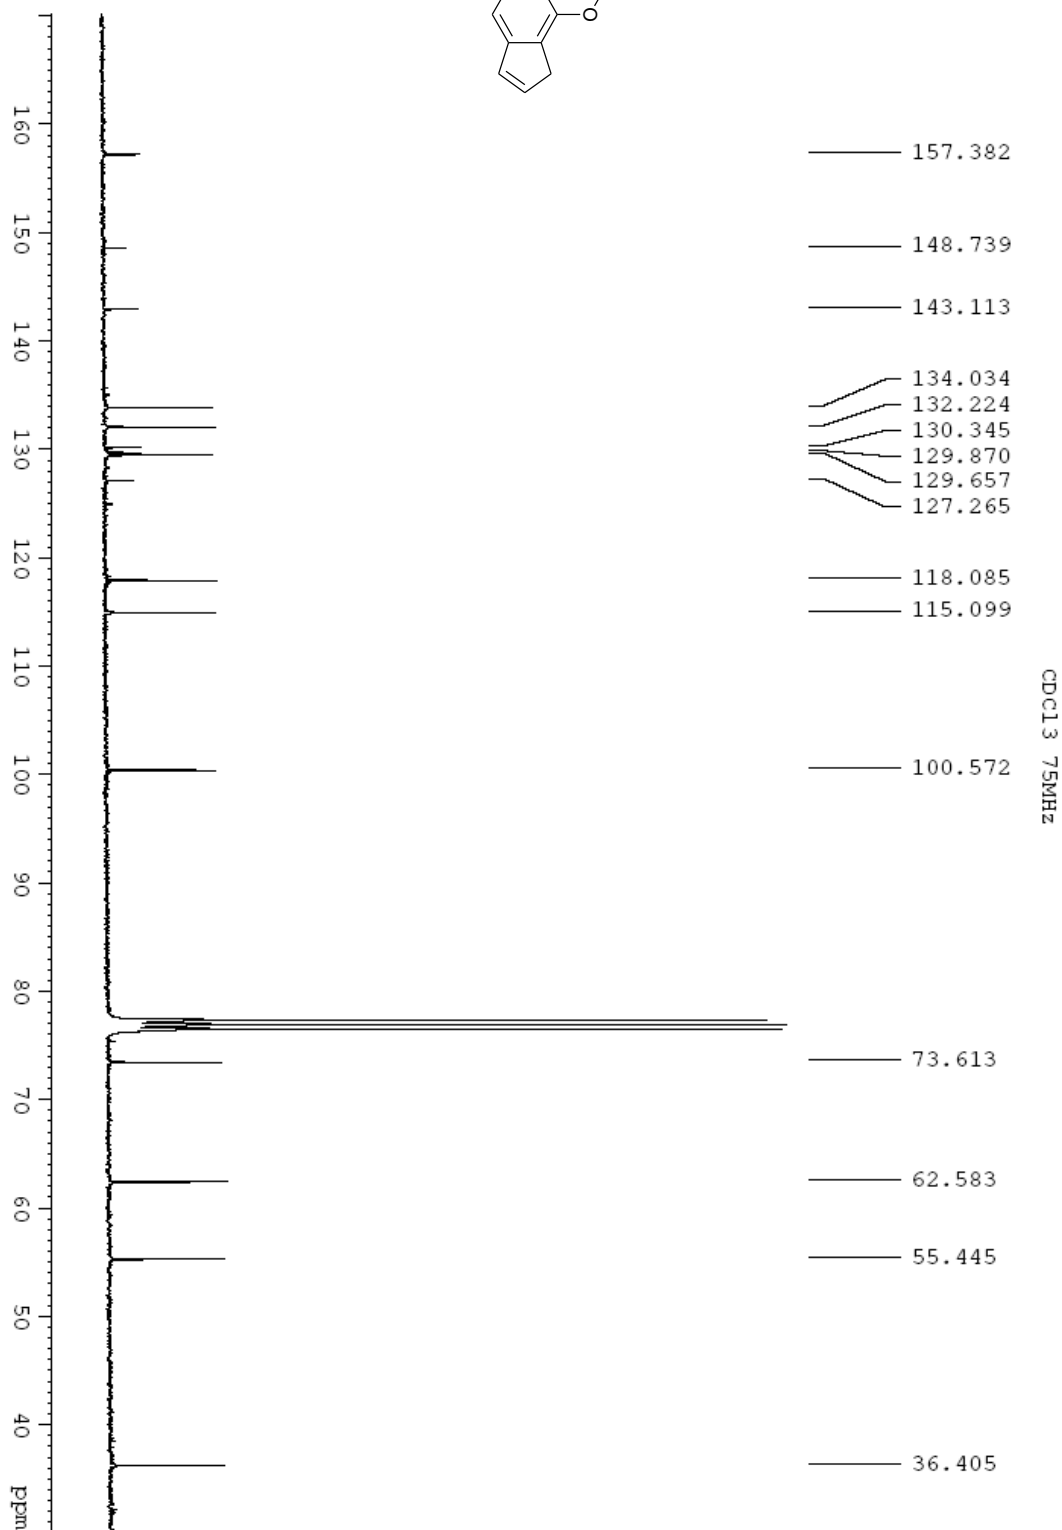

<sup>1</sup>H NMR **6b**

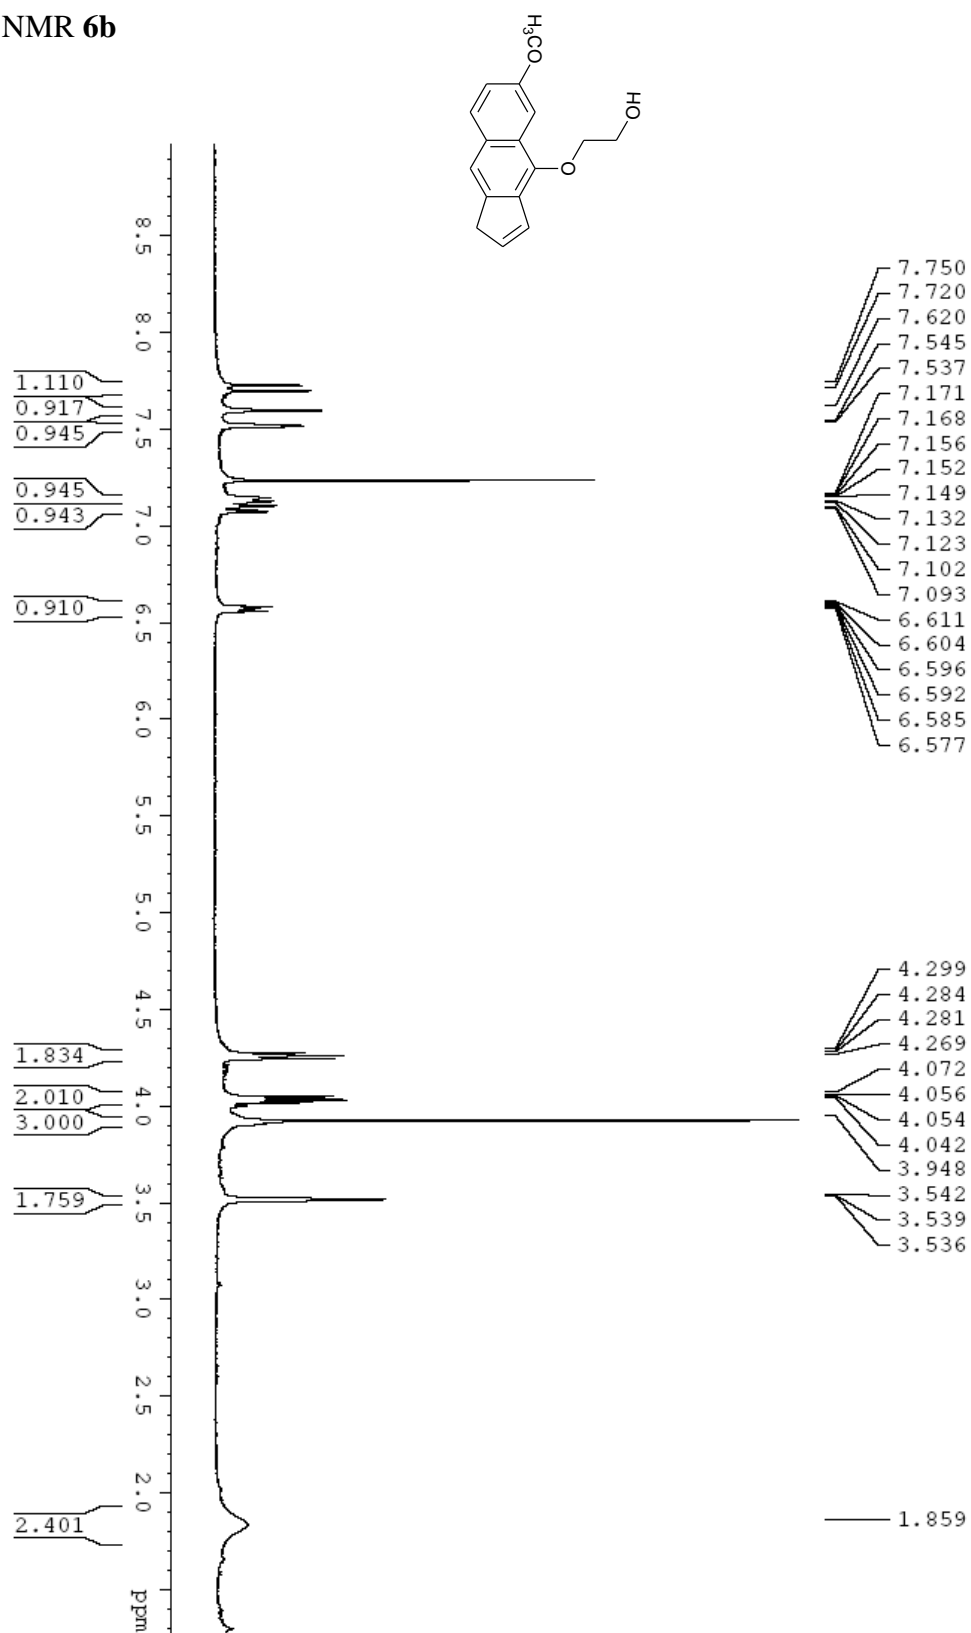

<sup>13</sup>C NMR **6b**

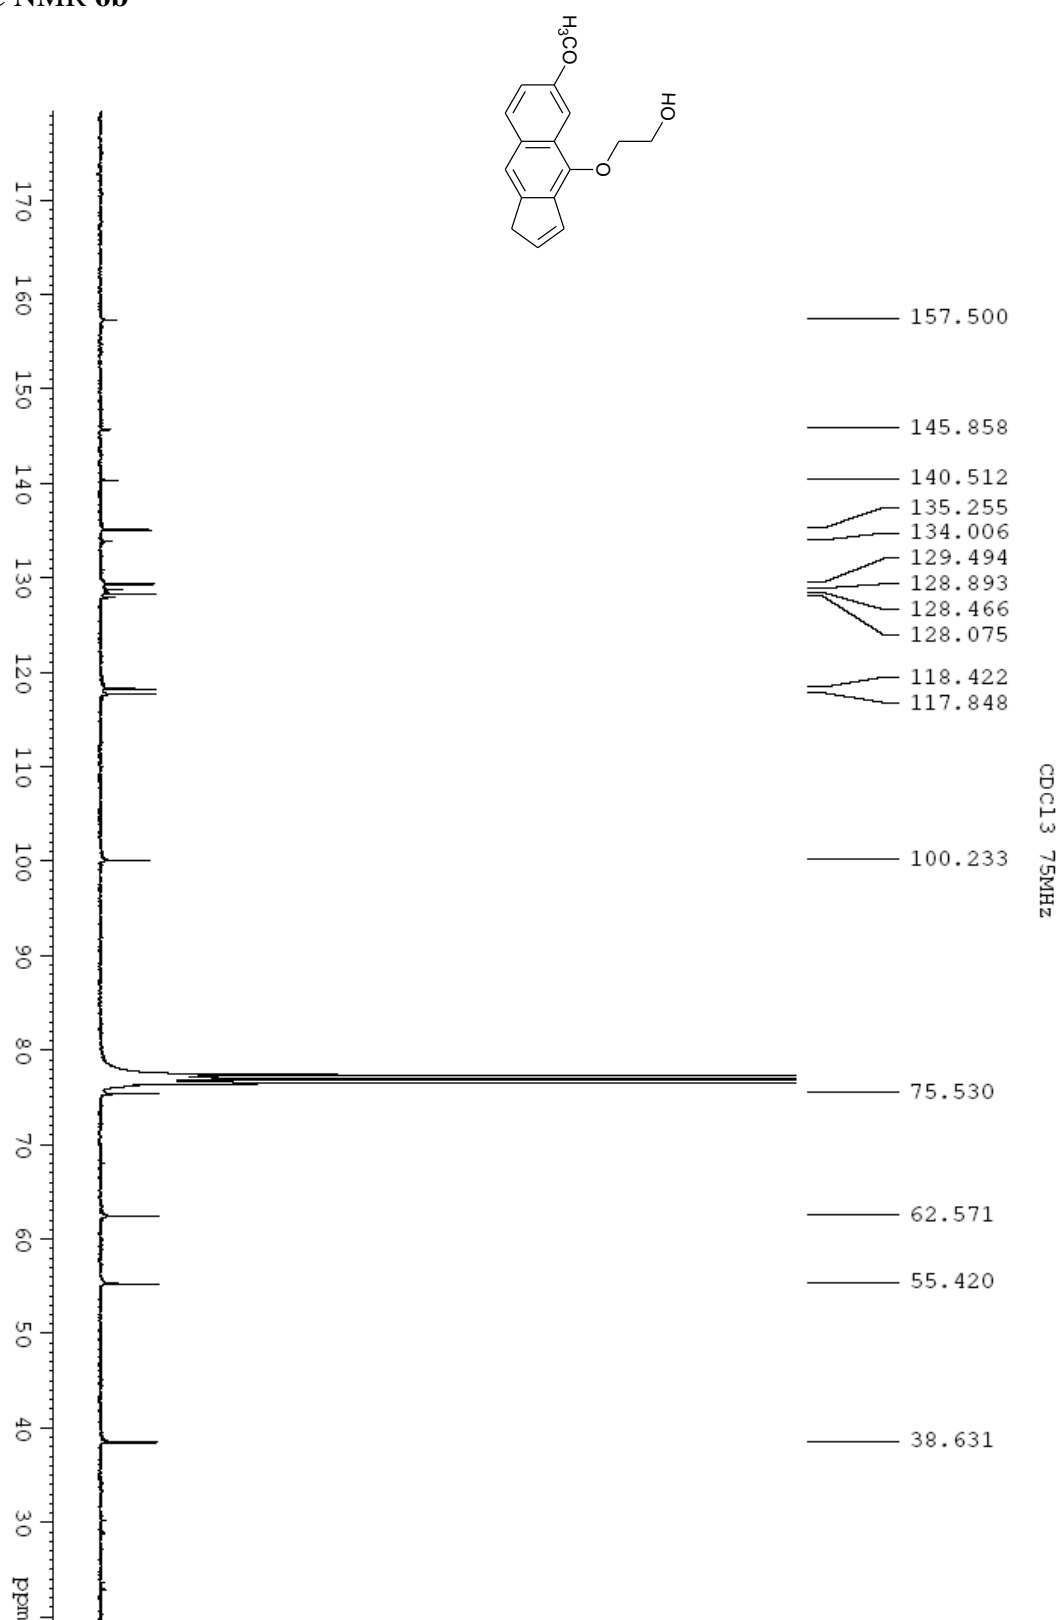

<sup>1</sup>H NMR 5c

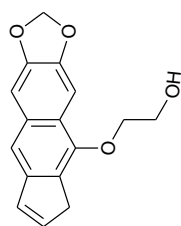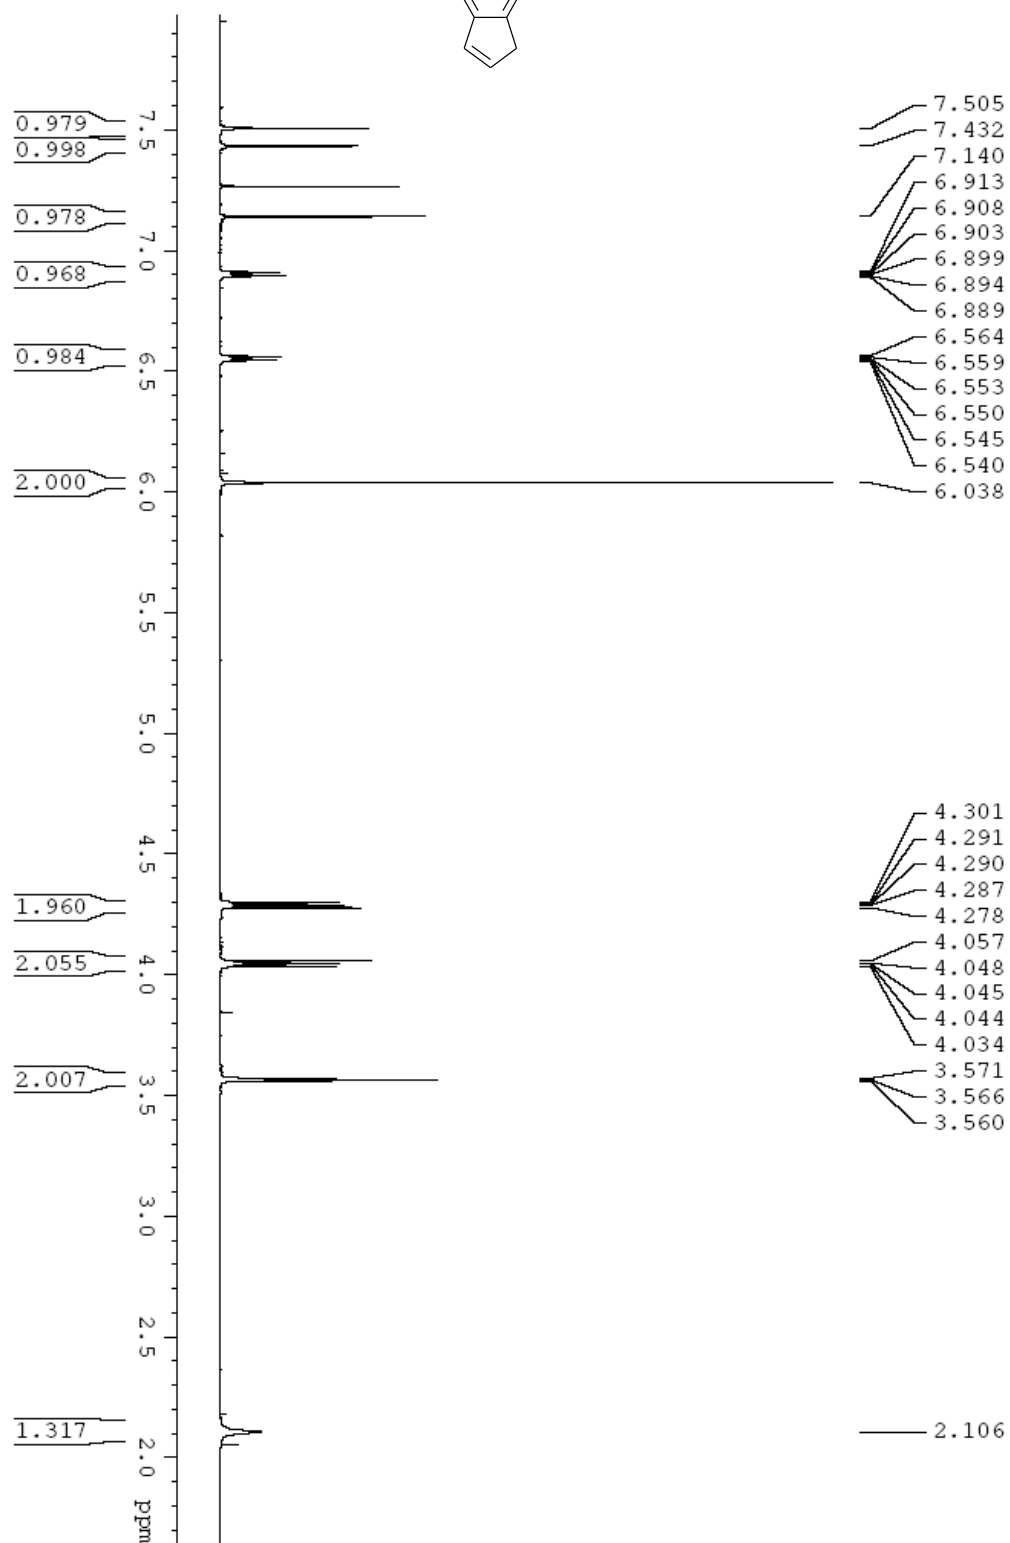

<sup>13</sup>C NMR **5c**

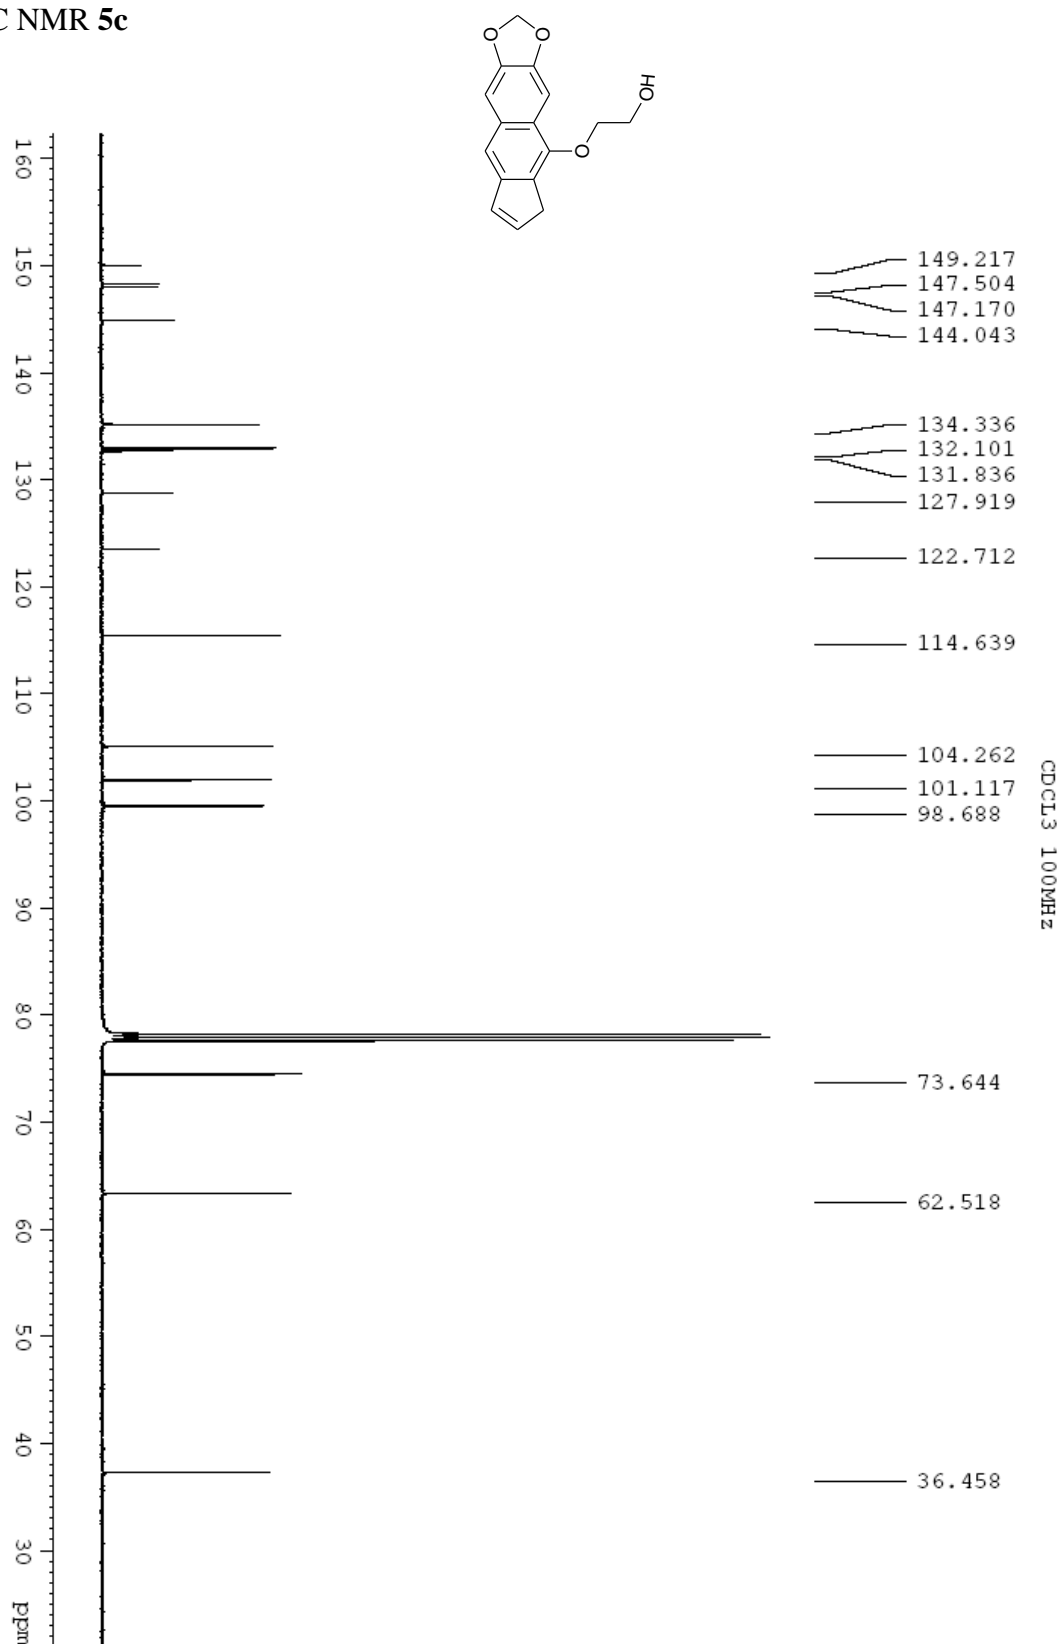



<sup>1</sup>H NMR 6c

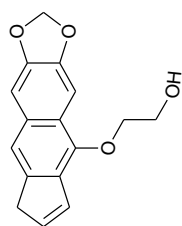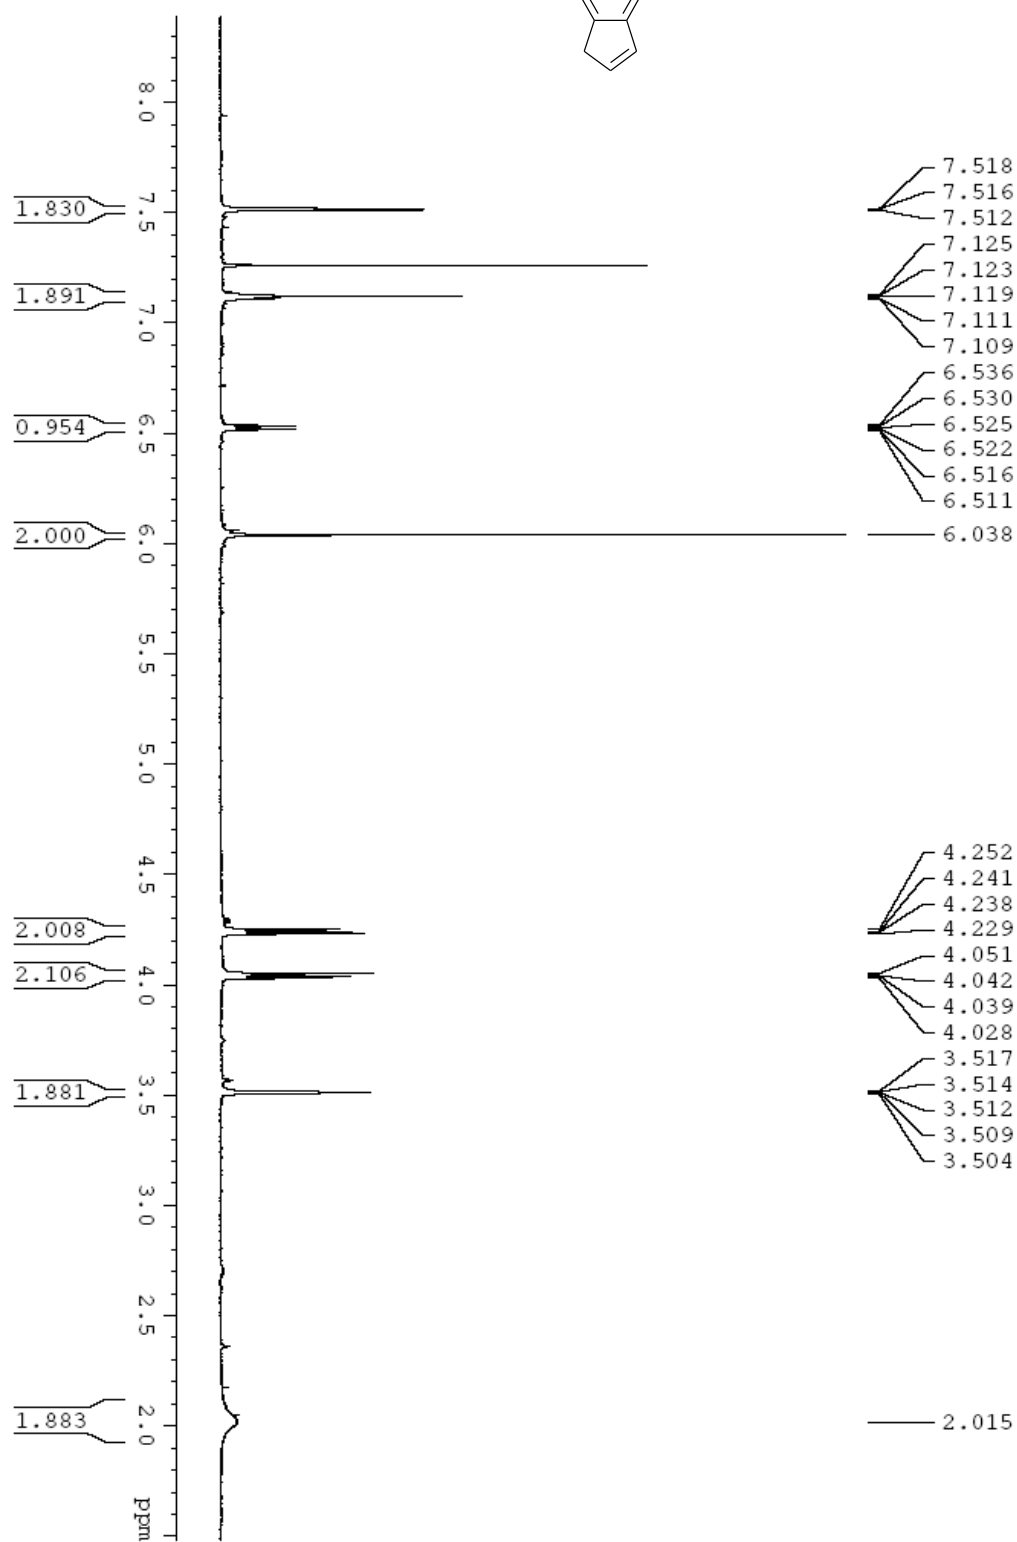

<sup>13</sup>C NMR **6c**

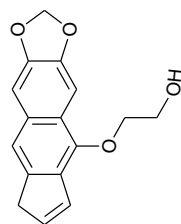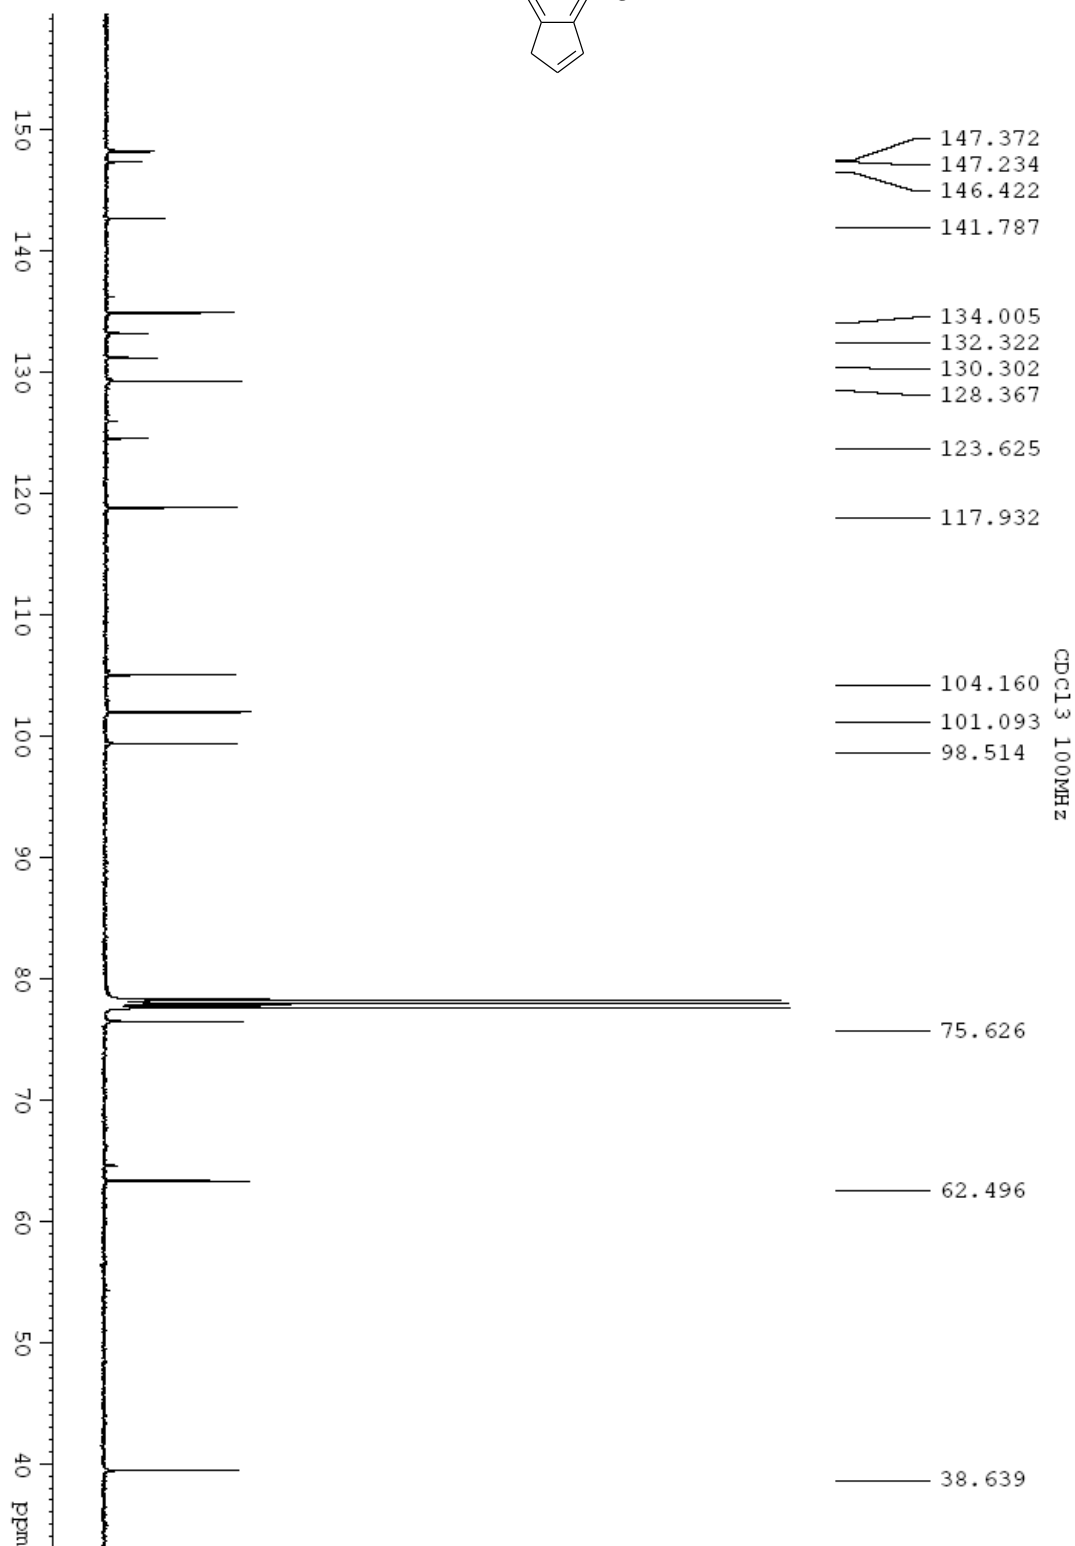

<sup>1</sup>H NMR 5d

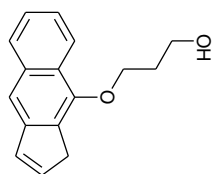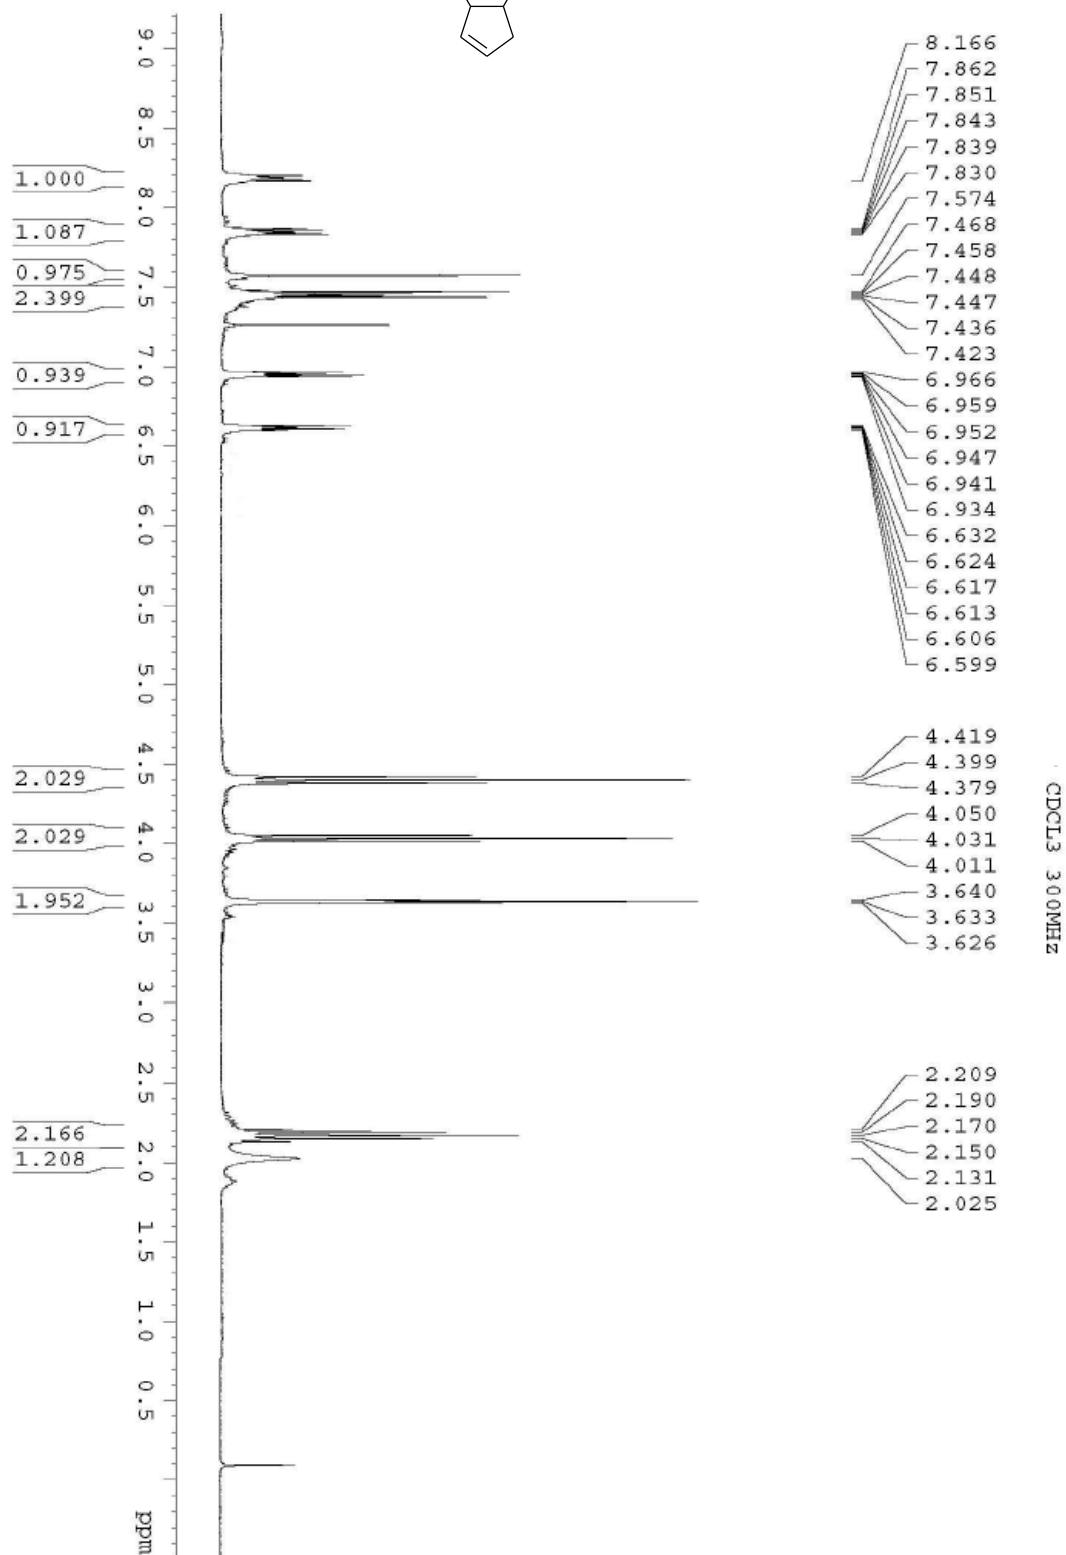

<sup>13</sup>C NMR 5d

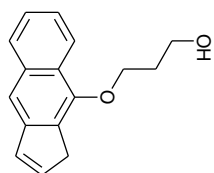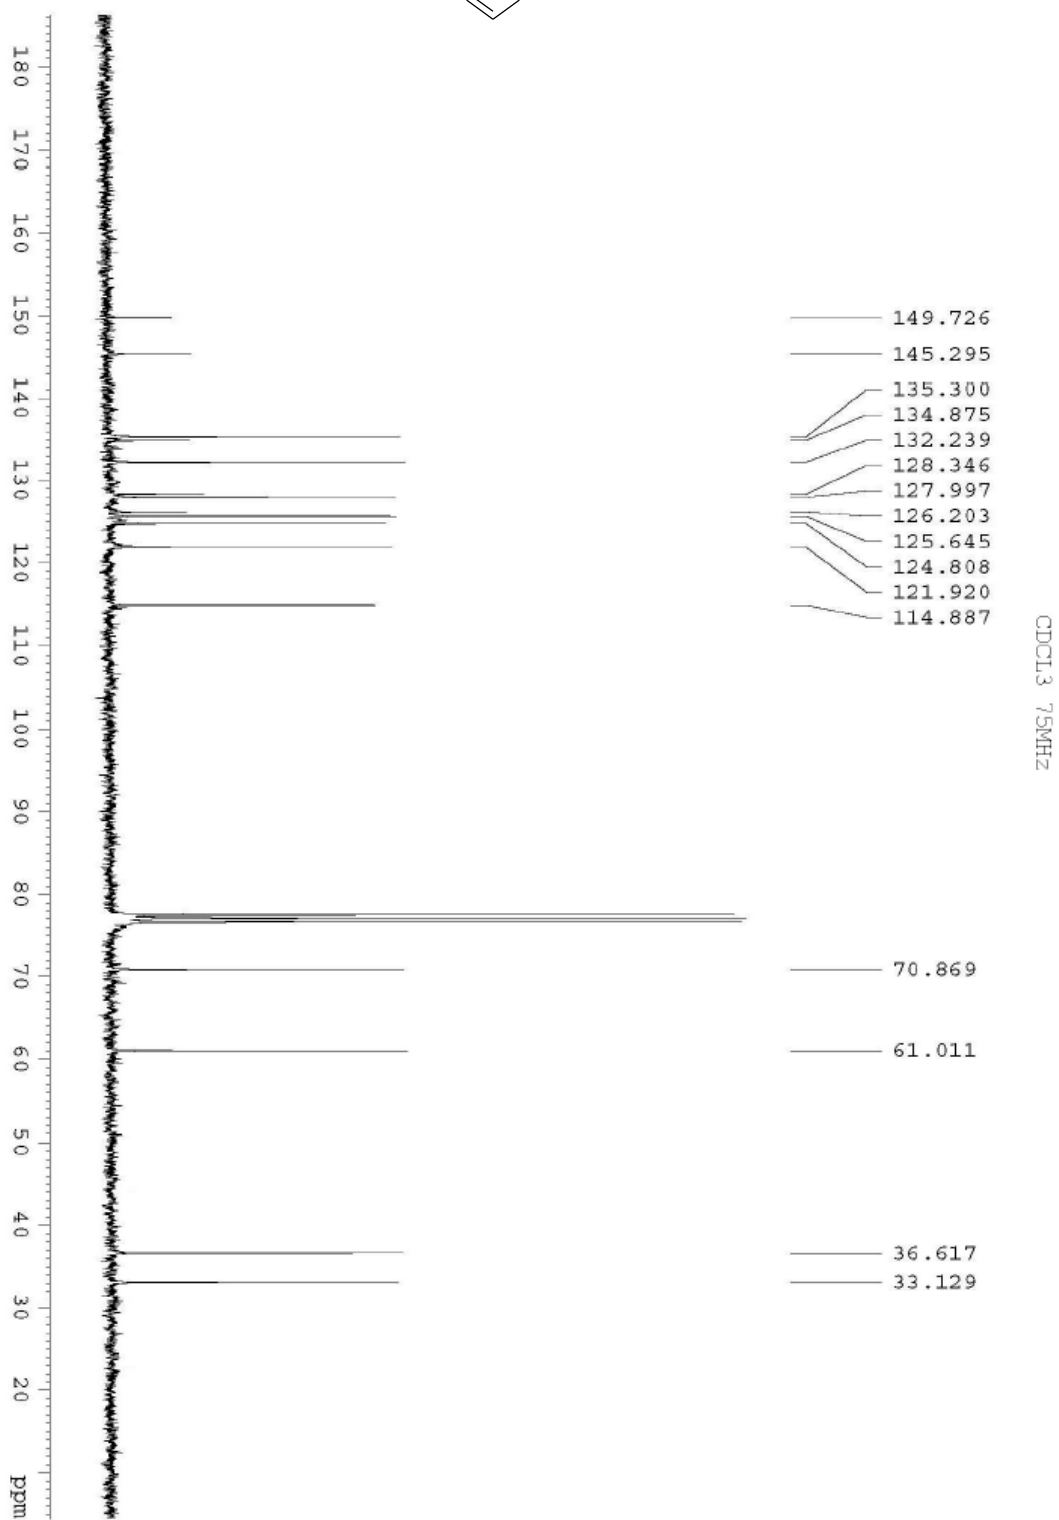

<sup>1</sup>H NMR **6d**

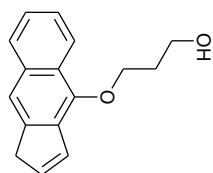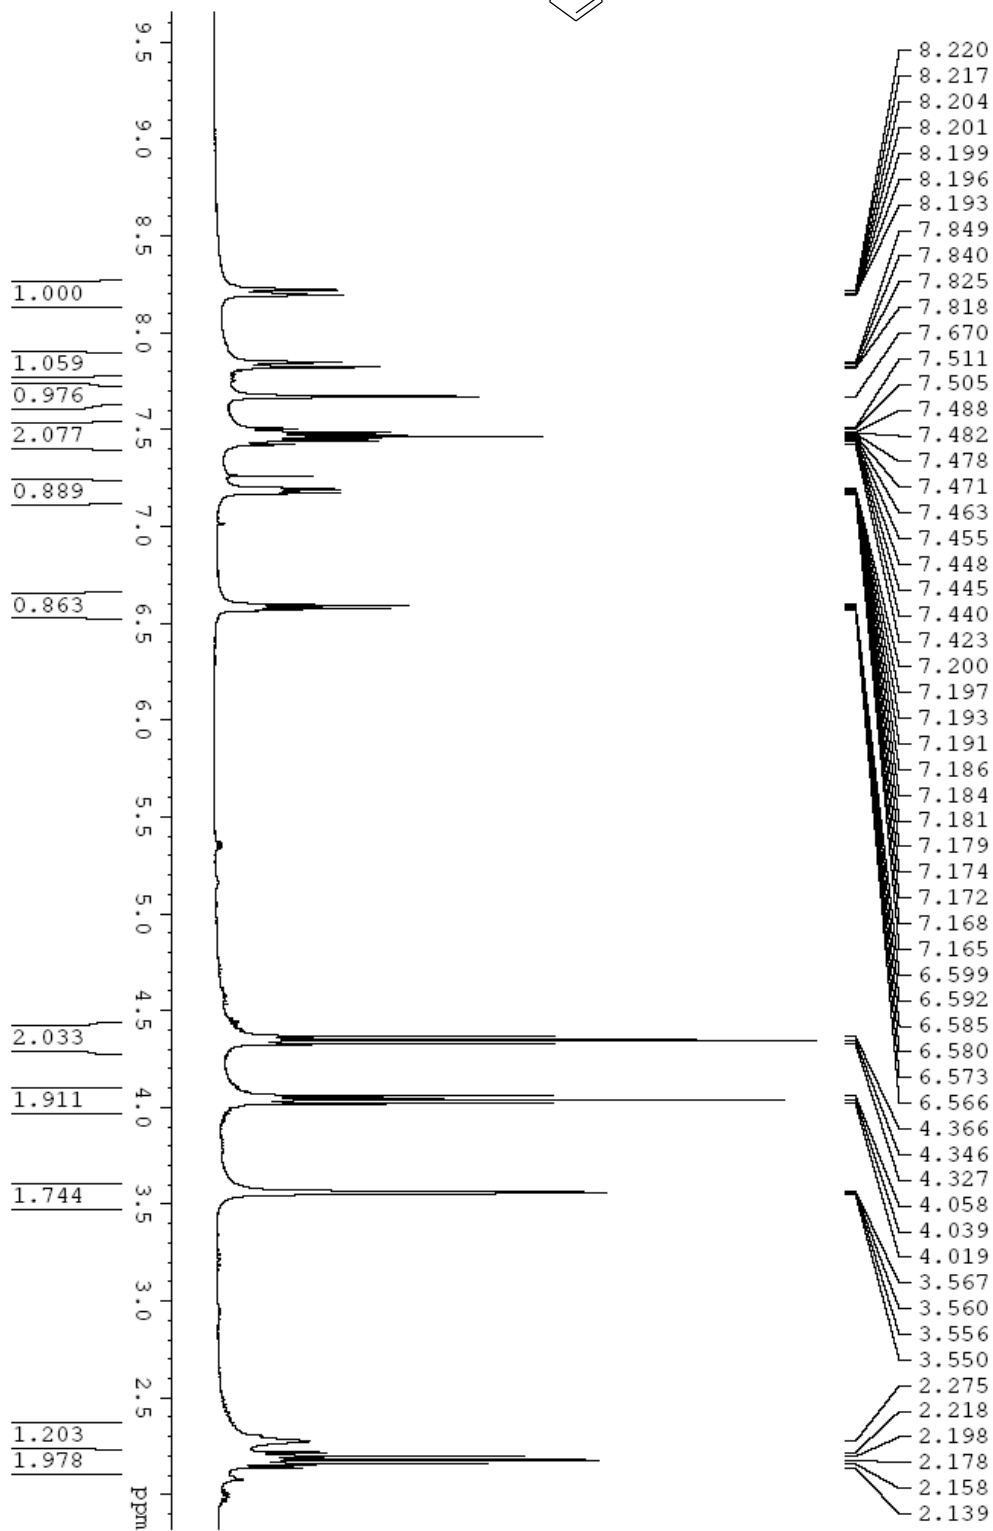

<sup>13</sup>C NMR 6d

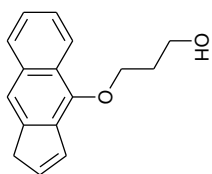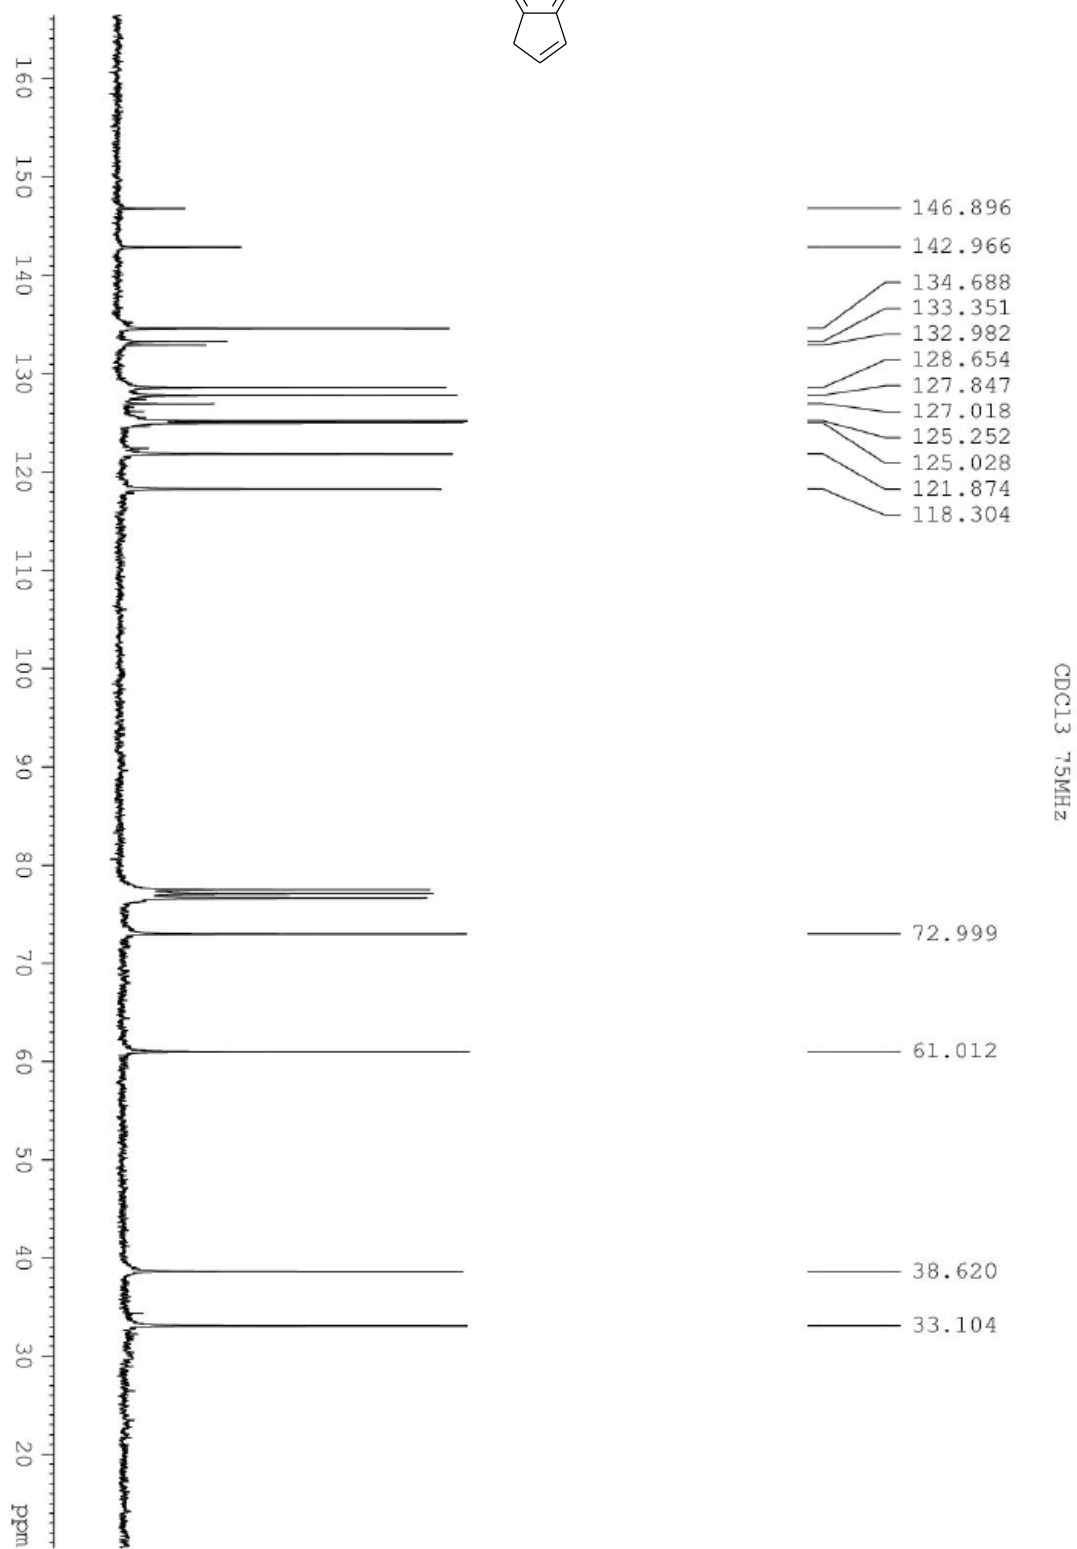

$^1\text{H}$  NMR **5e** + **6e**

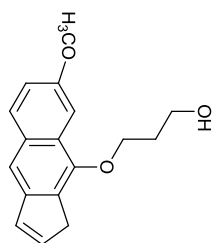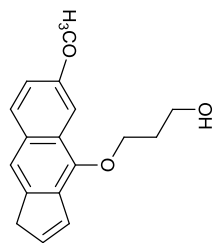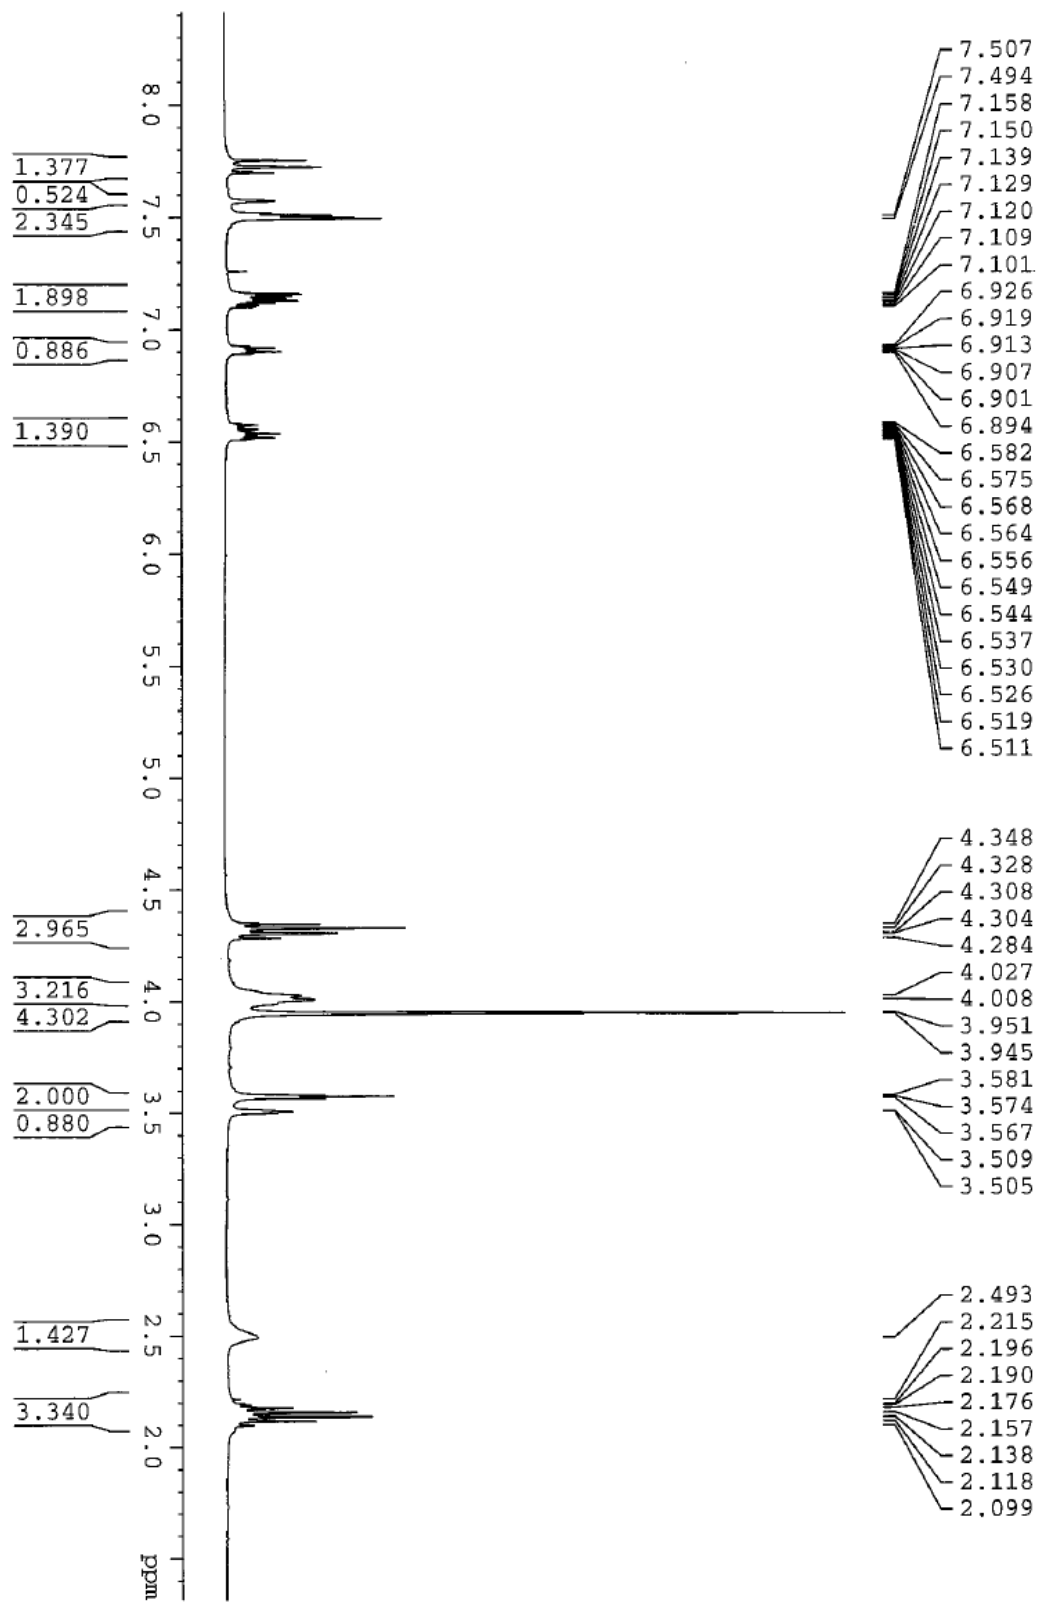

$^{13}\text{C}$  NMR 5e + 6e

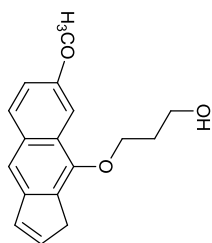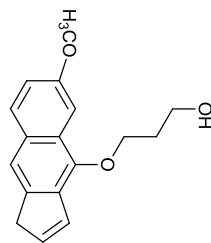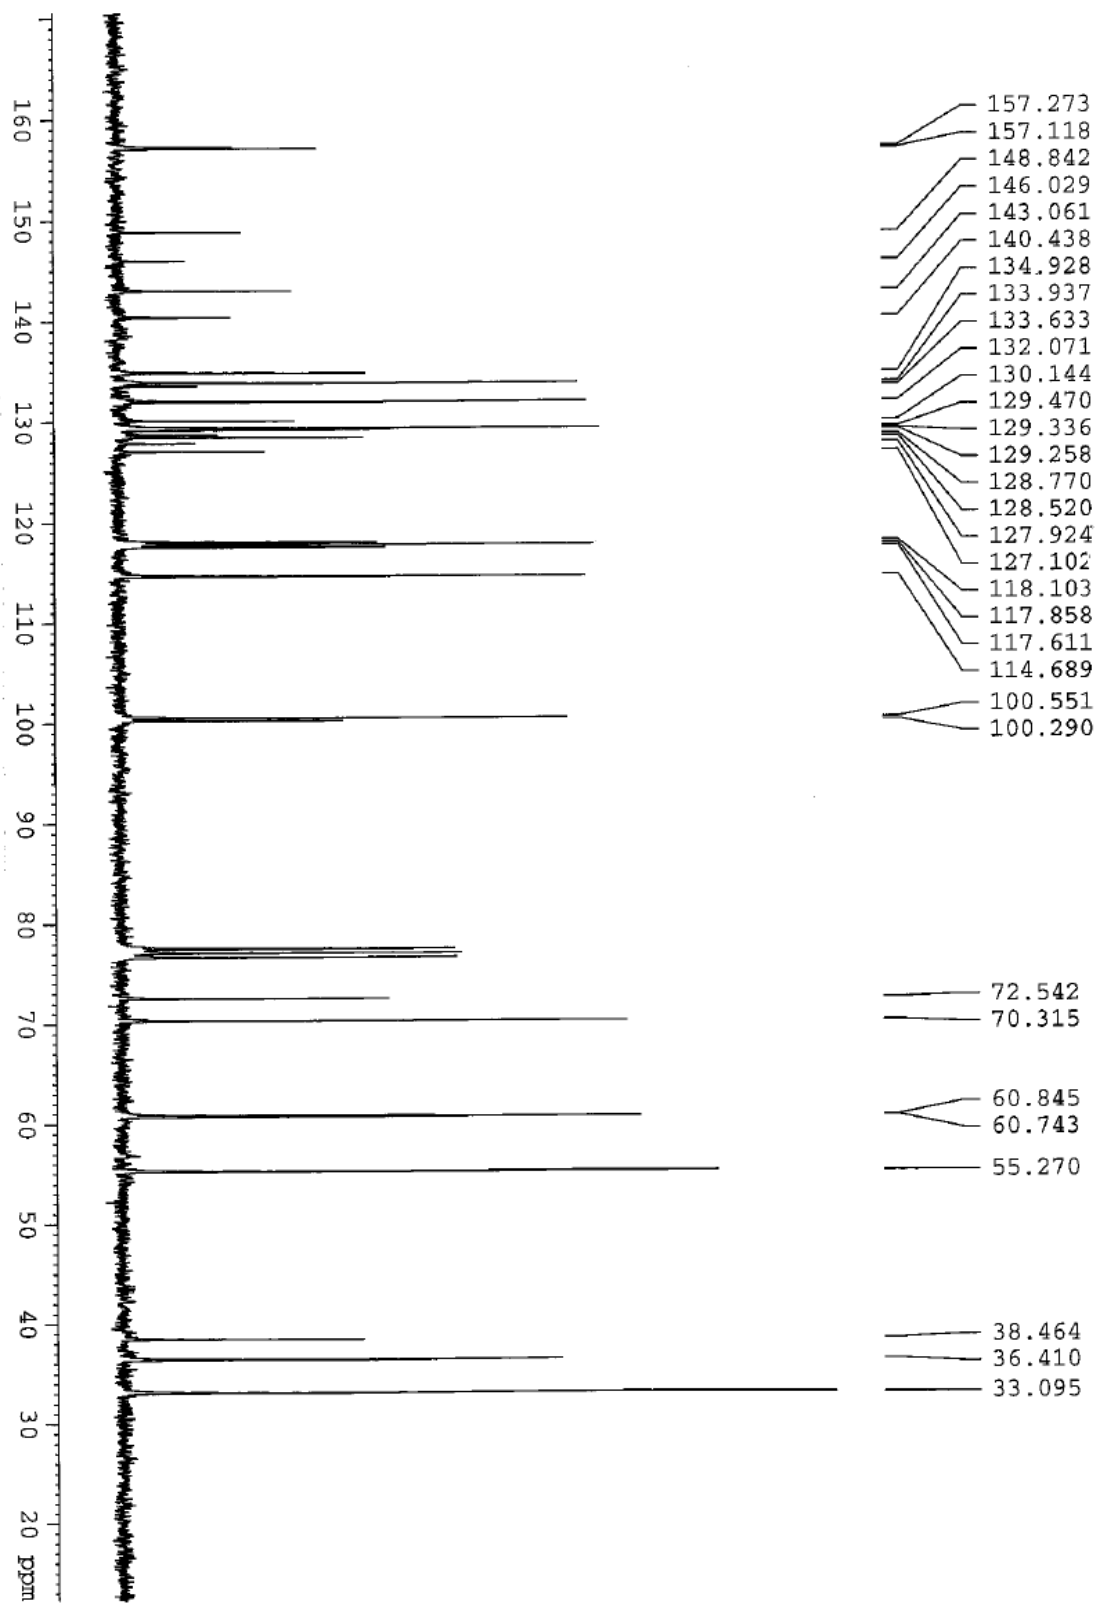



<sup>1</sup>H NMR 5f

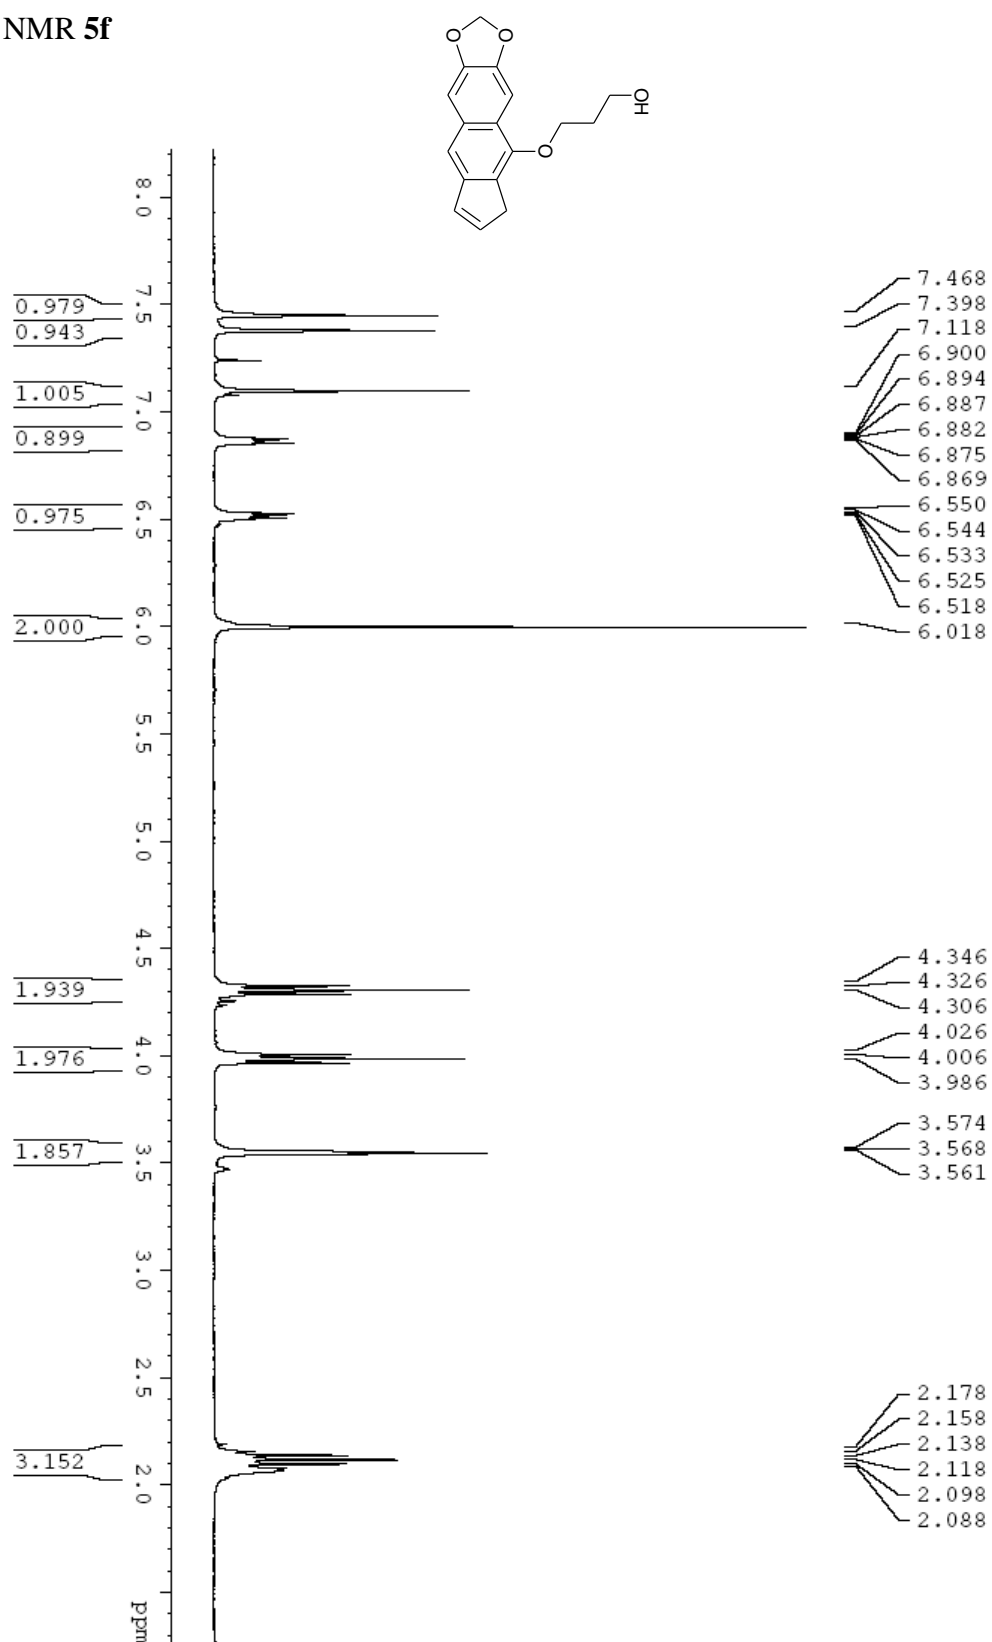

<sup>13</sup>C NMR 5f

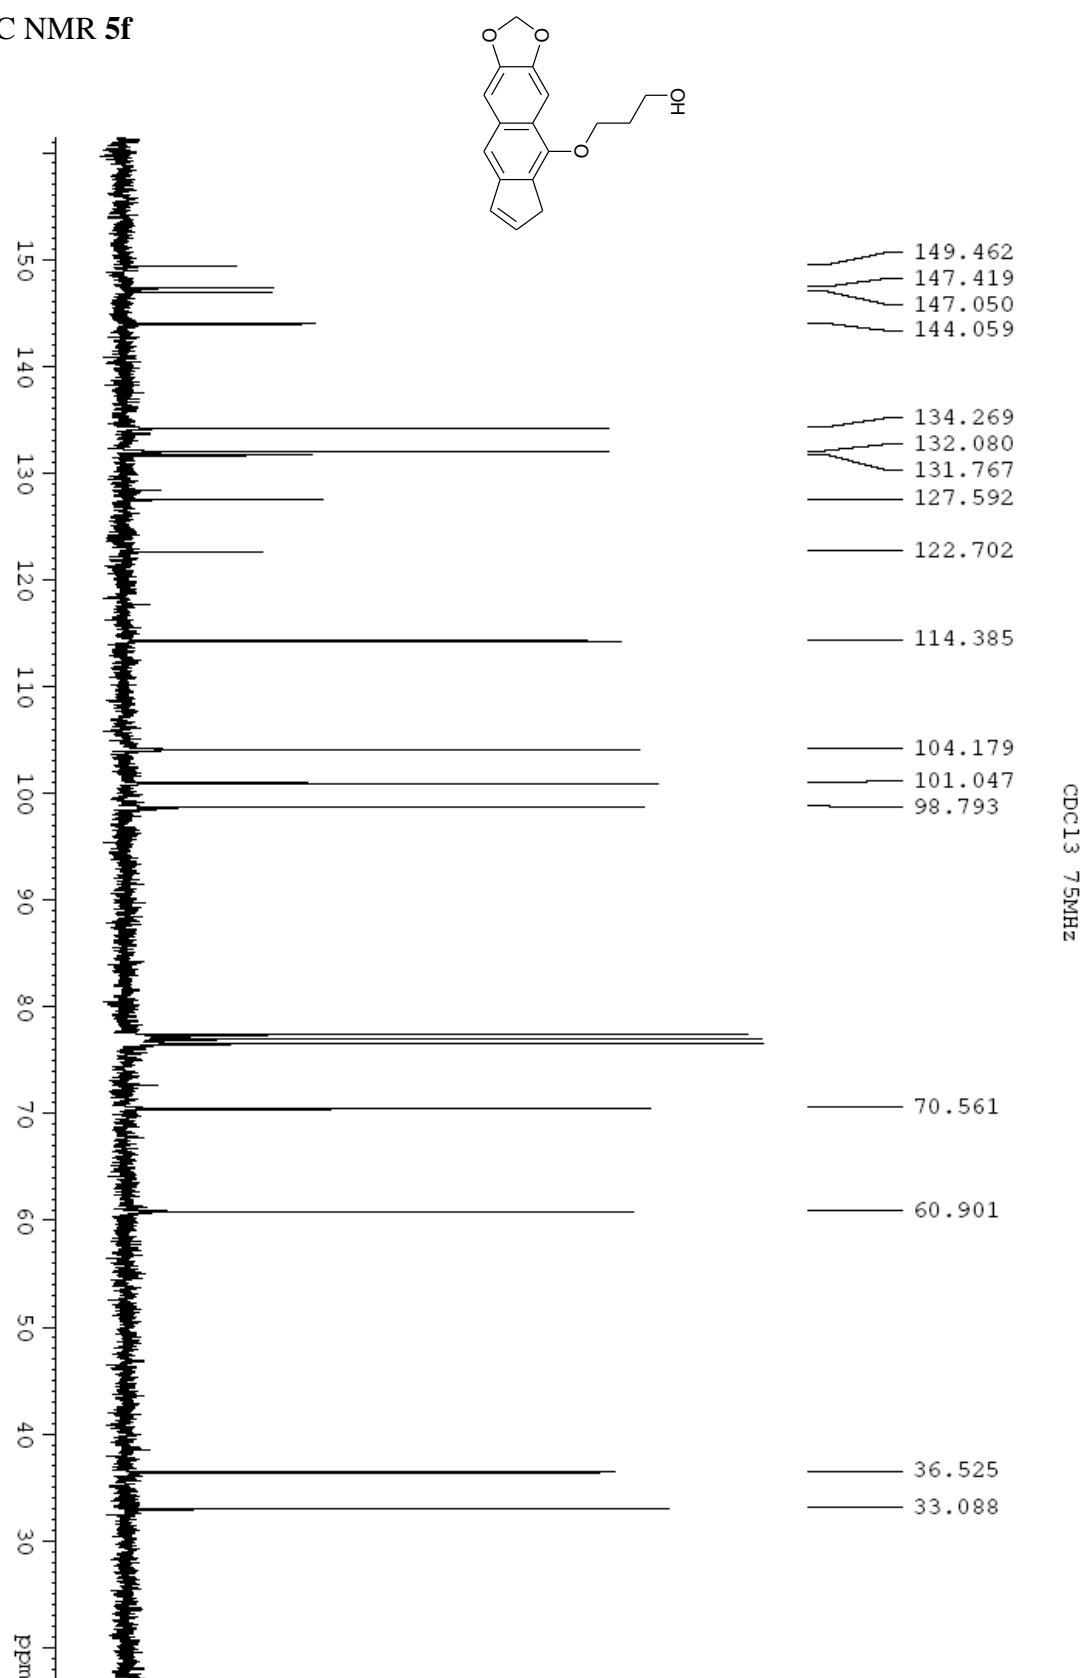

<sup>1</sup>H NMR **6f**

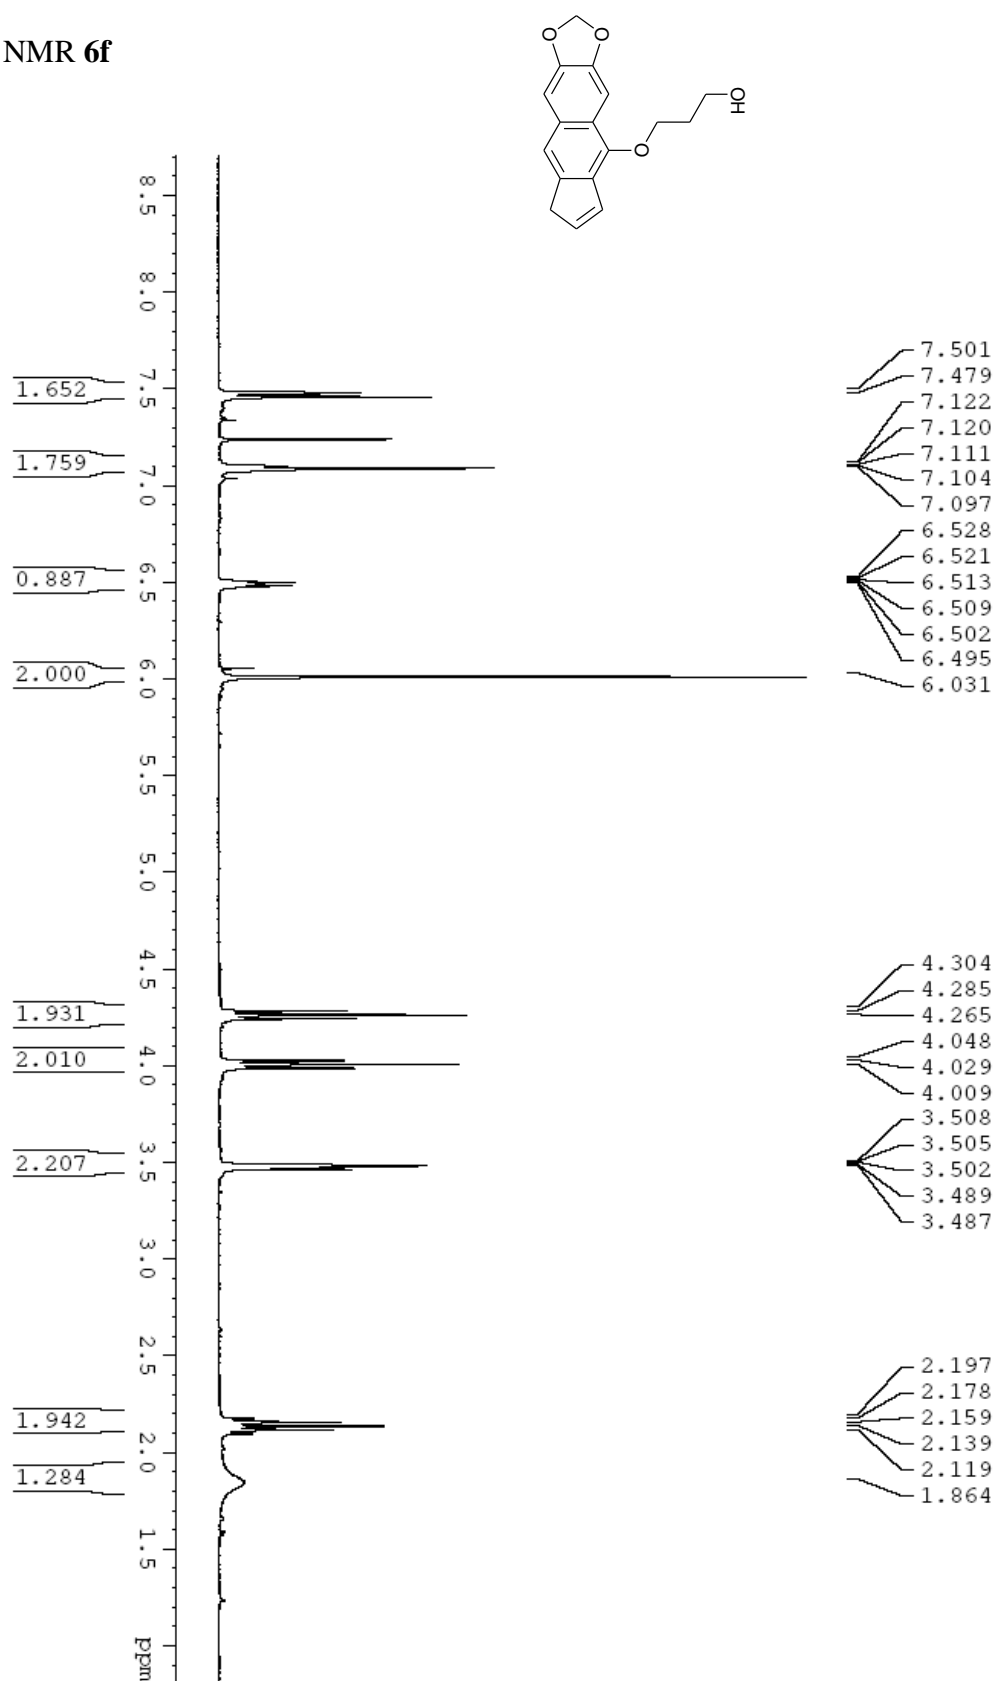

CDCl<sub>3</sub> 300MHz

<sup>13</sup>C NMR 6f

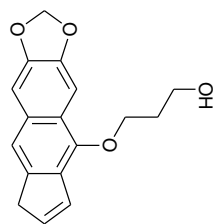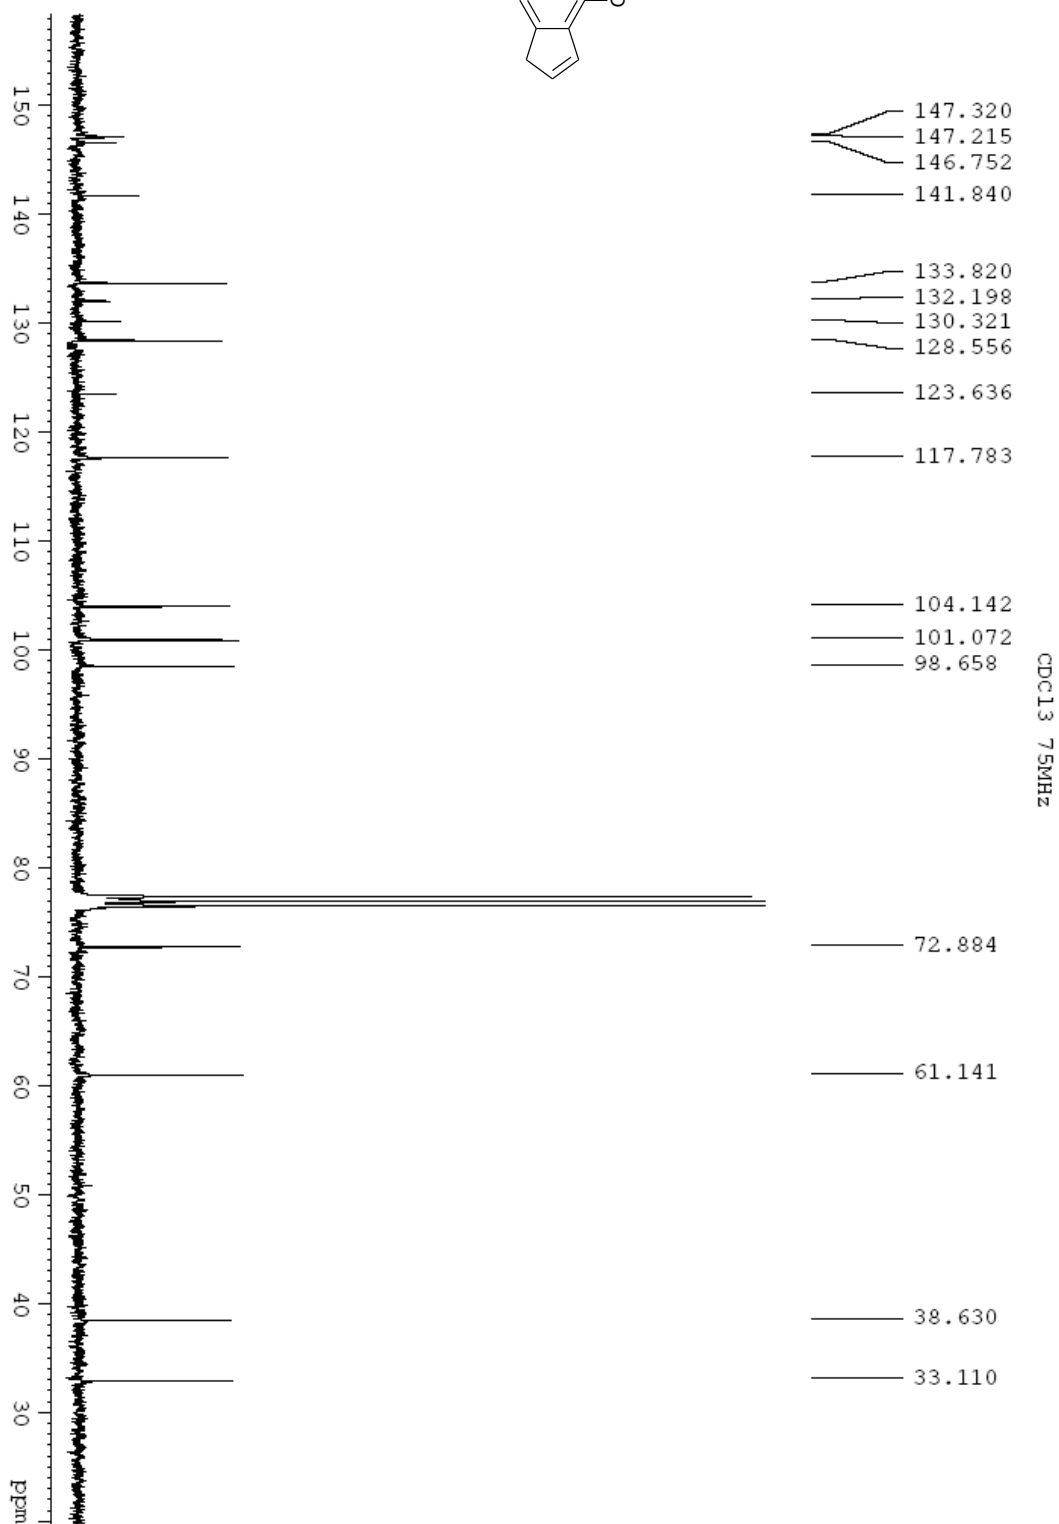

<sup>1</sup>H NMR 25a

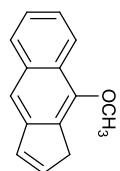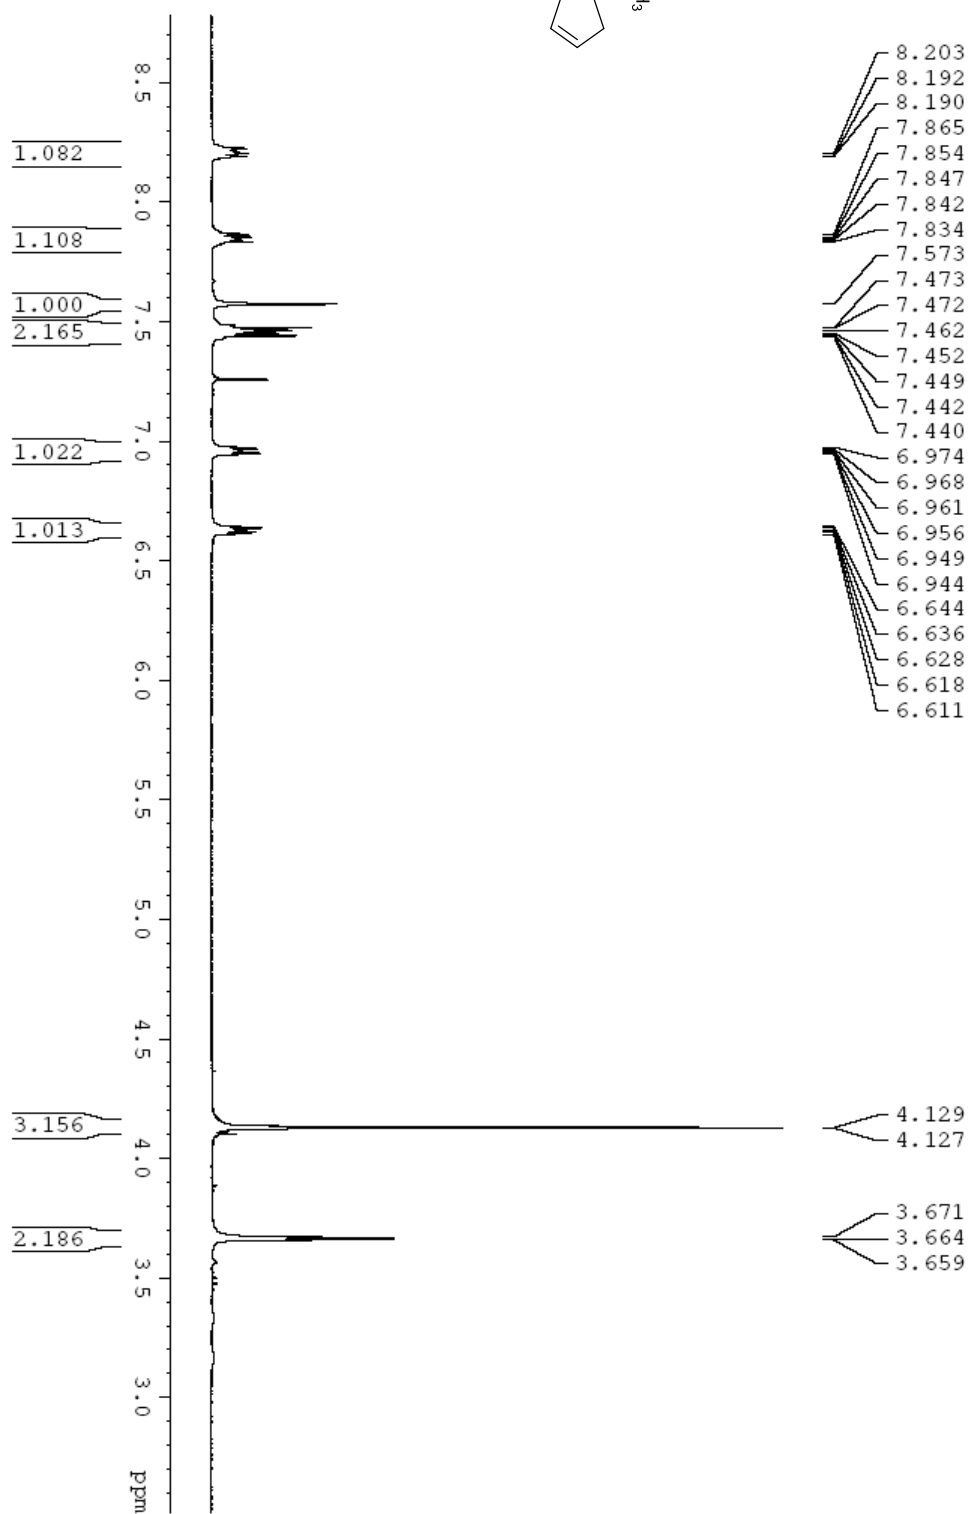

<sup>13</sup>C NMR 25a

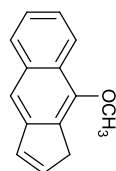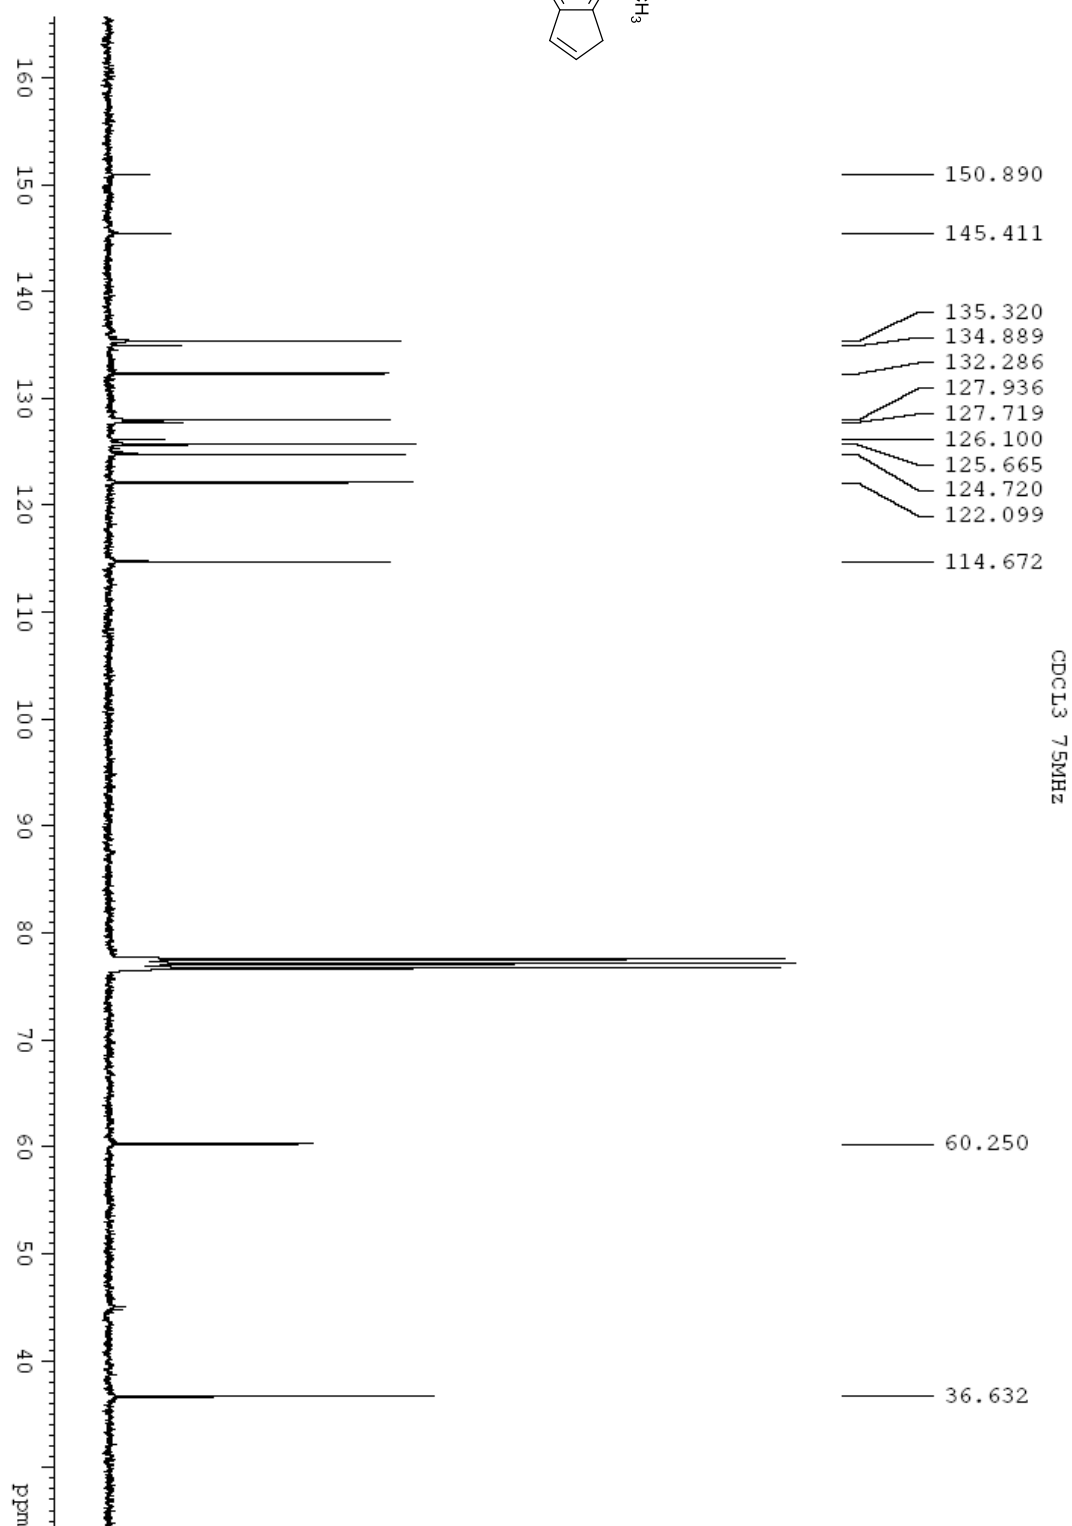

$^1\text{H}$  NMR 25a + 26a

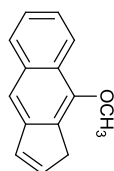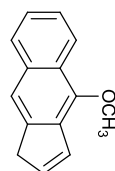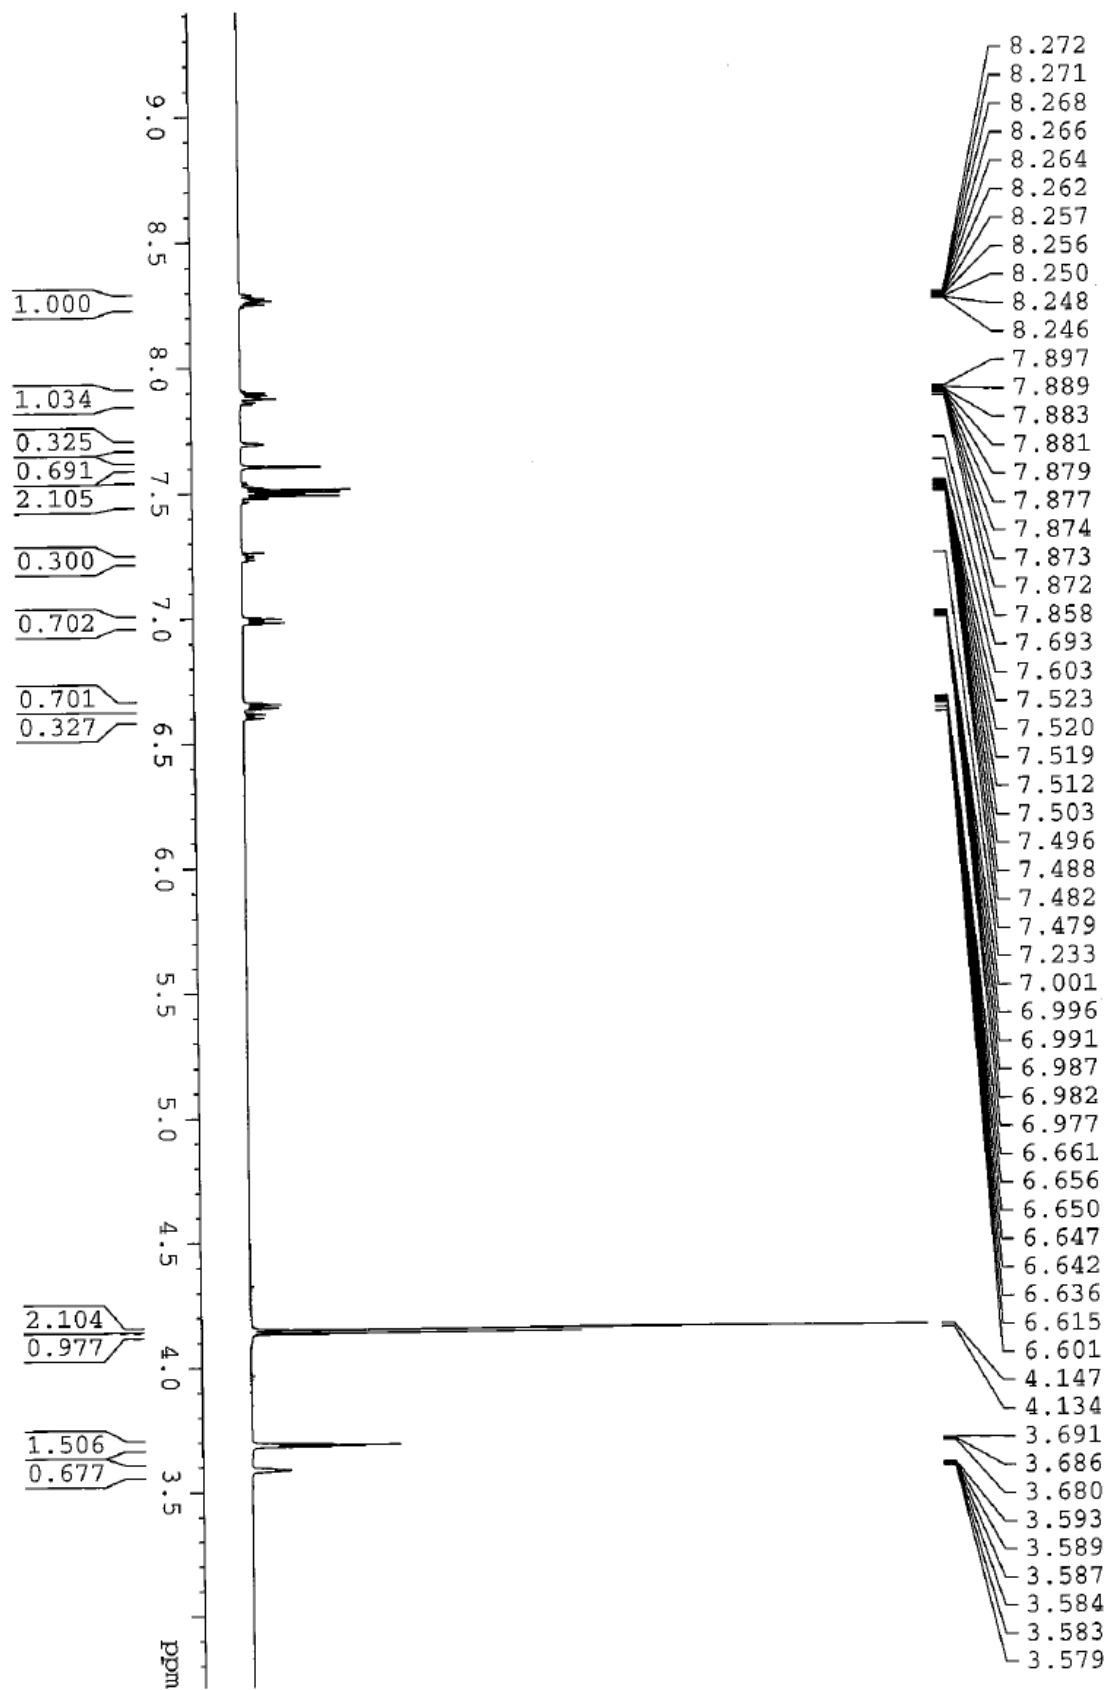

$^{13}\text{C}$  NMR 25a + 26a

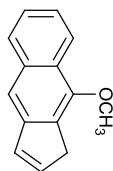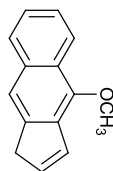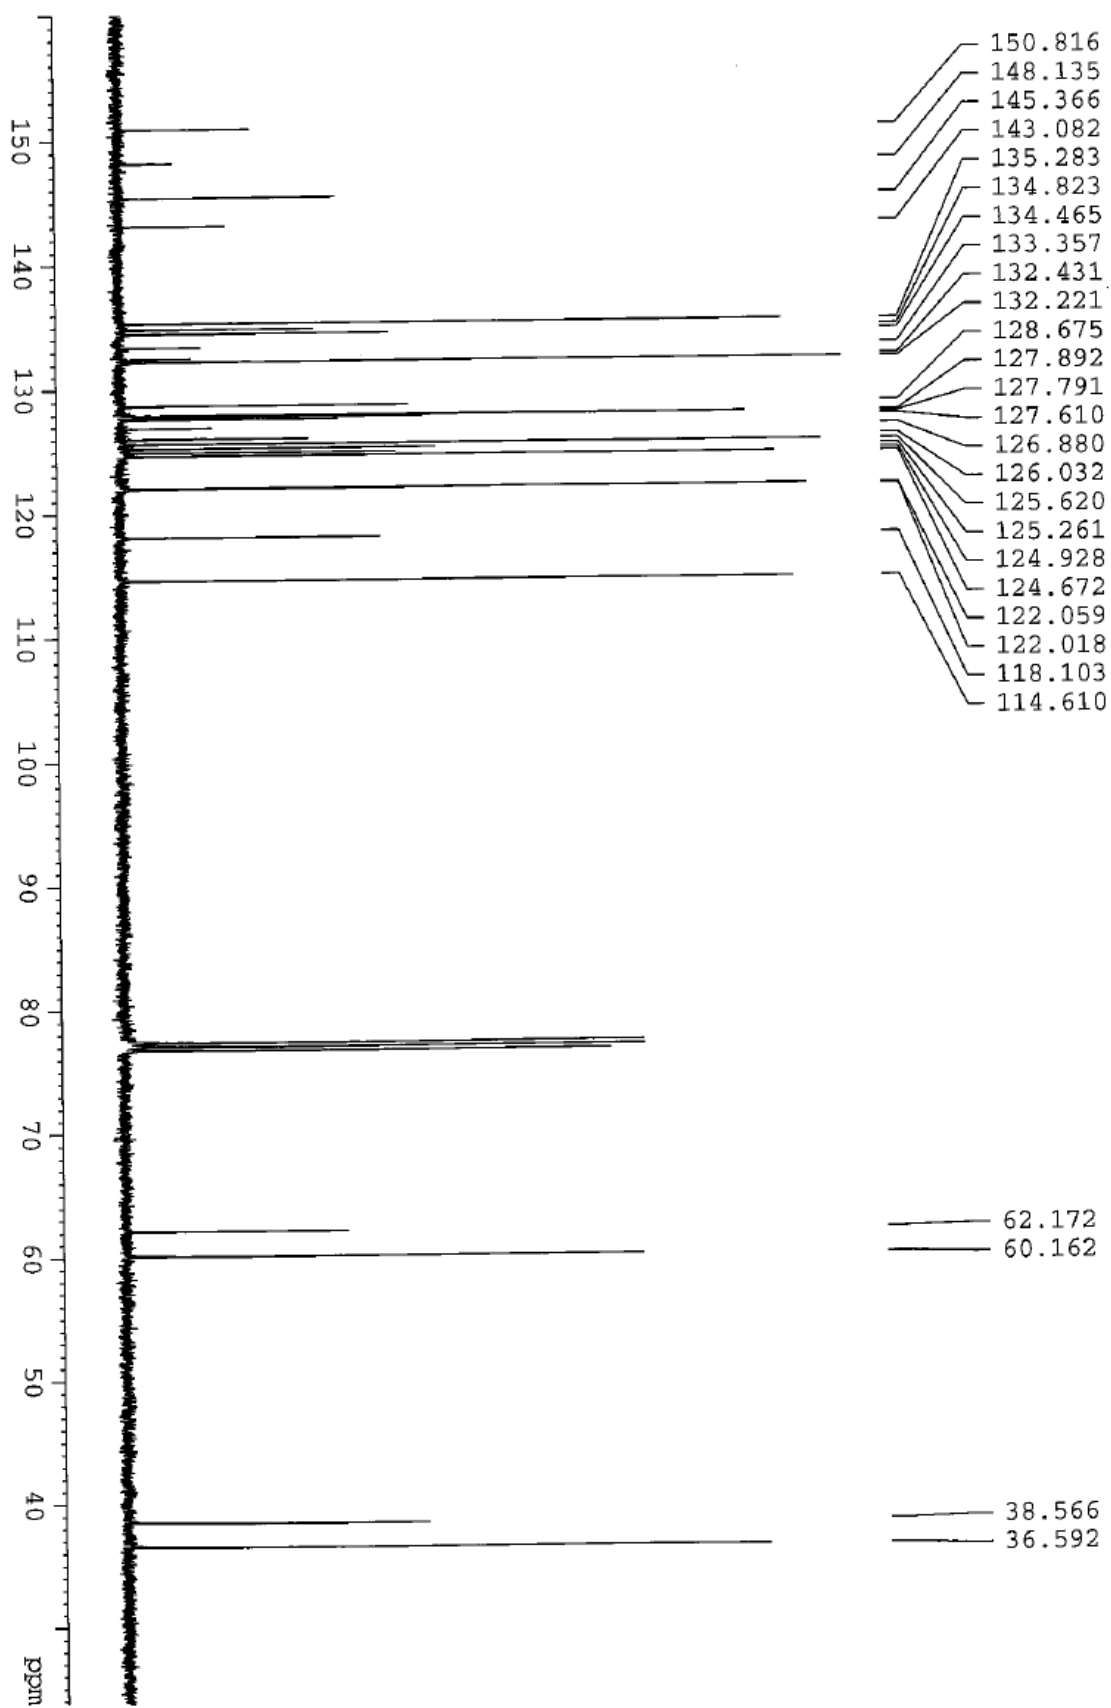



<sup>1</sup>H NMR 25b

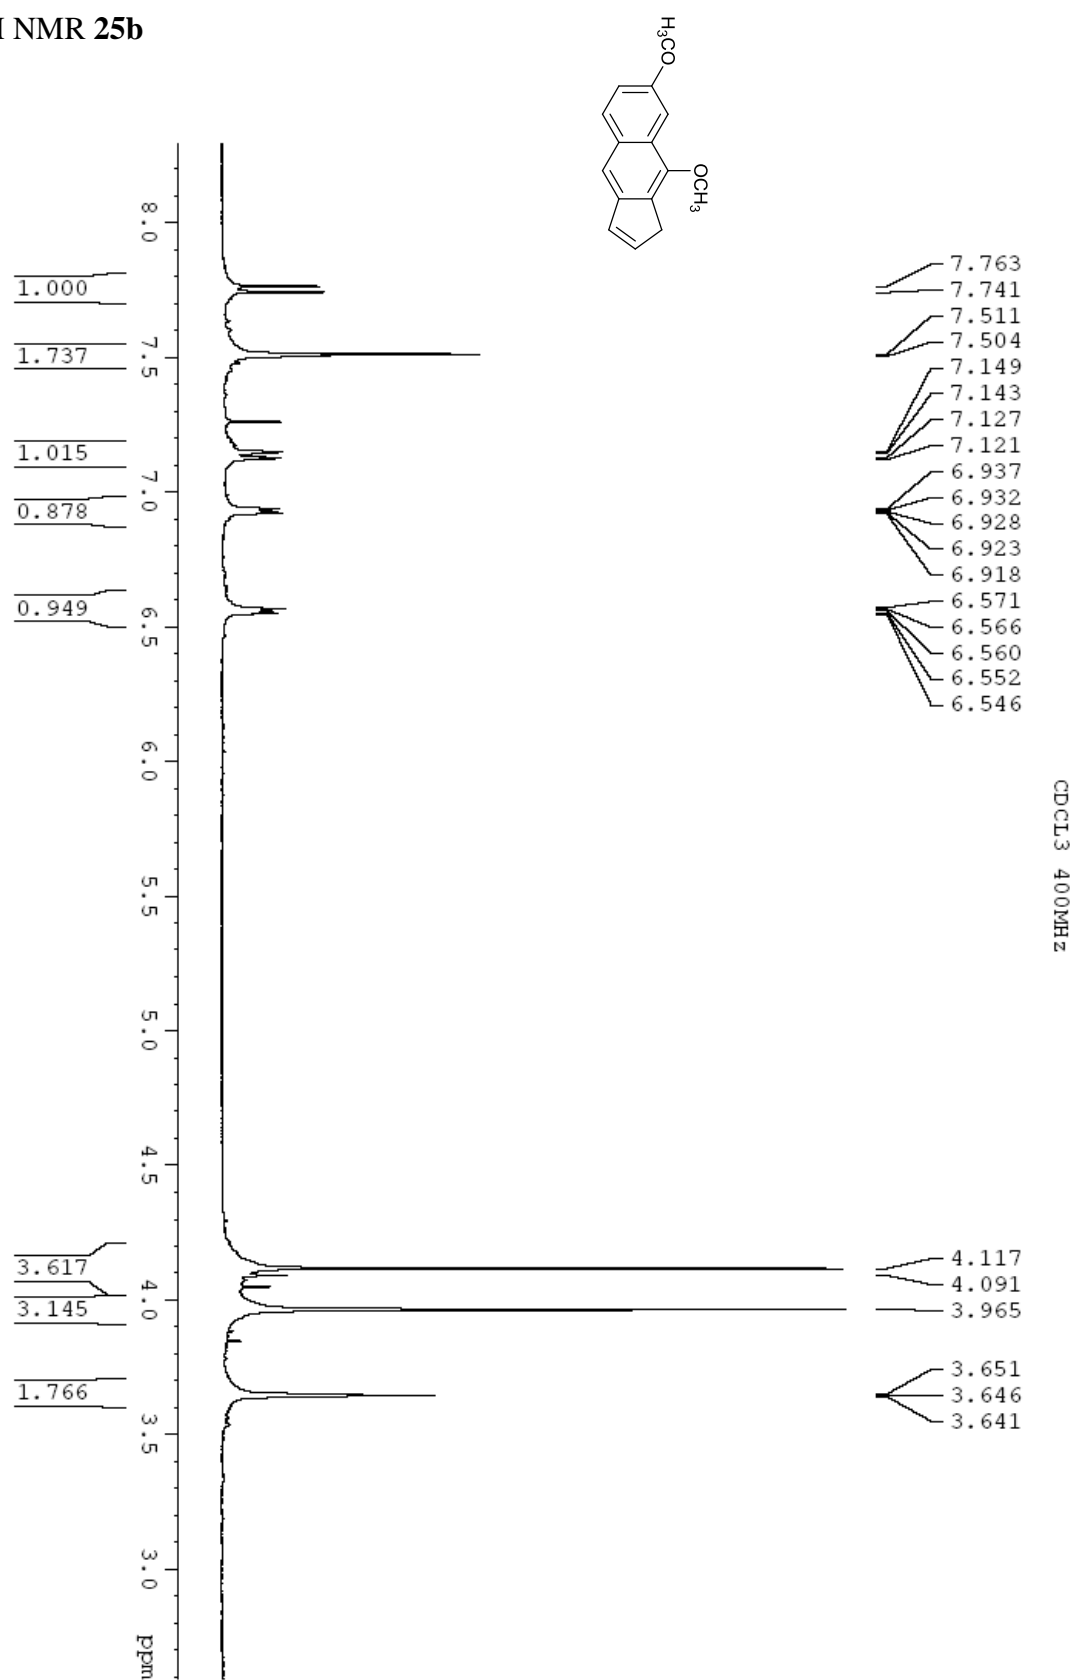

<sup>13</sup>C NMR 25b

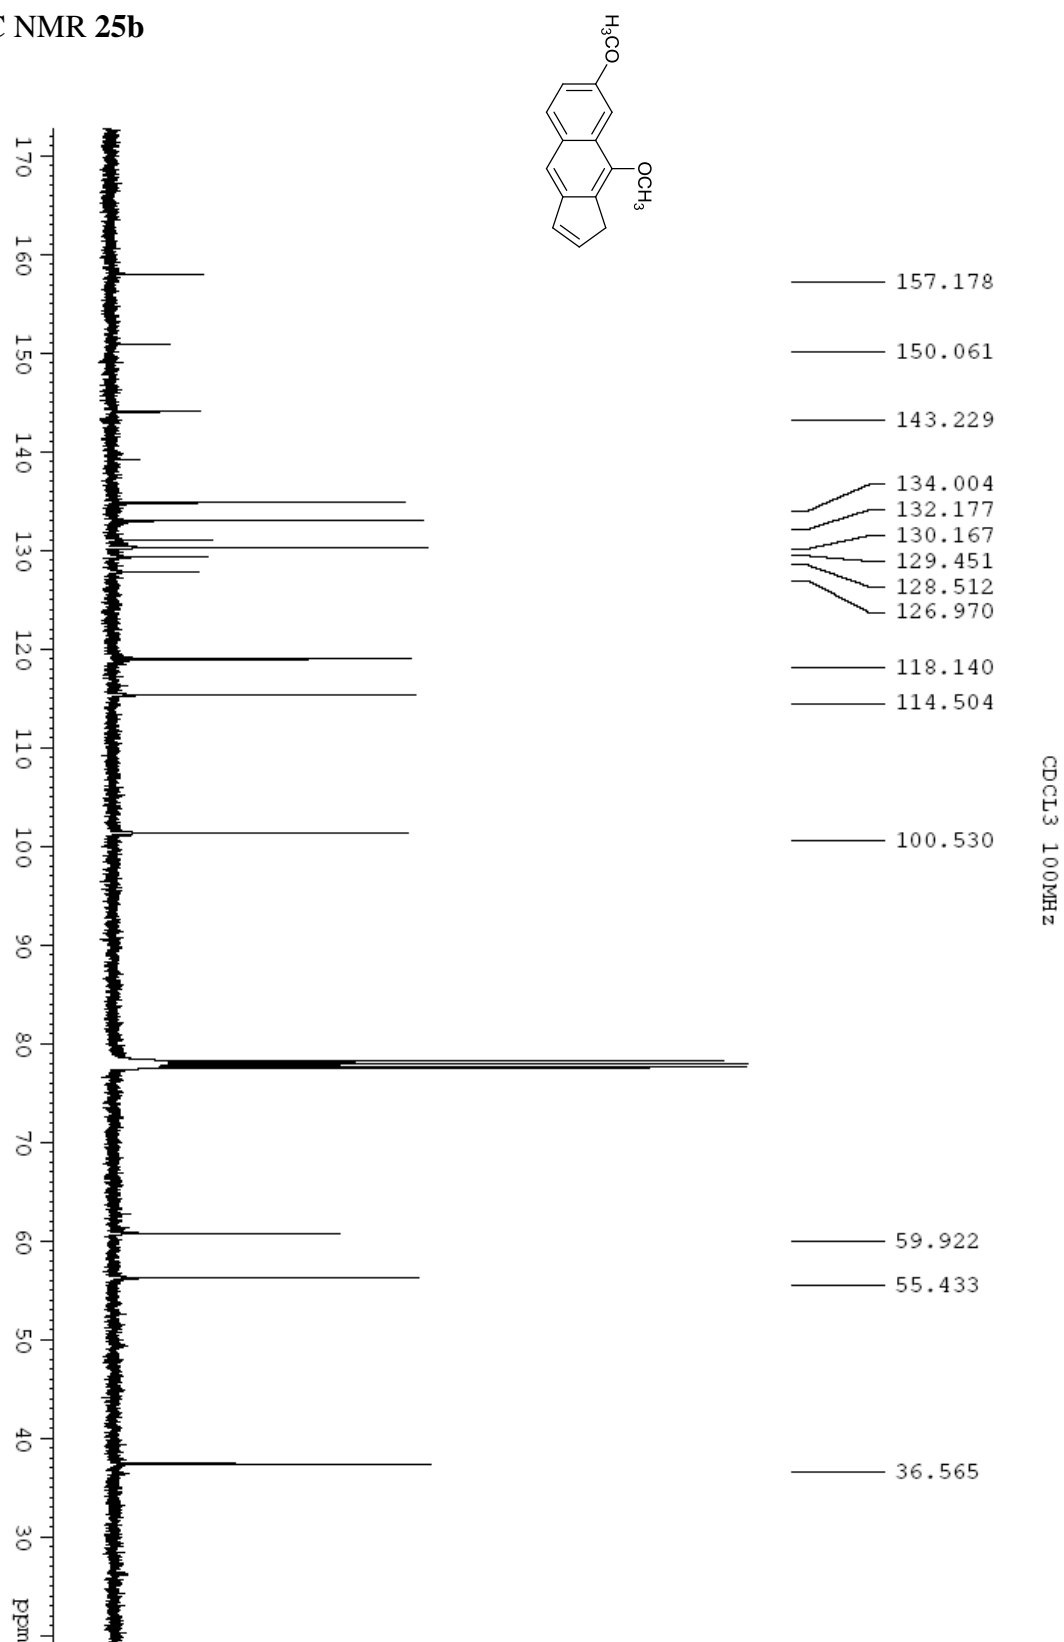

<sup>1</sup>H NMR 26b

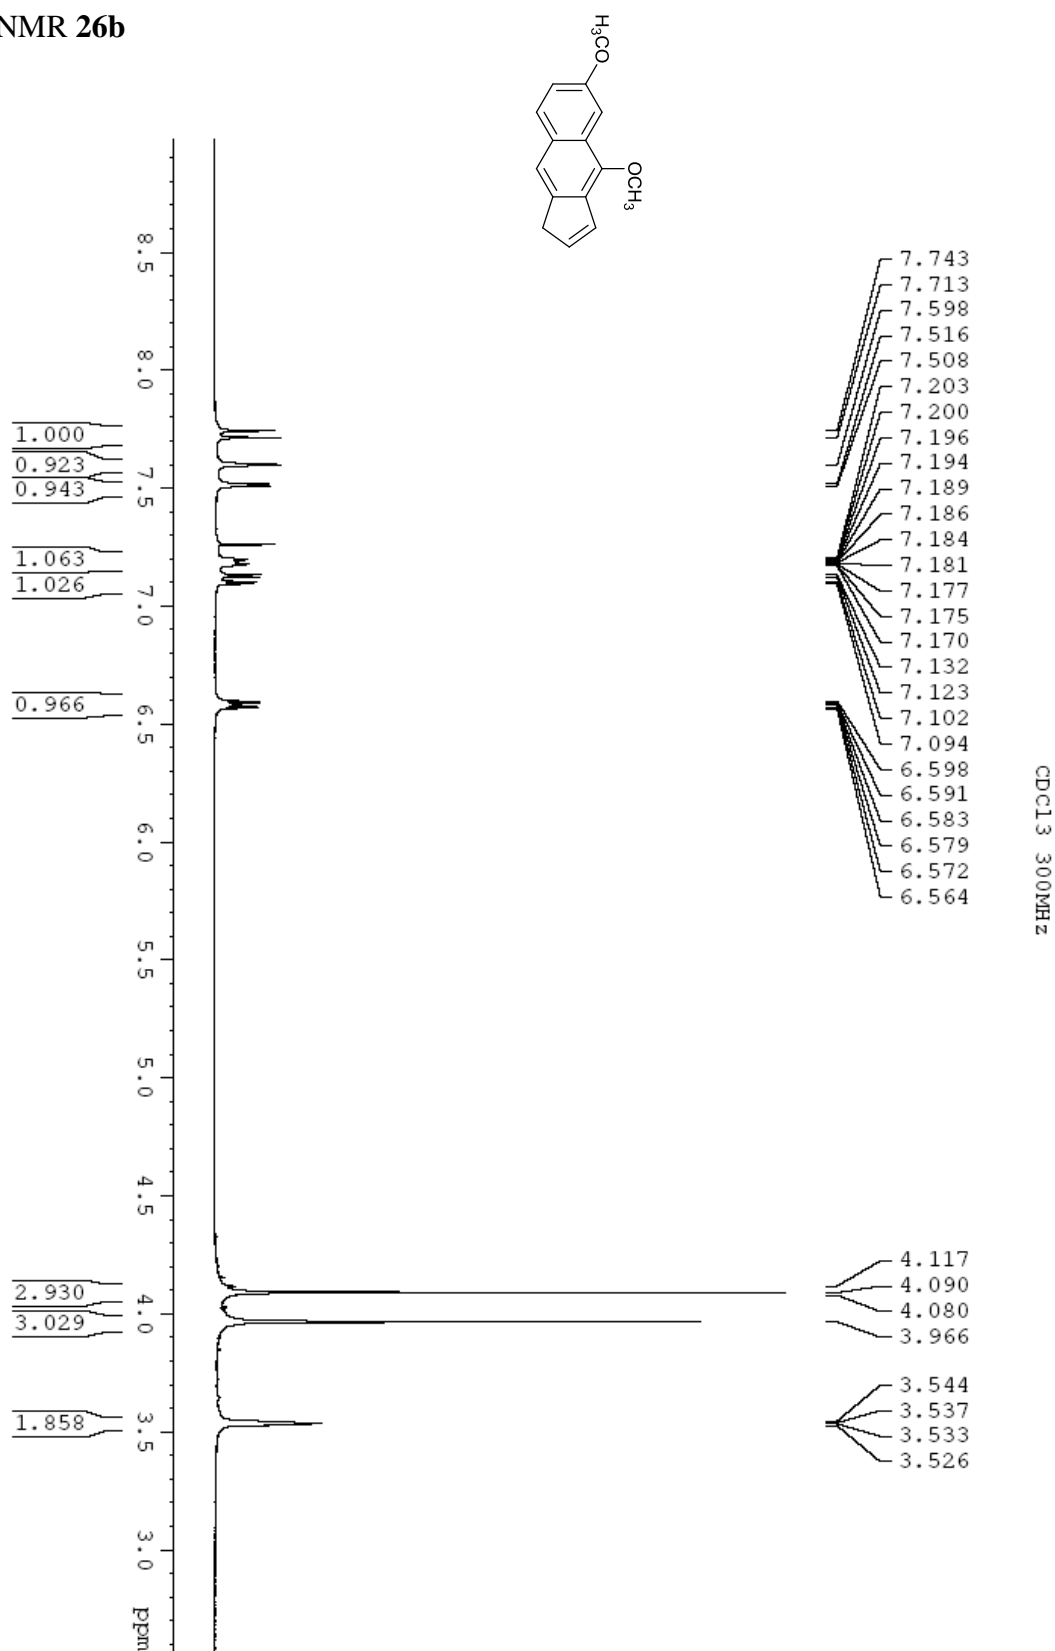

<sup>13</sup>C NMR 26b

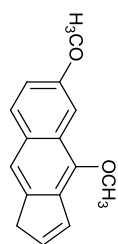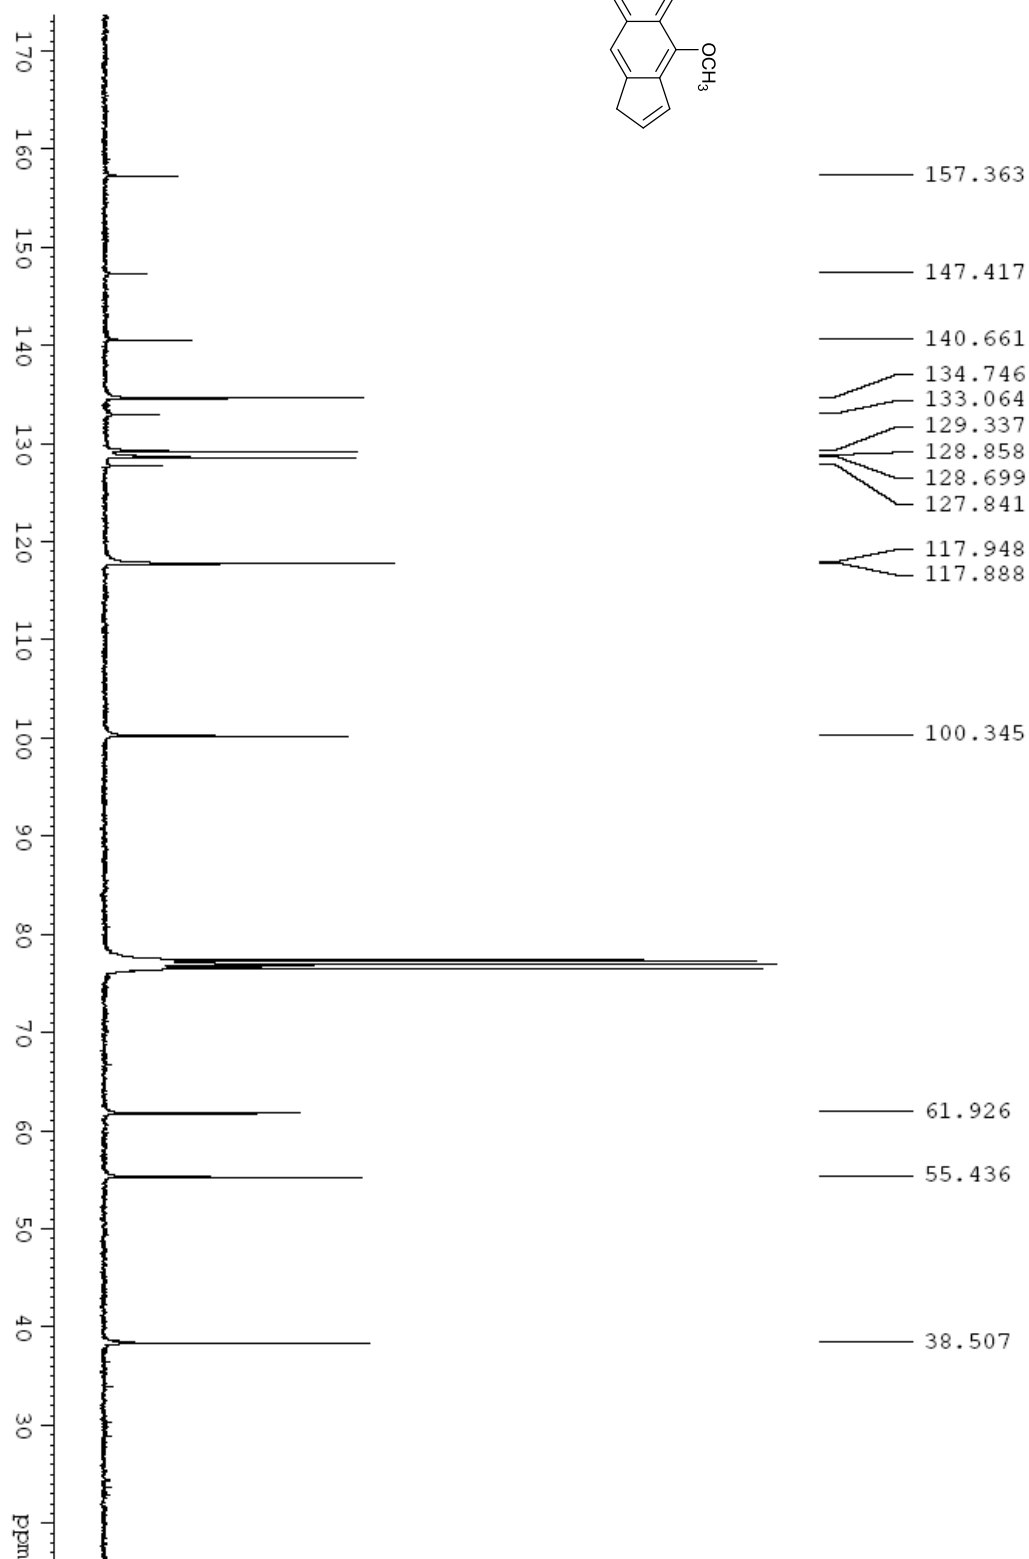

<sup>1</sup>H NMR 25c

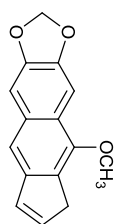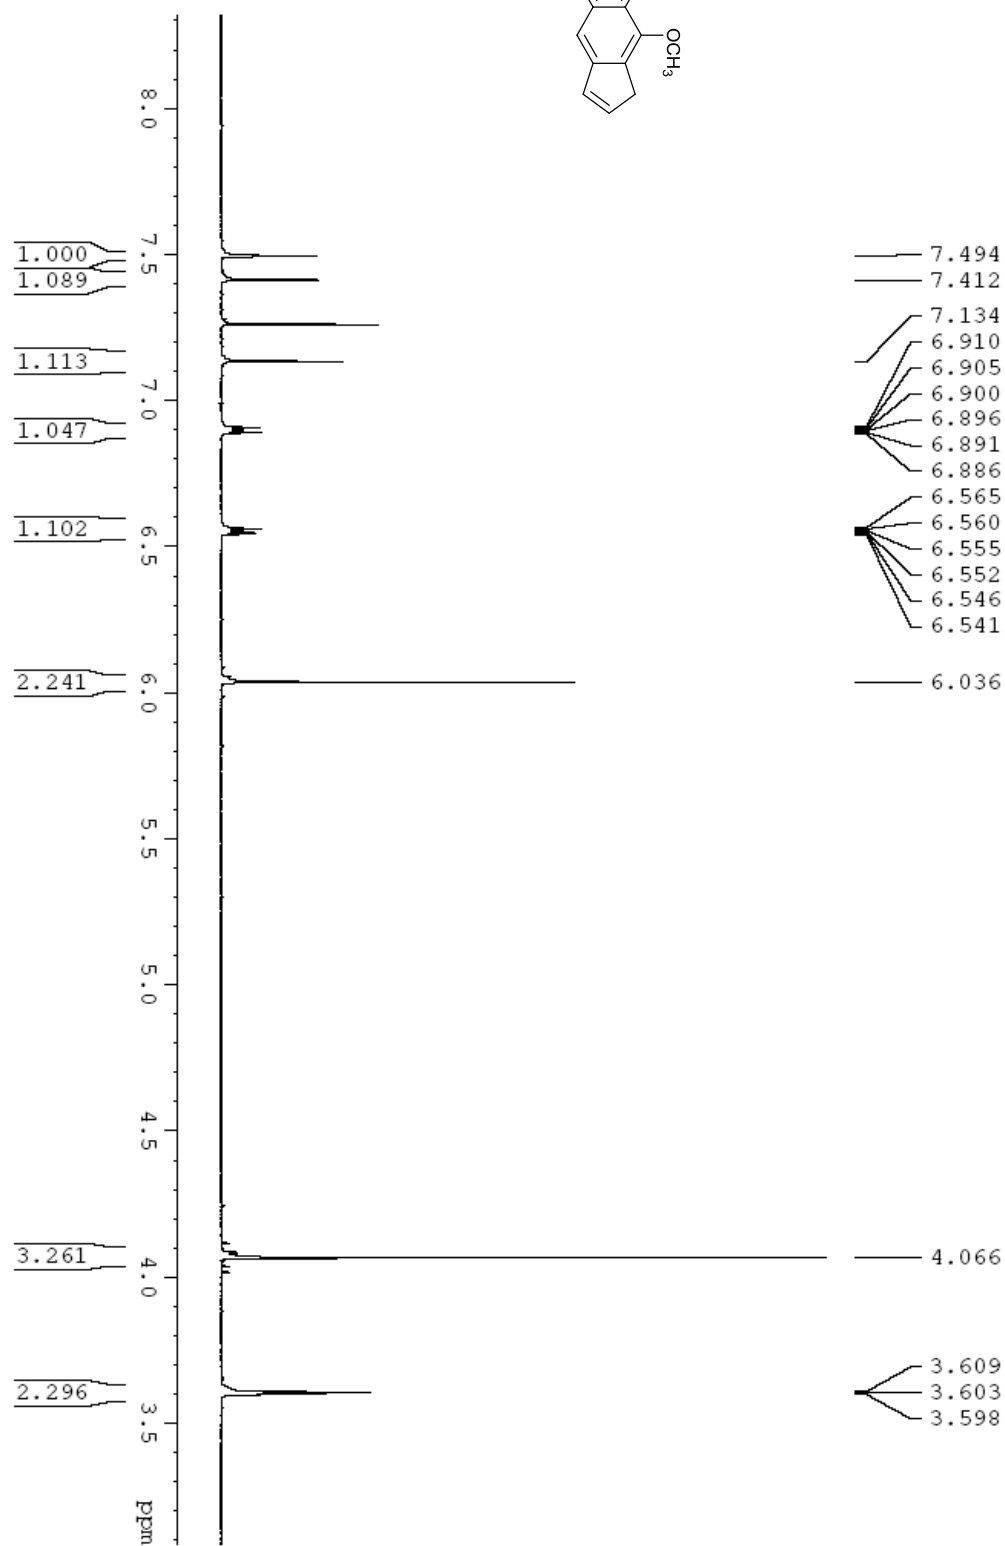

<sup>13</sup>C NMR **25c**

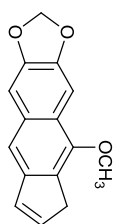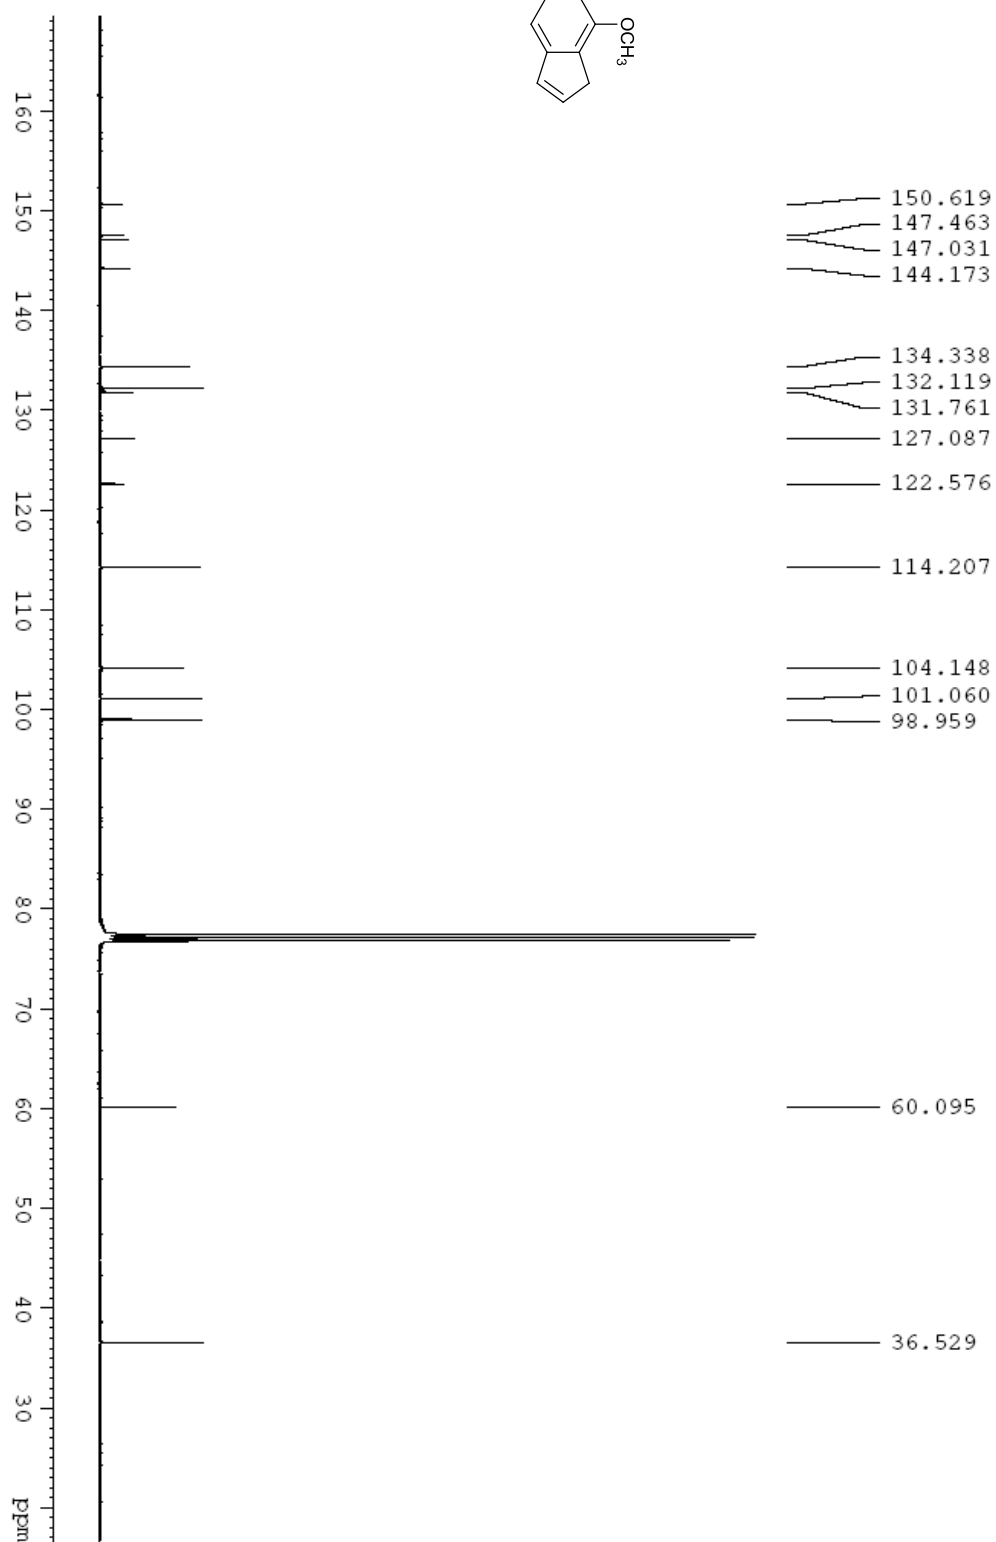

<sup>1</sup>H NMR 26c

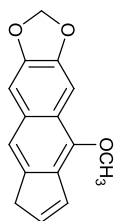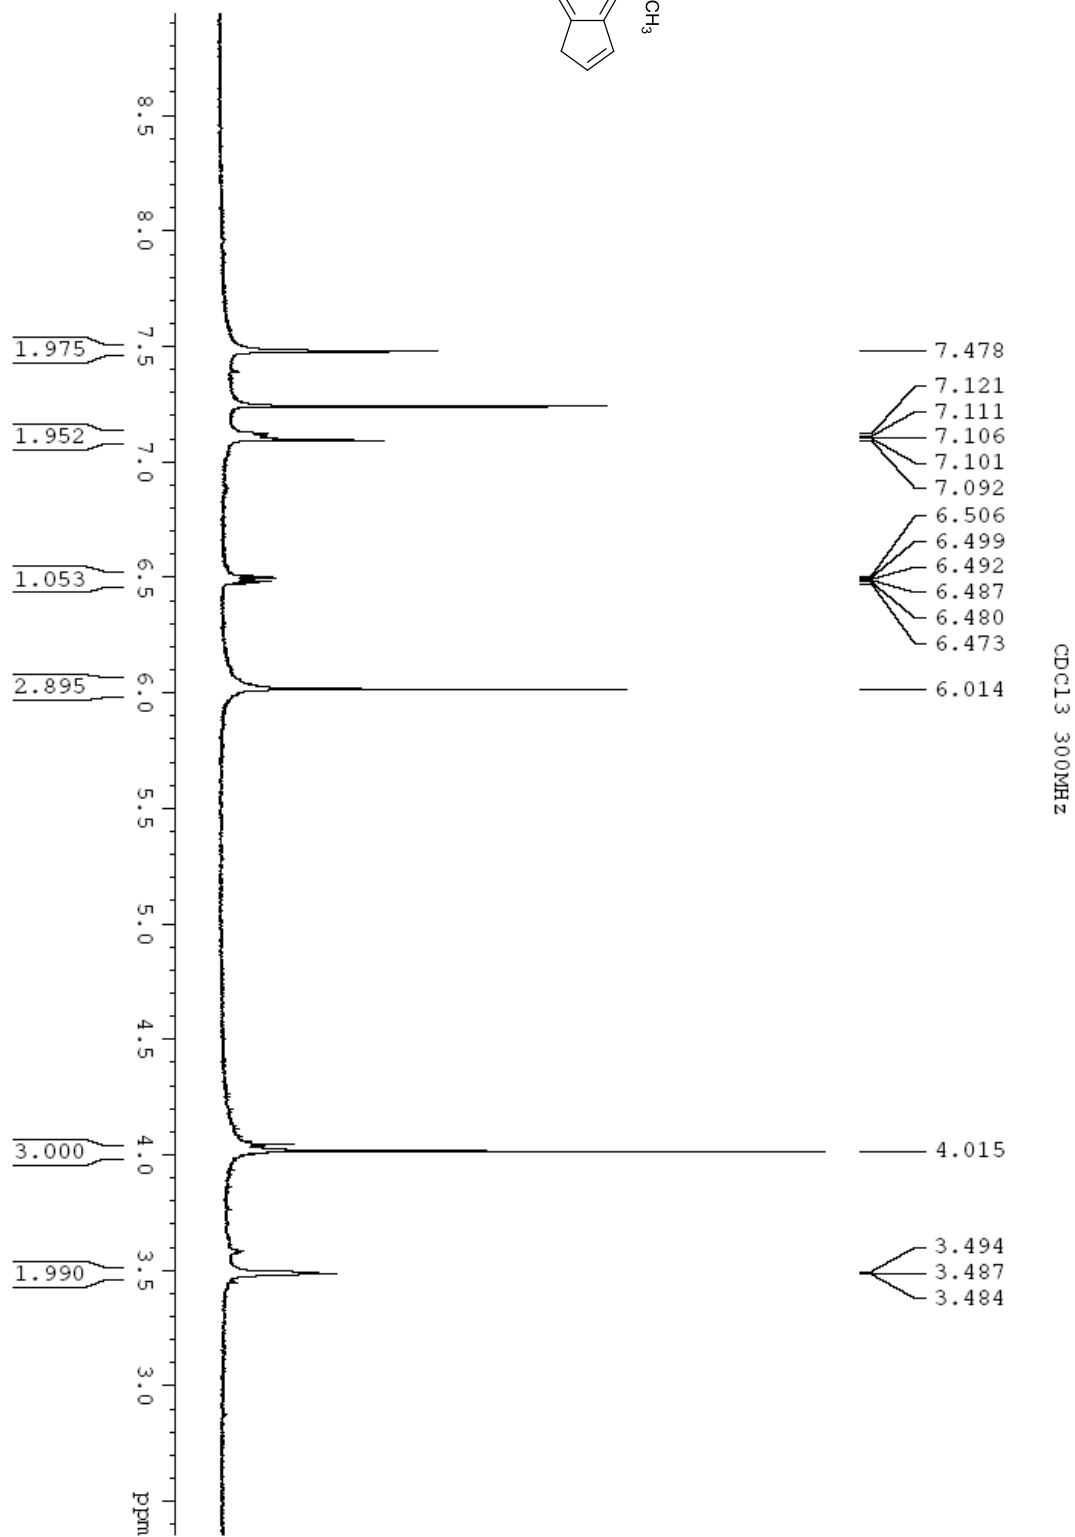

<sup>13</sup>C NMR 26c

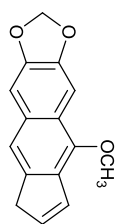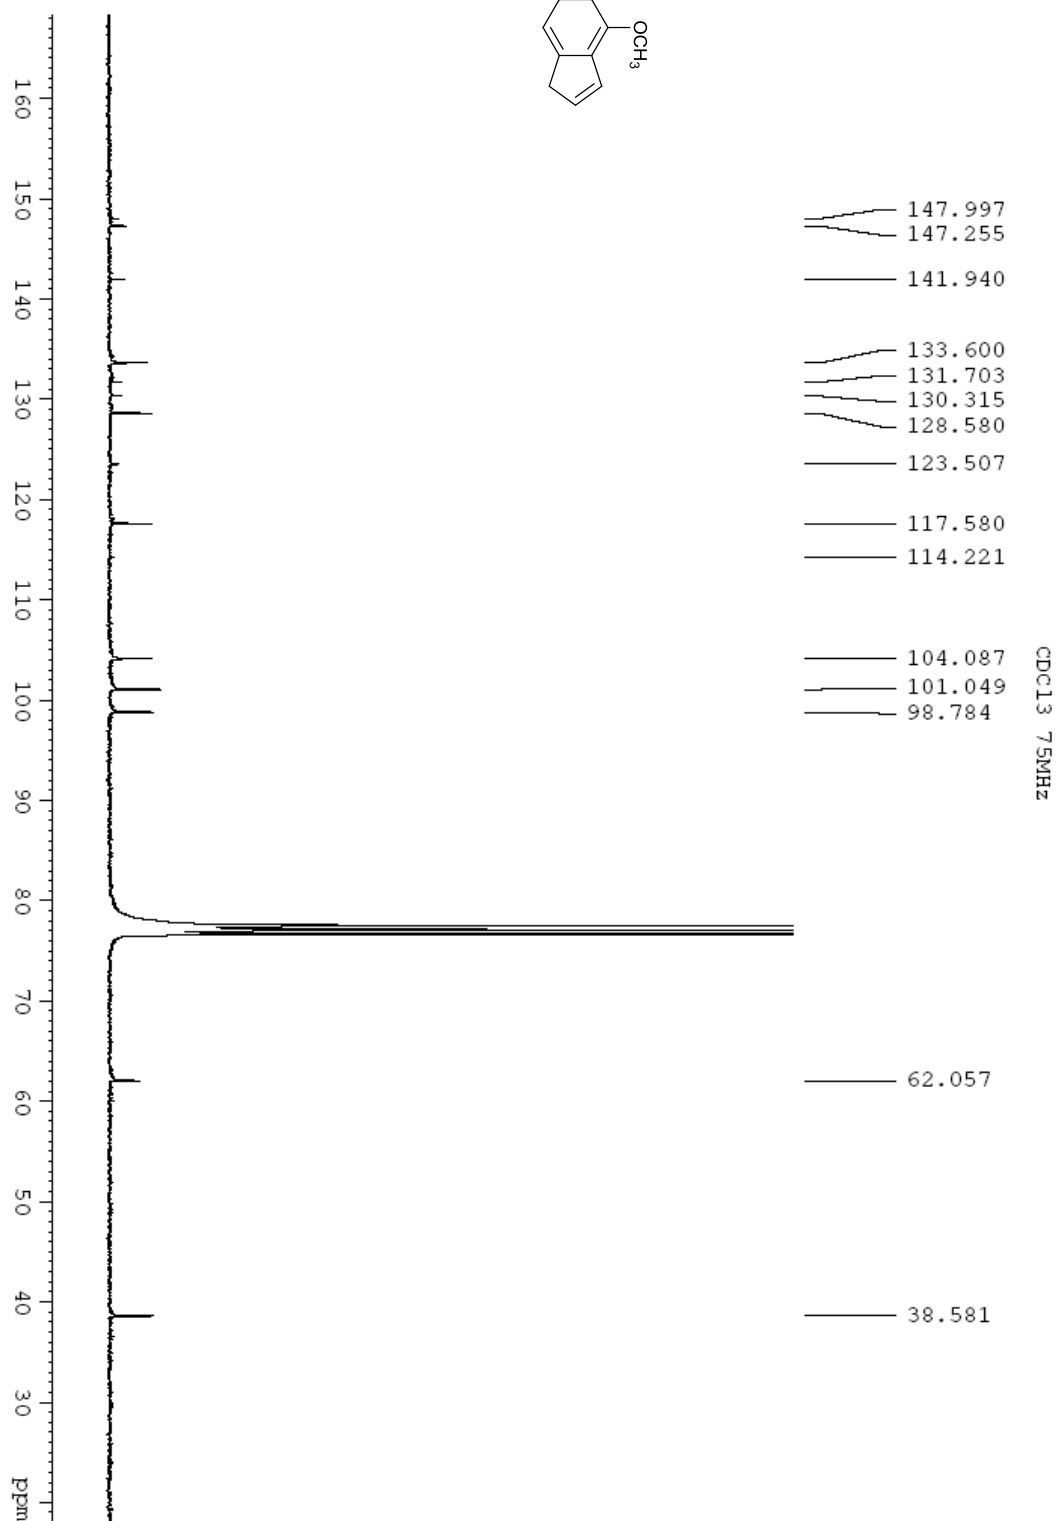



$^1\text{H}$  NMR 25d + 26d

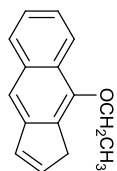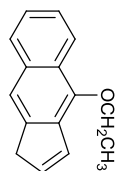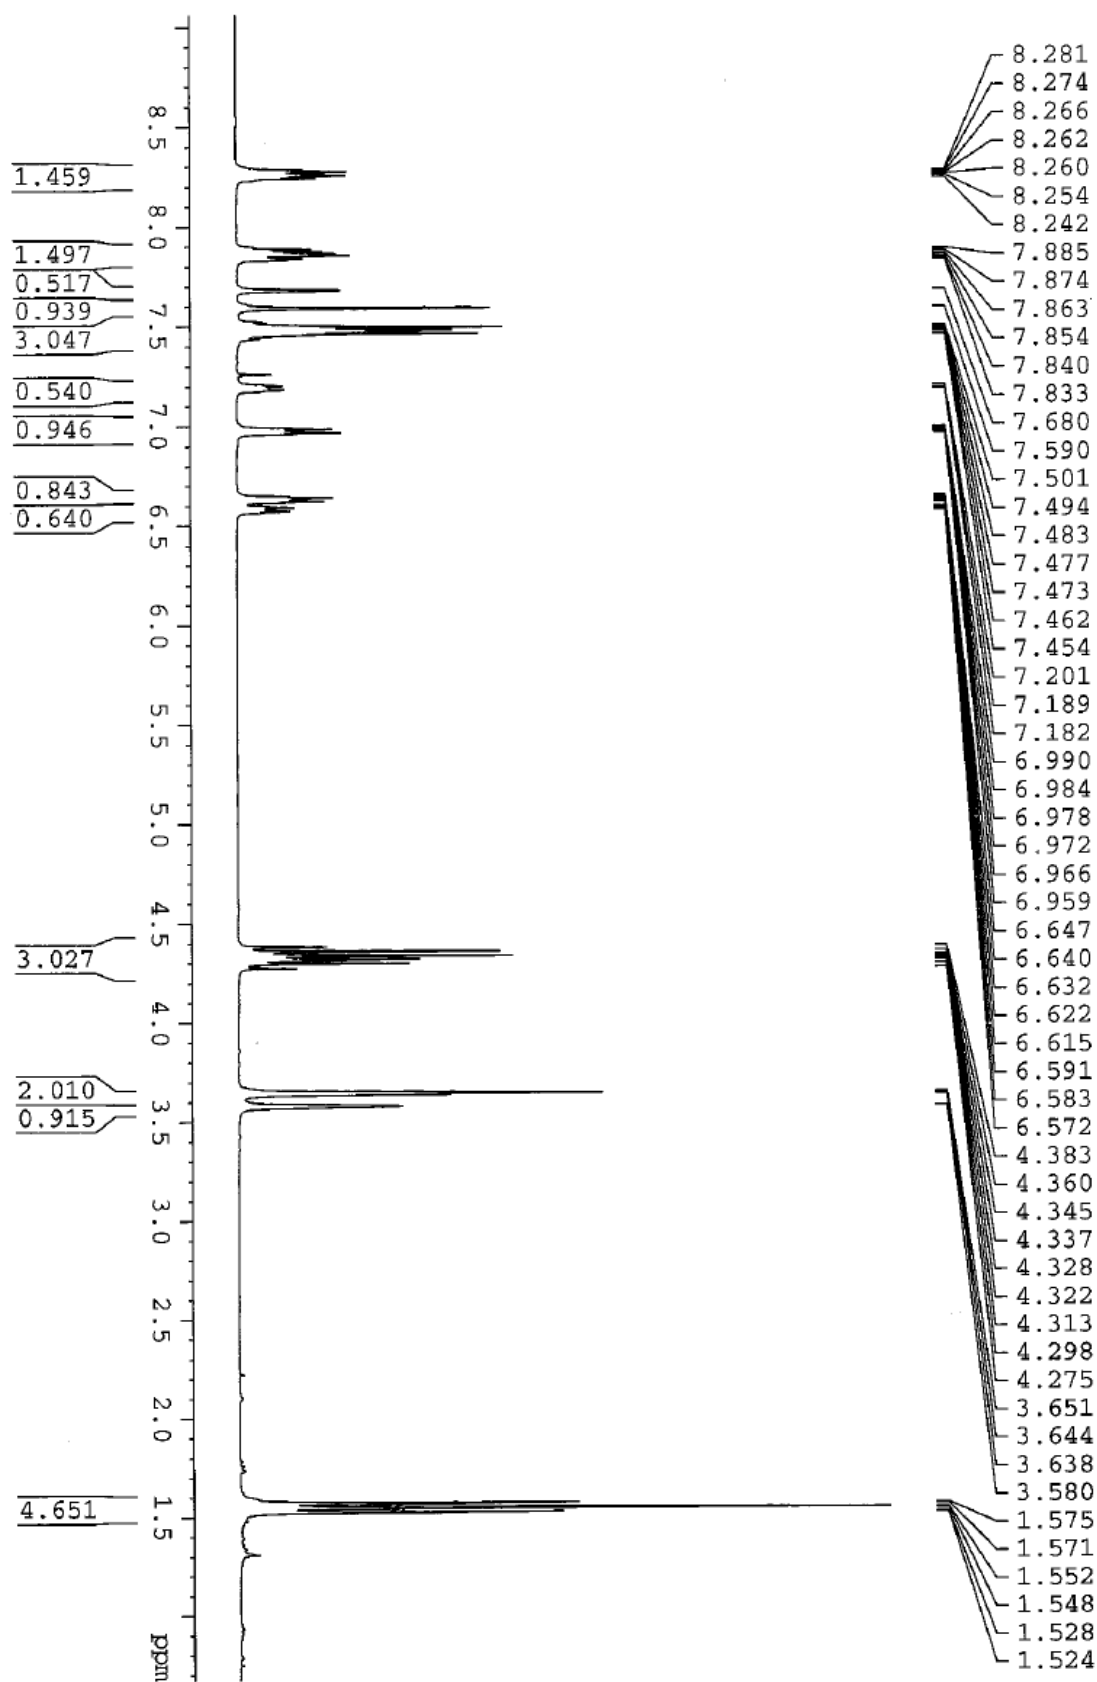

$^{13}\text{C}$  NMR 25d + 26d

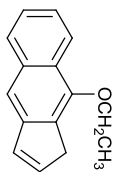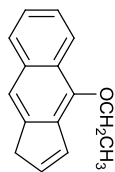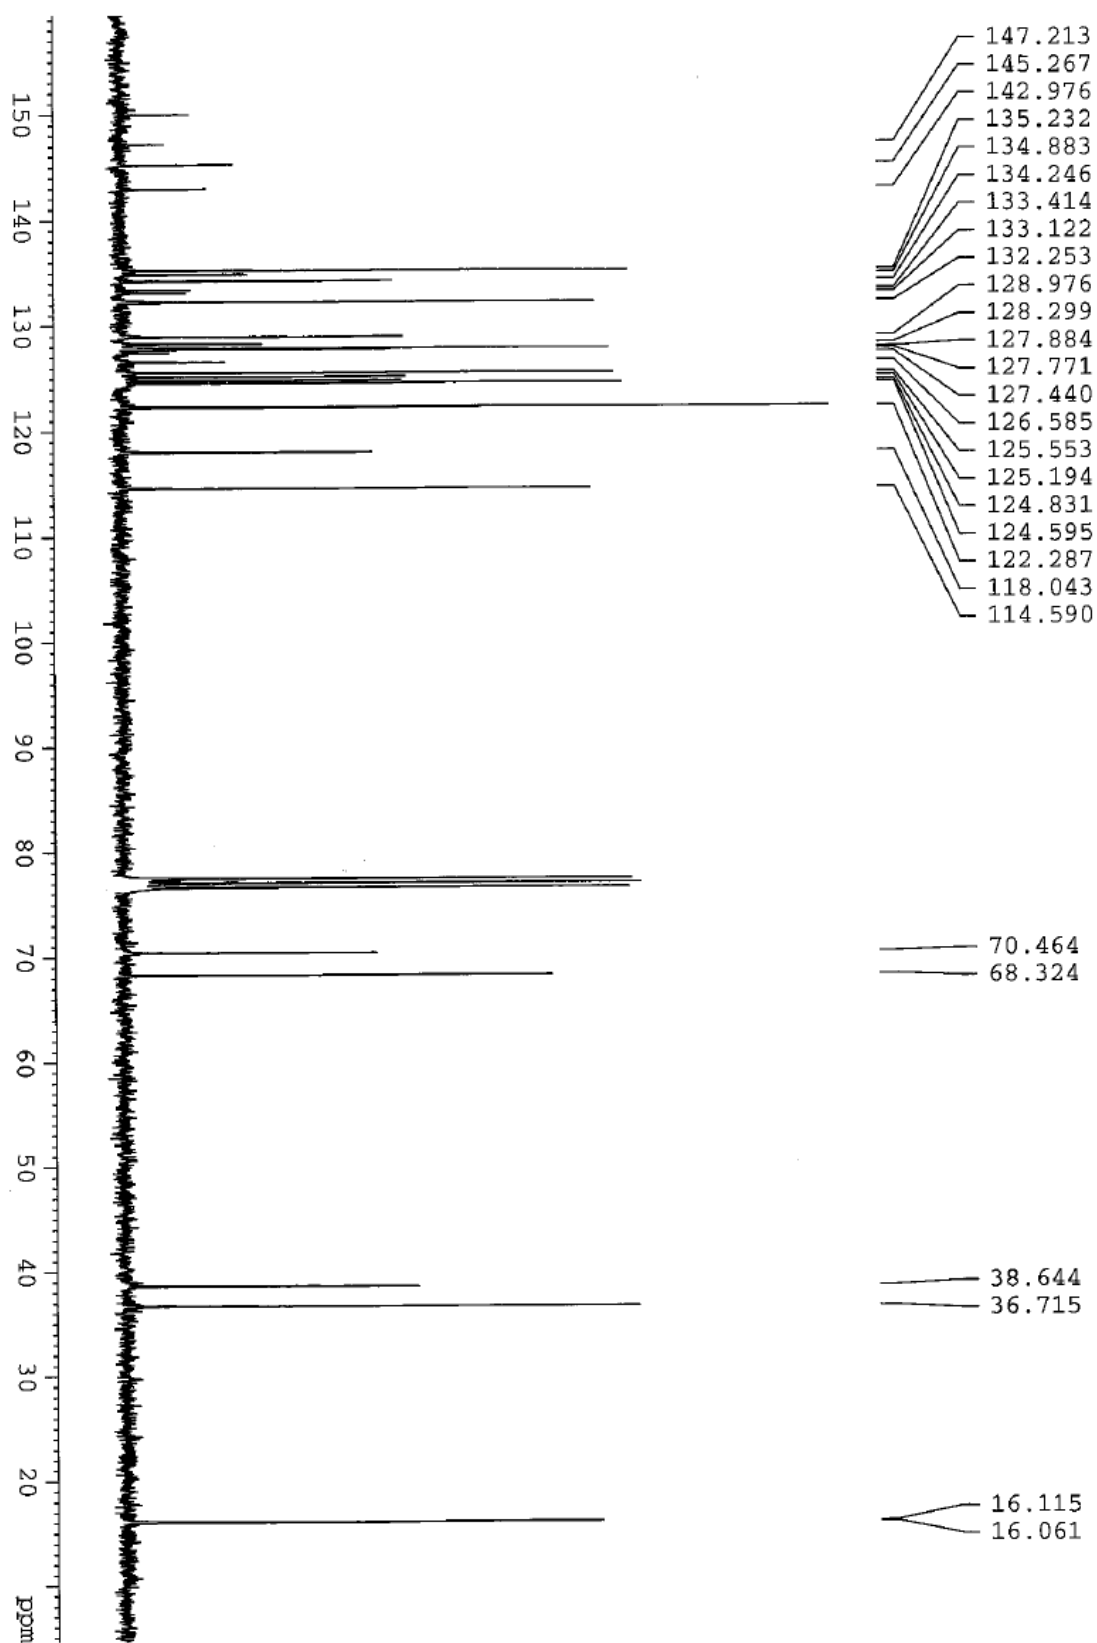

<sup>1</sup>H NMR 18

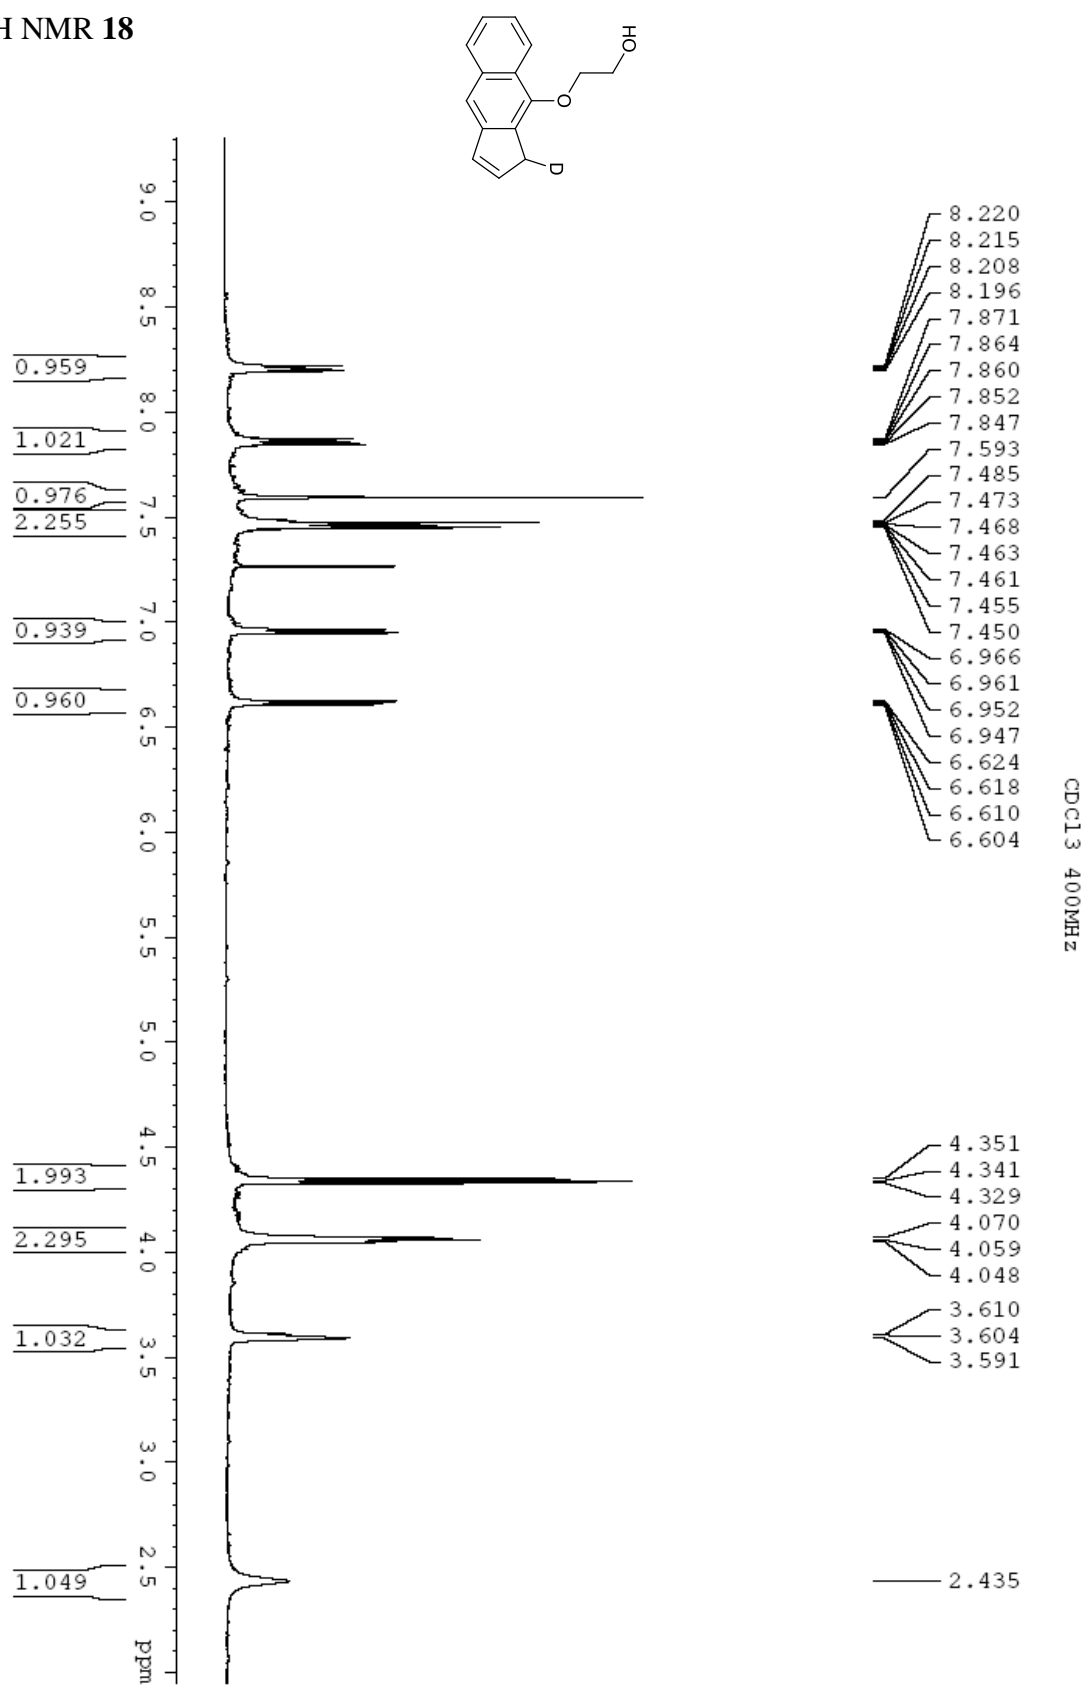

<sup>13</sup>C NMR 18

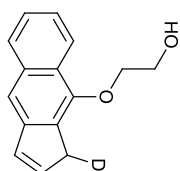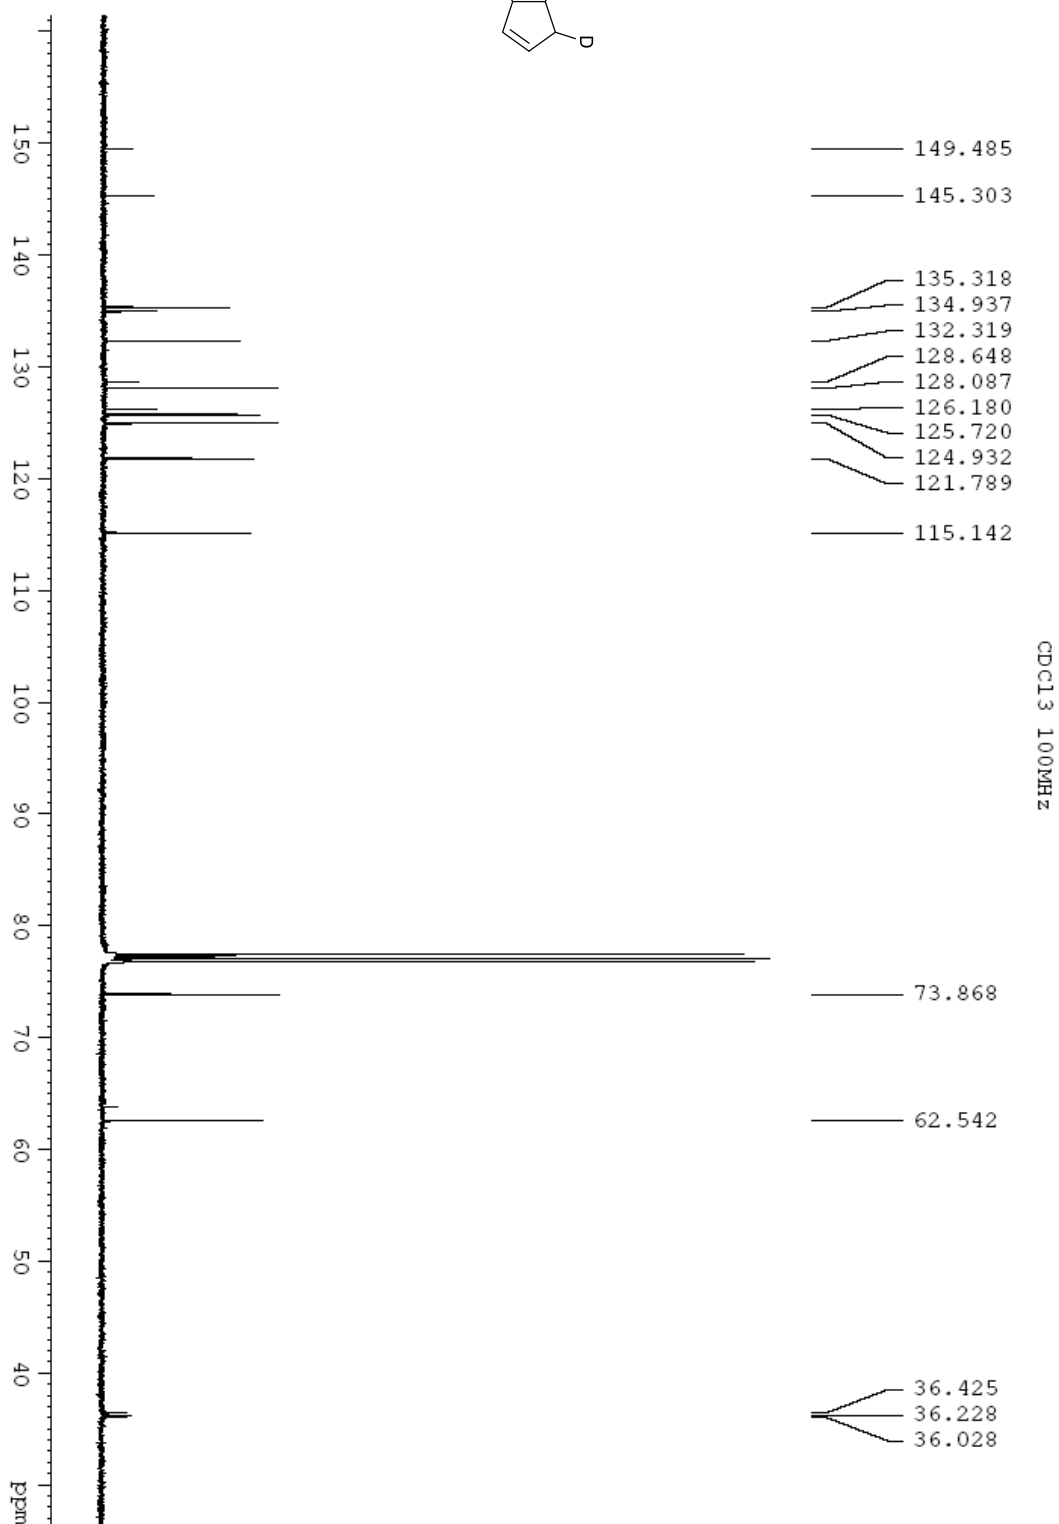

<sup>1</sup>H NMR 19

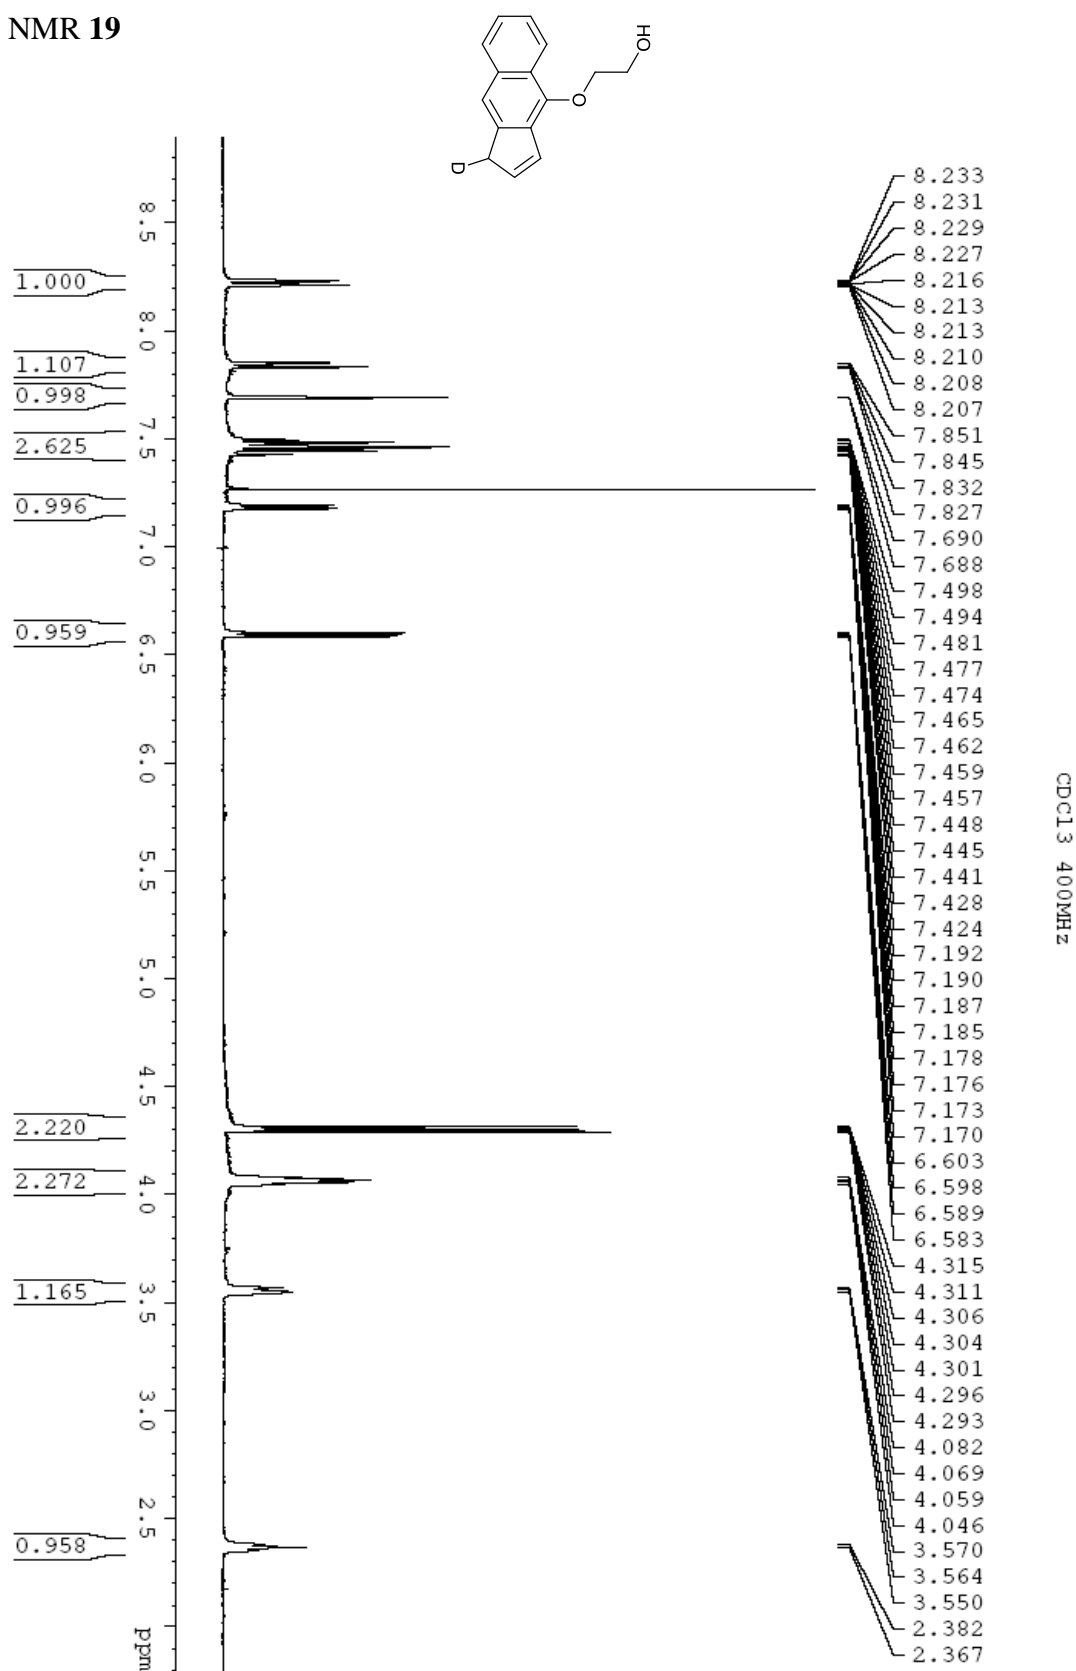

<sup>13</sup>C NMR 19

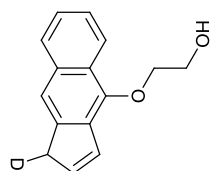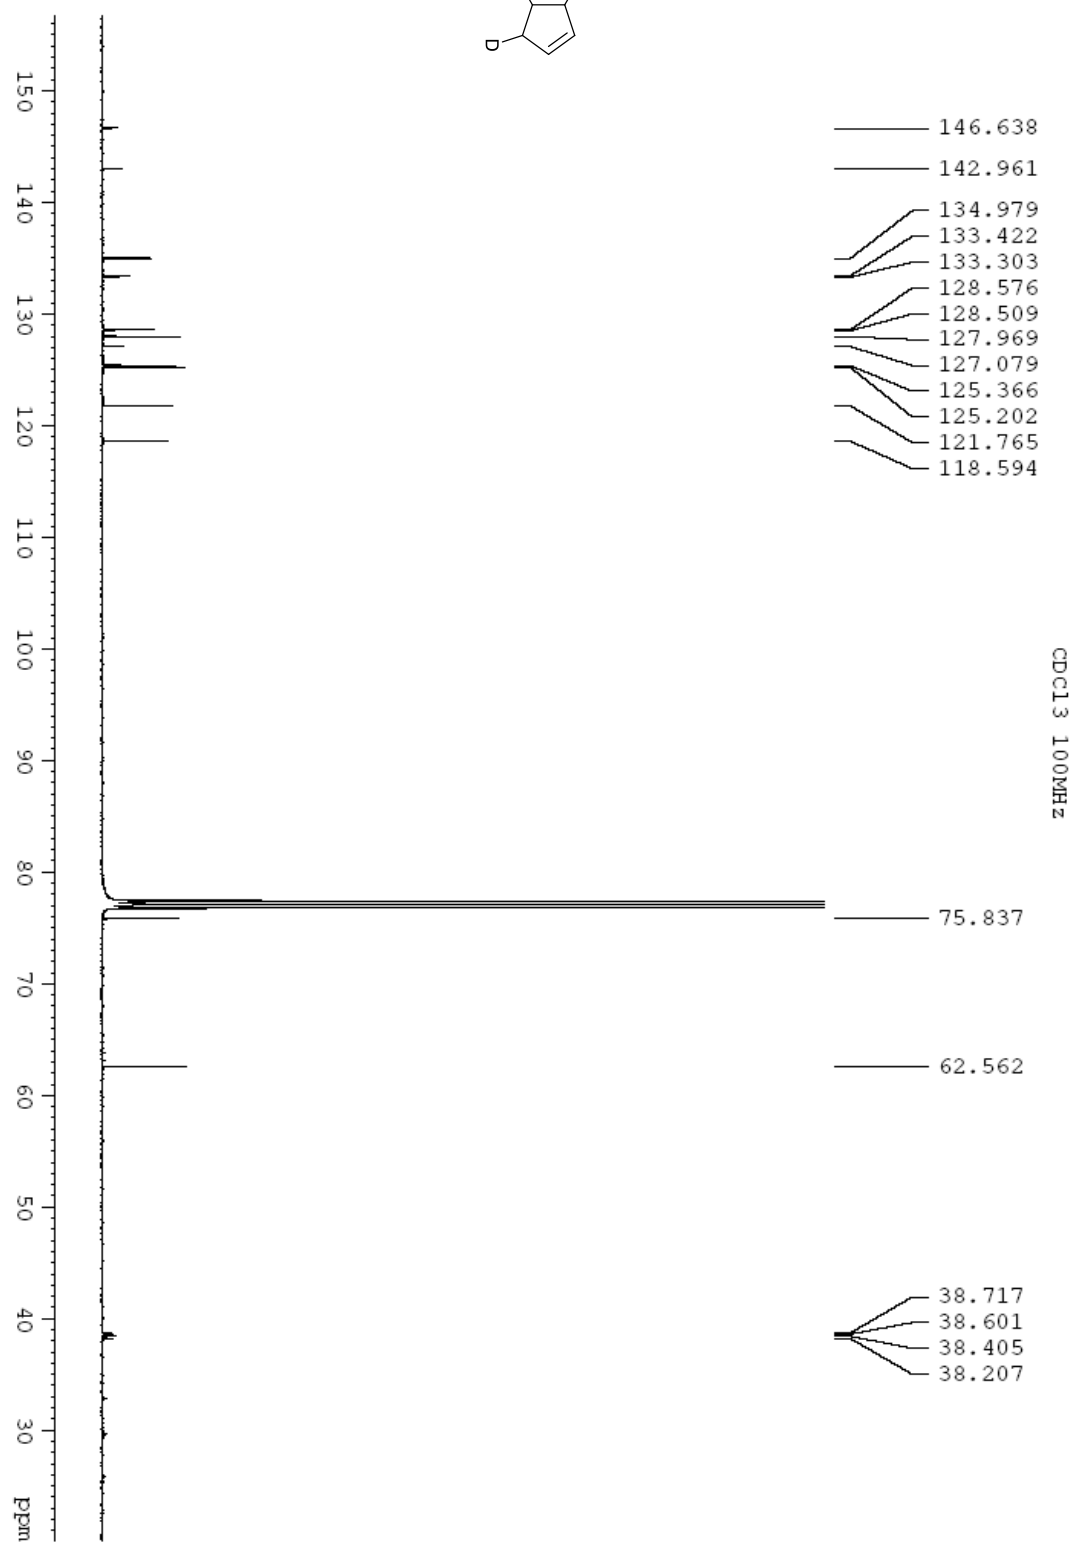

<sup>1</sup>H NMR 21

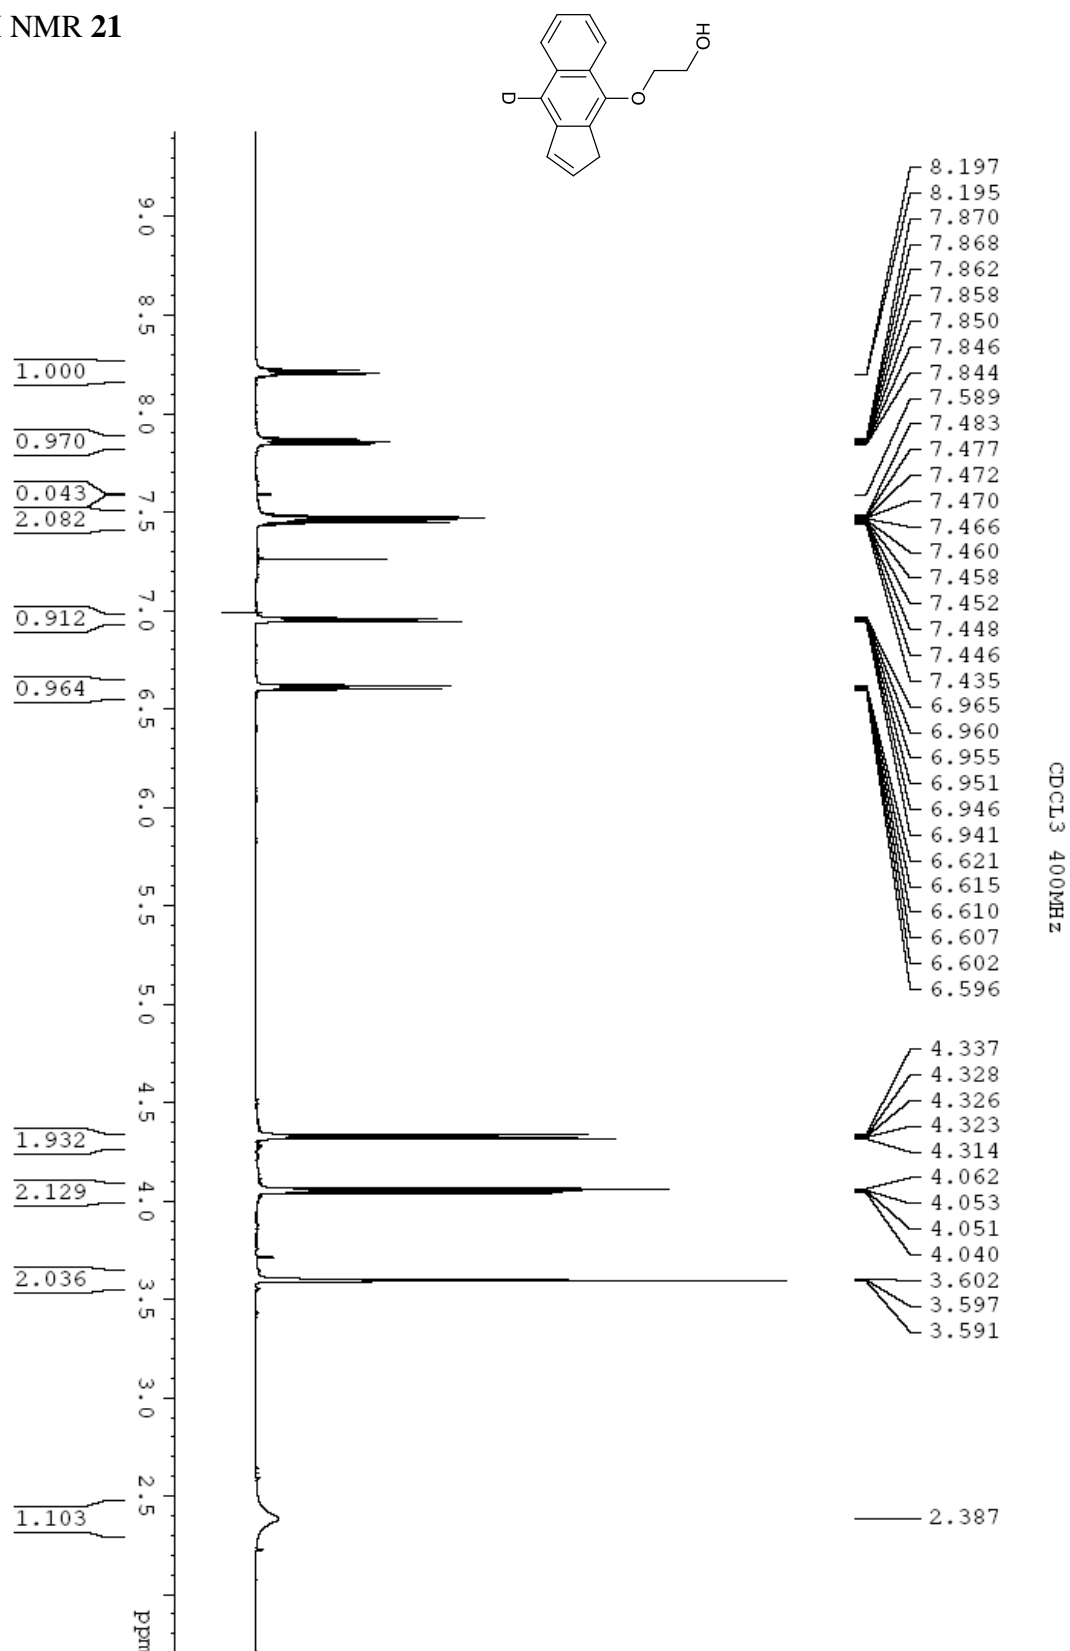

<sup>13</sup>C NMR 21

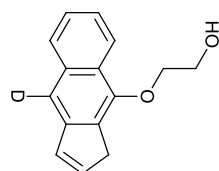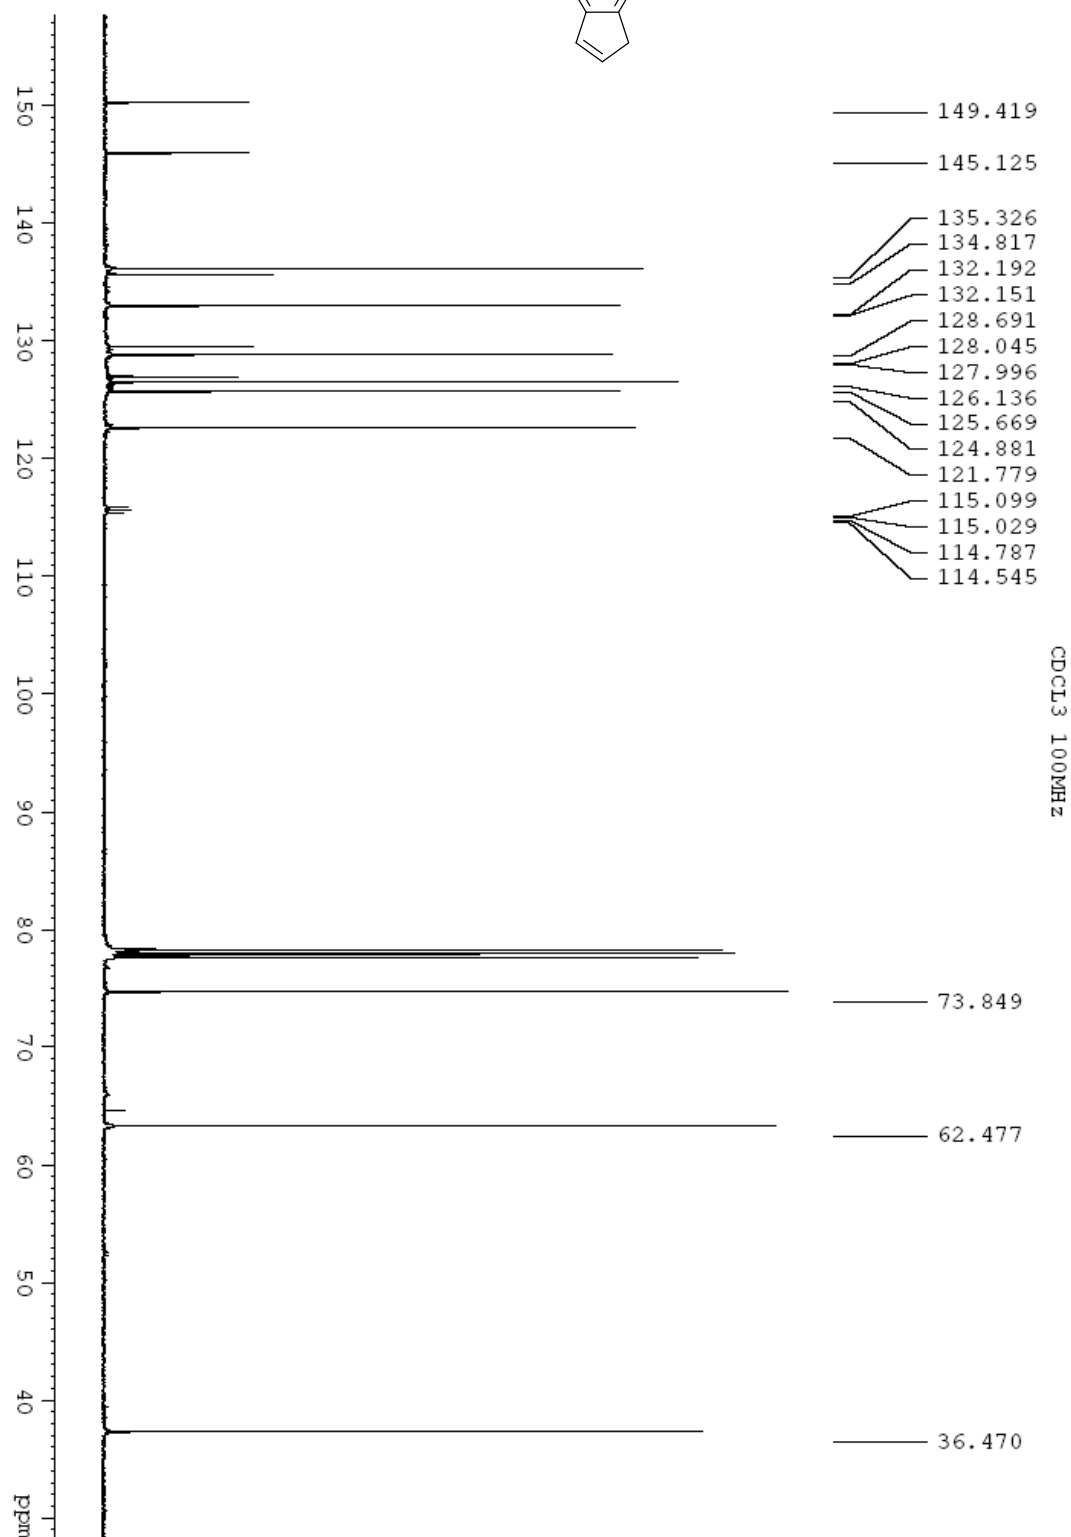



<sup>1</sup>H NMR 22

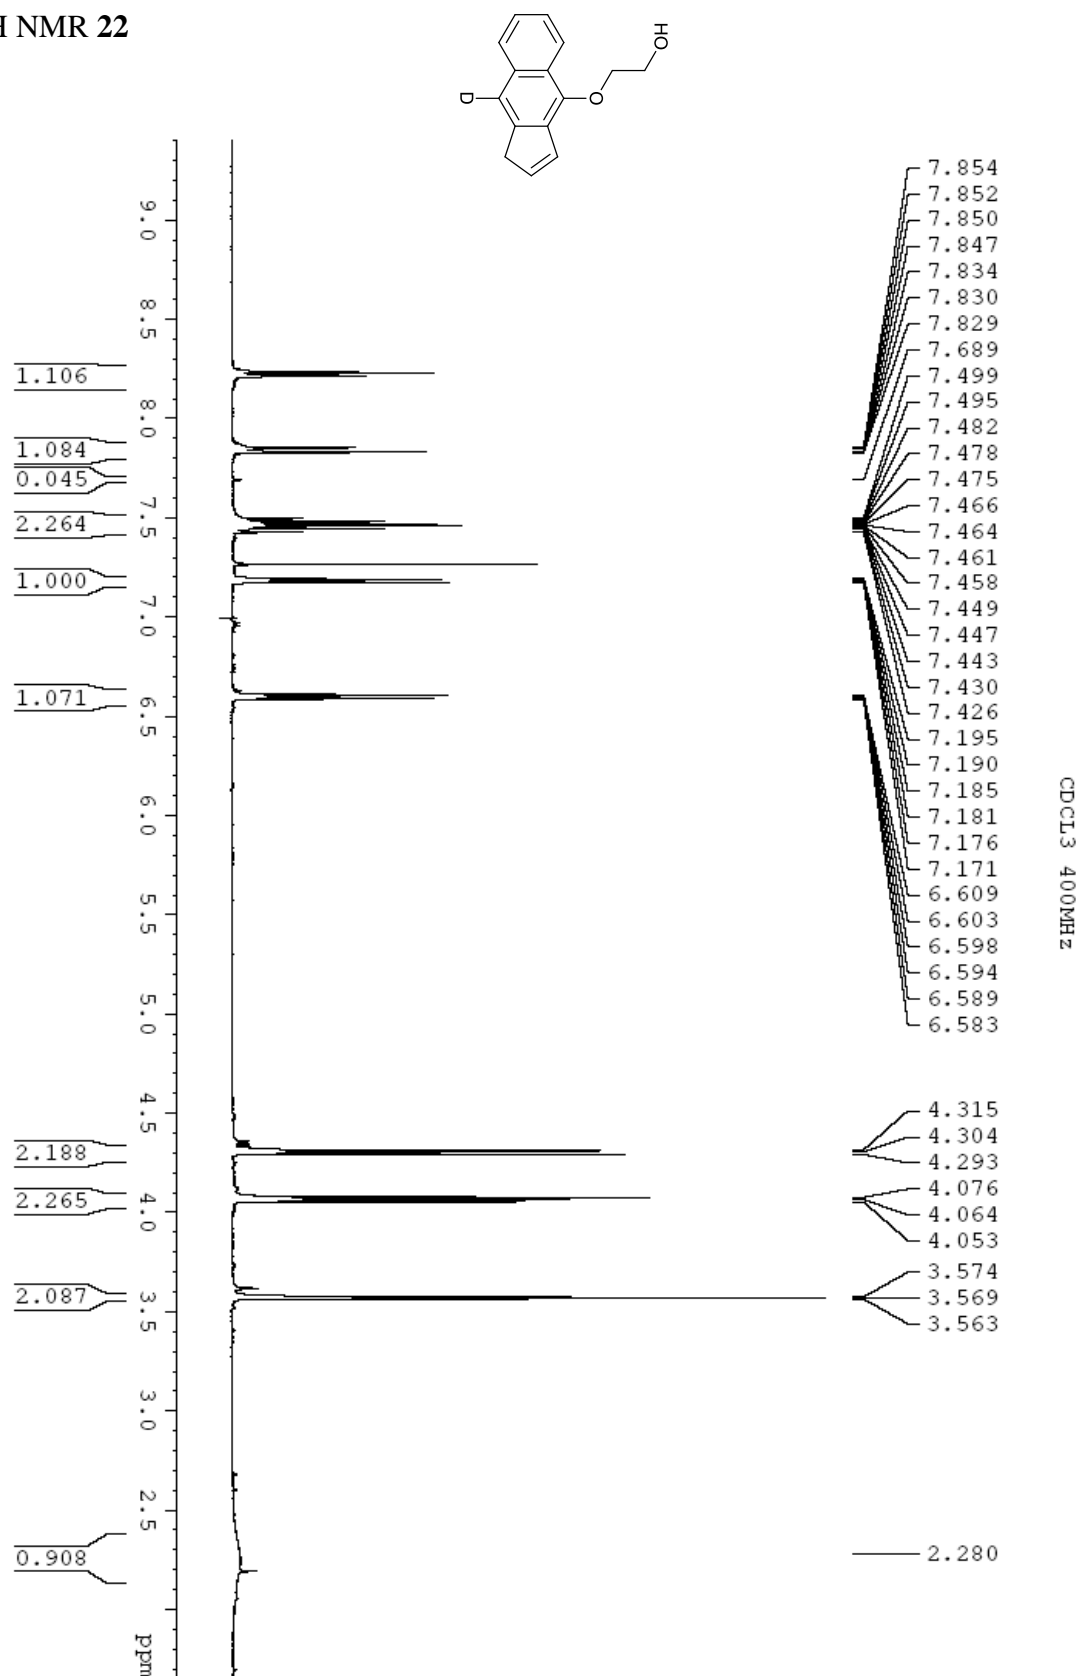

<sup>13</sup>C NMR 22

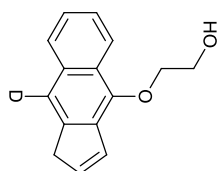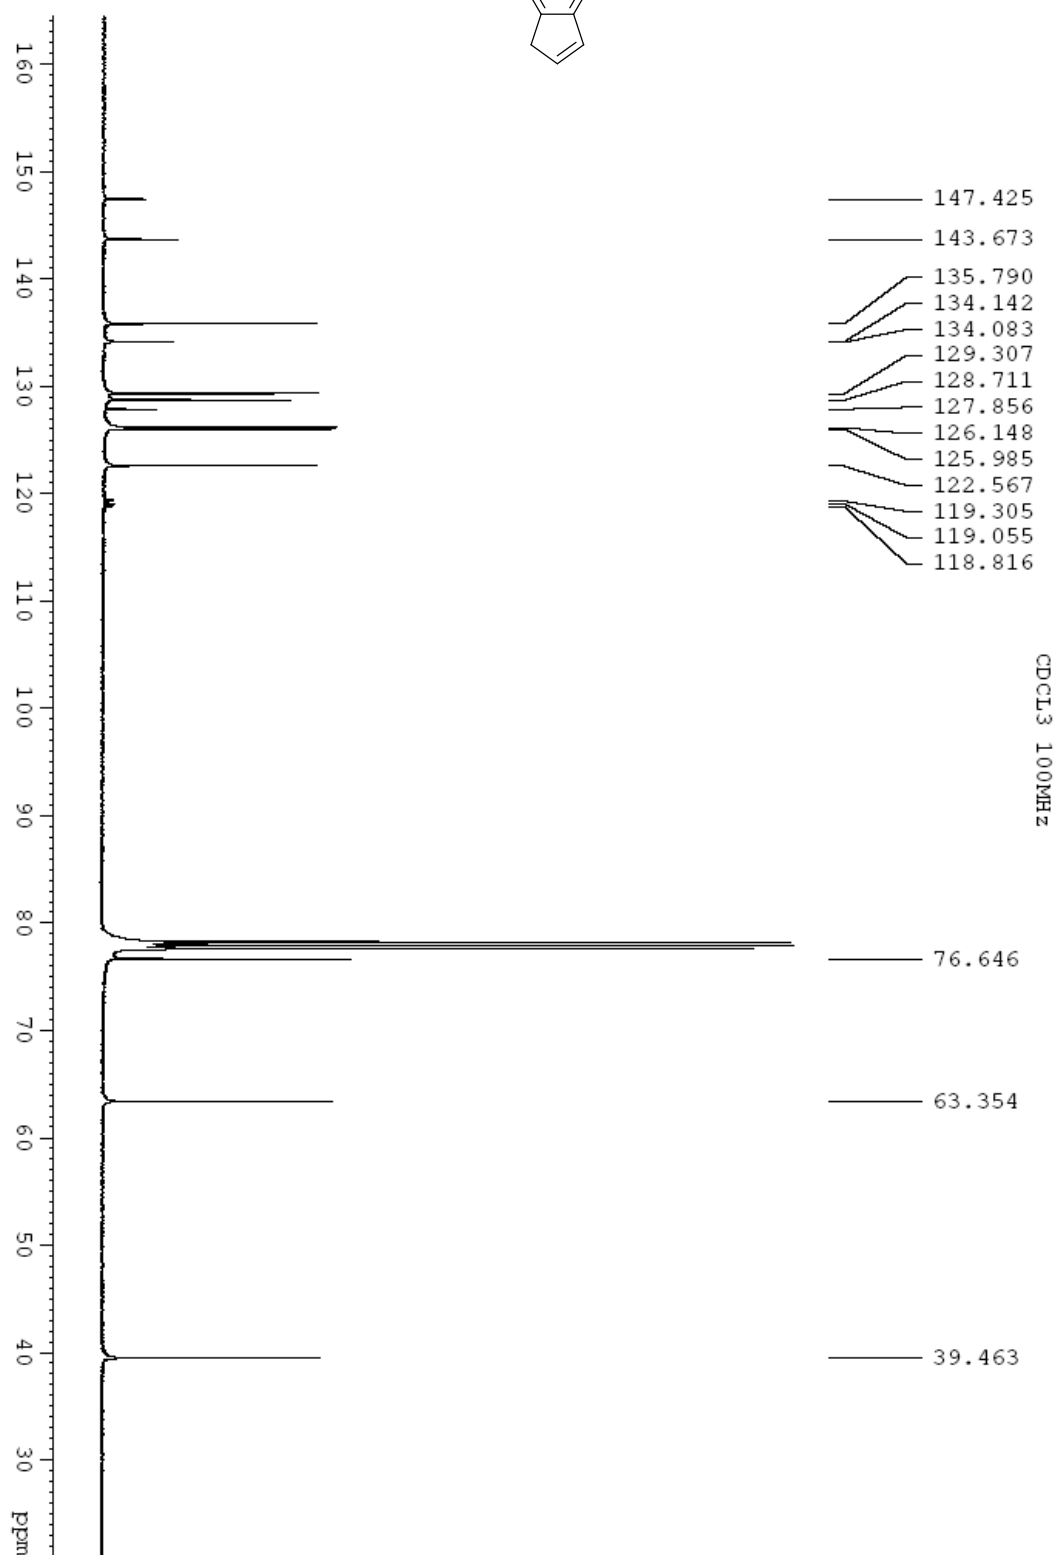

NOE experiment for **5b**

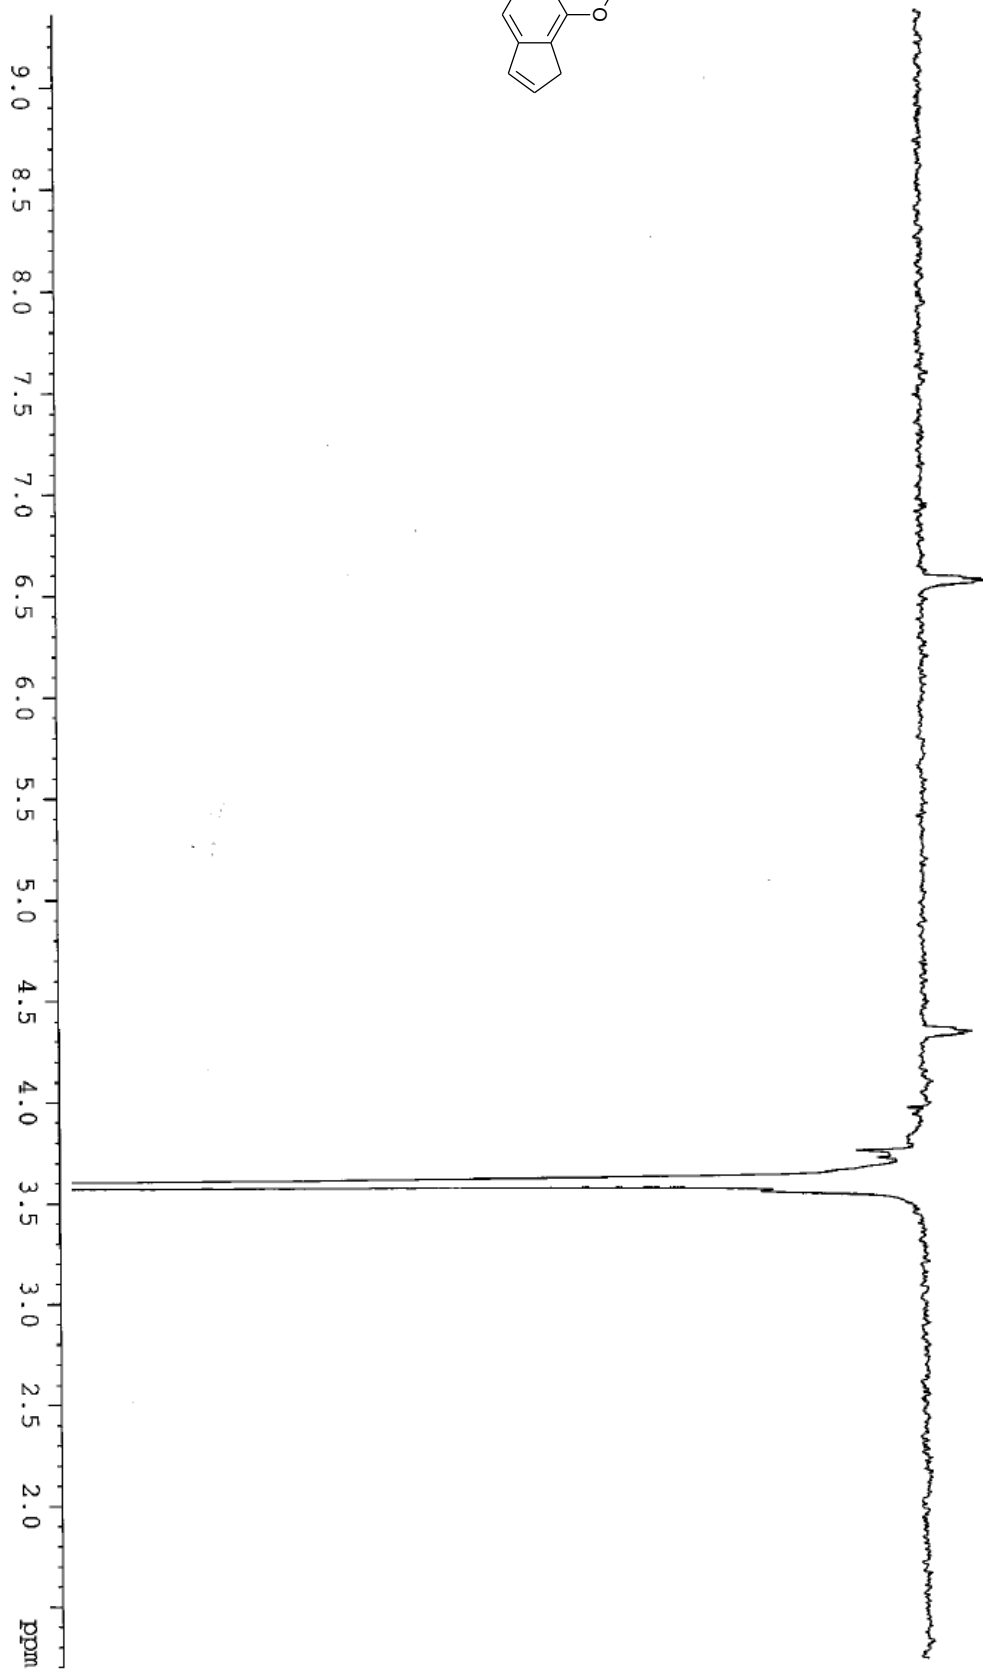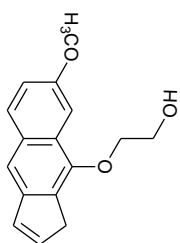

NOE experiment for **6b**

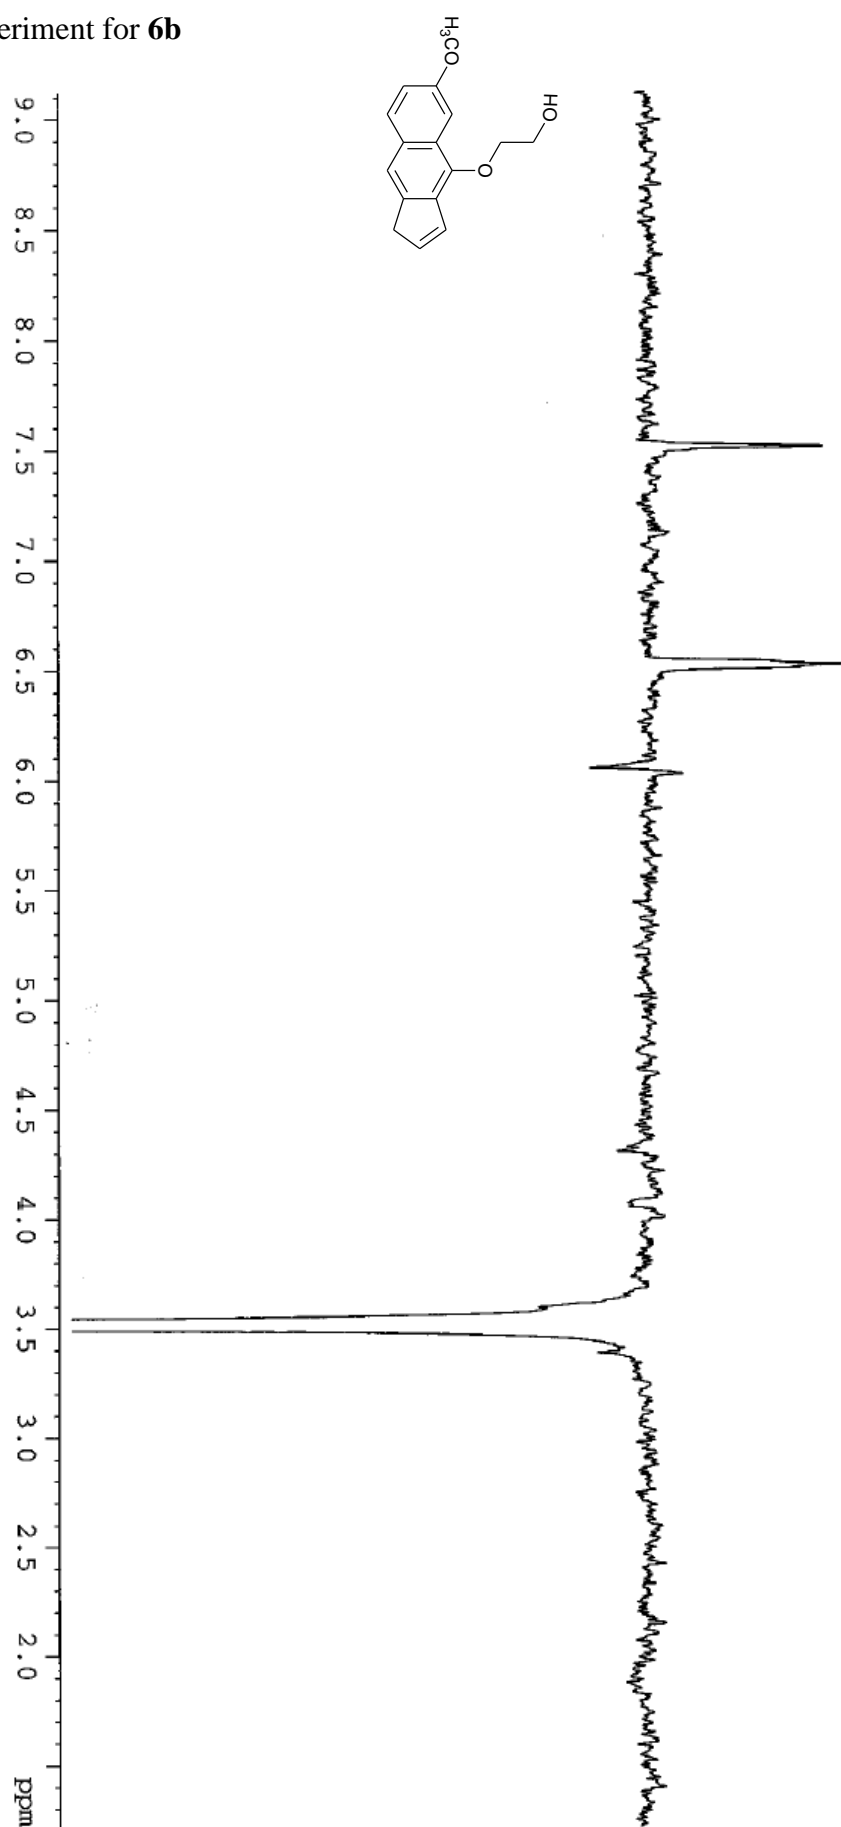

Supplement: Additional file 1 [file 1860-5397-12-28-S1.pdf]
